# Supplementary material
Source: publisher figshare collection journal article supplement (https://tandf.figshare.com/ndownloader/files/22056897)
Supplement: Supplementary file 1 [file 22056897]

## Sheet: Supplementary Table 1S
No.	Name	SpMin1_Bhs	C2SP2	nssO	ETA_BetaP_ns_d	MDEC.24	AVP.5	MATS4v	AATS6p	SpMax3_Bhi	SpMax4_Bhe	GATS2m	GATS2p	ETA_EtaP_F	AATS2i	VC.6	Status	Lable(exp.)	Lable(SVM)	Lable(GRNN)
1	CHEMBL219517	2.03609	10	1	0.03571	0	0.0230945	-0.00457593	1.41303	3.77586	3.49206	0.752719	0.773633	0.98841	152.993	0	Inactive	-1	-1	-1
2	CHEMBL380797	2.15586	1	0	0	19.7613	0.0453199	-0.123684	1.00998	3.74199	3.50052	0.853899	0.979989	0.29894	150.066	0.608102	Inactive	-1	-1	-1
3	CHEMBL591362	2.00107	30	0	0	4.89703	0.01873	0.0478037	1.60445	3.86525	3.82662	0.790574	1.03456	1.43473	149.286	0.0388907	Inactive	-1	-1	-1
4	CHEMBL465546	1.96579	0	10	0	6.95962	0.0320248	-0.108514	0.948248	3.65022	3.58747	0.870408	1.15661	0.42979	154.43	0.0772446	Inactive	-1	-1	-1
5	CHEMBL2377306	1.81187	1	1	0	0	0.0226247	-0.182215	0.802083	3.22715	3.10634	0.773252	0.823627	0.77017	164.701	0	Inactive	-1	-1	-1
6	CHEMBL341638	1.9678	18	2	0.04286	3.87554	0.0206978	-0.114951	1.34979	3.8112	3.56777	0.585529	0.876748	1.19779	162.162	0.00449958	Inactive	-1	-1	-1
7	CHEMBL1094695	2.09922	22	8	0.06818	0	0.0220426	-0.0903093	1.40694	3.85957	3.82171	0.90068	0.761051	1.29712	152.448	0	Inactive	-1	-1	-1
8	CHEMBL3121245	2.0449	24	2	0.075	0	0.0176618	-0.0382624	1.53958	3.88422	3.75704	0.612126	1.05368	1.44463	141.356	0	Inactive	-1	-1	-1
9	CHEMBL1761032	2.12821	5	0	0	9.28255	0.0483696	-0.0538906	1.0449	3.48484	3.38352	0.782897	0.972142	0.31694	149.191	0.129668	Inactive	-1	-1	-1
10	CHEMBL2218894	1.89202	0	0	0	0	0.132884	-0.00767114	1.31417	3.19703	2.98154	0.971335	1.11209	-0.02243	149.792	0	Inactive	-1	-1	-1
11	CHEMBL251233	1.84608	10	2	0.06667	2.51136	0.0225768	-0.166832	1.27332	3.59759	3.41722	0.529787	0.605674	1.12587	168.499	0.00389675	Inactive	-1	-1	-1
12	CHEMBL557845	1.93371	7	1	0	2.12571	0.0241984	-0.201065	1.18847	3.34298	2.81113	0.572546	0.647819	0.73988	143.586	0.0308746	Inactive	-1	-1	-1
13	CHEMBL537246	1.94984	16	0	0.05769	0	0.023088	0.104276	1.70169	3.82697	3.37301	0.610202	0.890251	1.10665	145.829	0	Inactive	-1	-1	-1
14	CHEMBL1215383	1.92475	7	6	0	0	0.022186	-0.122712	1.13887	3.82914	3.54006	0.827314	1.08499	1.18312	158.96	0.00981479	Inactive	-1	-1	-1
15	CHEMBL1503	2.0975	22	4	0.02778	4.97898	0.0236668	-0.0844382	1.50262	3.85033	3.80061	0.895065	0.947057	1.15127	146.672	0.0178397	Inactive	-1	-1	-1
16	CHEMBL585	1.6514	1	0	0.08333	0	0.014694	-0.46986	0.724217	3.26539	2.62895	0.665675	0.842326	0.83007	172.356	0	Inactive	-1	-1	-1
17	CHEMBL557703	1.97611	9	5	0.05357	6.10748	0.0268661	-0.134237	1.12048	3.52351	3.33524	0.827207	0.75509	0.90953	153.753	0.0717209	Inactive	-1	-1	-1
18	CHEMBL234545	2.04125	15	0	0	5.55161	0.0263506	-0.0252687	1.37268	3.78211	3.16264	0.96442	1.078	0.99593	141.48	0.0279508	Inactive	-1	-1	-1
19	CHEMBL1091473	2.12408	11	0	0	5.51099	0.036366	-0.0106815	1.24357	3.81488	3.61277	1.01777	1.0679	0.74086	148.304	0.0395285	Inactive	-1	-1	-1
20	CHEMBL280074	2.06907	0	1	0	11.3267	0.0498224	-0.0817098	0.929133	3.71417	3.43808	1.01935	1.06233	0.30284	153.338	0.172512	Inactive	-1	-1	-1
21	CHEMBL216723	2.08356	5	0	0	0	0.028625	-0.057399	1.26026	3.5326	3.3029	0.849215	0.799446	0.8999	157.092	0.0179877	Inactive	-1	-1	-1
22	CHEMBL464825	2.01374	18	0	0.03571	0	0.0303077	-0.0122634	1.70252	3.82305	3.50895	0.927481	1.04021	1.15018	139.805	0	Inactive	-1	-1	-1
23	CHEMBL1172881	2.09117	3	2	0	4.47328	0.0296519	-0.13941	1.02254	3.59275	3.4448	0.714504	0.975	0.87386	151.749	0.372444	Inactive	-1	-1	-1
24	CHEMBL14910	1.94599	6	0	0.03846	0	0.0219618	-0.127339	1.04512	2.98379	2.84225	0.67511	1.03057	0.81978	148.85	0	Inactive	-1	-1	-1
25	CHEMBL233867	1.77944	0	0	0	0	0.0555518	-0.0643972	1.30294	3.68225	3.56302	0.767641	0.918659	0.8072	159.442	0	Inactive	-1	-1	-1
26	CHEMBL2315383	2.04173	9	6	0.05	0	0.0233614	-0.132334	1.26542	3.71536	3.28938	0.853507	0.718105	1.02148	153.478	0	Inactive	-1	-1	-1
27	CHEMBL137938	2.00126	12	3	0.01923	6.26267	0.0179913	-0.131276	1.34232	3.50358	3.42924	0.602501	1.01888	1.07353	144.123	0.0133798	Inactive	-1	-1	-1
28	CHEMBL1169613	2.11594	4	2	0	13.3925	0.0367342	-0.112031	0.984266	3.78842	3.58012	0.768784	1.01516	0.61304	151.312	0.435686	Inactive	-1	-1	-1
29	CHEMBL144875	2.02005	20	3	0.07317	0	0.0210903	-0.110159	1.40613	3.84046	3.82391	0.766332	1.0438	1.34755	145.957	0	Inactive	-1	-1	-1
30	CHEMBL47940	1.98342	30	0	0	0	0.0187916	0.0142081	1.64484	3.86454	3.82626	0.846158	1.05245	1.41935	149.097	0	Inactive	-1	-1	-1
31	CHEMBL1950991	2.16633	0	0	0	14.5729	0.0454856	-0.130393	0.963749	3.73228	3.4997	0.868919	1.02728	0.3609	149.874	0.645798	Inactive	-1	-1	-1
32	CHEMBL601337	1.80185	1	0	0.02941	0	0.039511	-0.00809043	1.66907	3.30151	3.17696	0.806574	0.995201	0.80288	154.426	0	Inactive	-1	-1	-1
33	CHEMBL1215384	2.00484	4	4	0	0	0.029937	-0.064967	1.1728	3.58229	3.46112	0.836914	0.956242	0.77363	154.766	0	Inactive	-1	-1	-1
34	CHEMBL3218335	2.12423	11	4	0.04839	0.965406	0.019254	0.070587	1.30802	3.68963	3.51051	0.711735	0.744425	1.12915	157.126	0	Inactive	-1	-1	-1
35	CHEMBL141111	2.03848	14	3	0.05769	0	0.0227885	-0.230893	1.21052	3.54234	3.34062	0.861402	0.723063	1.10155	152.356	0	Inactive	-1	-1	-1
36	CHEMBL1214102	1.6921	1	4	0	0	0.0263077	-0.173059	1.07661	3.67544	3.37017	0.942955	1.15202	0.86493	161.158	0	Inactive	-1	-1	-1
37	CHEMBL535611	1.93252	8	0	0	0	0.0241904	-0.0196926	1.63923	3.09686	2.73842	0.568968	0.713012	0.84858	139.918	0	Inactive	-1	-1	-1
38	CHEMBL3758822	1.87026	10	0	0.07143	1.65523	0.0230132	-0.0139258	1.43154	3.41603	3.20552	0.567796	0.89257	1.07696	157.118	0.00449958	Inactive	-1	-1	-1
39	CHEMBL538157	1.86304	5	0	0	0	0.0371695	-0.193822	1.33671	3.37938	2.96761	0.975595	1.20212	0.79467	152.873	0.00658396	Inactive	-1	-1	-1
40	CHEMBL295594	1.89679	4	0	0.025	1.53262	0.0282383	0.204168	0.916627	3.47803	3.24763	0.54016	0.869112	0.74866	162.498	0.00389675	Inactive	-1	-1	-1
41	CHEMBL576676	1.95733	19	6	0.08333	0	0.0238744	-0.242537	1.26869	3.85641	3.49078	0.890025	0.655726	1.18542	154.729	0	Inactive	-1	-1	-1
42	CHEMBL3633234	2.01641	11	0	0.0122	4.36773	0.0334032	-0.100368	1.22967	3.89294	3.69729	0.976843	0.935935	0.85078	153.963	0.0436551	Inactive	-1	-1	-1
43	CHEMBL2431486	1.83453	8	0	0	0	0.0264467	0.076824	1.59681	3.5581	3.13042	0.543879	0.693564	0.75516	160.183	0	Inactive	-1	-1	-1
44	CHEMBL1807203	2.10359	1	0	0	11.1207	0.0435156	-0.140905	0.872559	3.46113	3.31159	0.850725	0.987503	0.3873	148.244	0.145781	Inactive	-1	-1	-1
45	CHEMBL1652425	1.98326	21	0	0.025	2.12644	0.0258127	0.0490455	1.37194	3.90011	3.79026	0.797721	0.979492	1.20753	147.722	0.0833333	Inactive	-1	-1	-1
46	CHEMBL1917517	1.8372	0	0	0	2.71847	0.0640992	0.262744	1.31888	3.62081	3.40563	0.728595	0.756212	0.67264	162.452	0	Inactive	-1	-1	-1
47	CHEMBL488491	2.0382	10	0	0	0	0.0234761	-0.117256	1.27043	3.31874	2.94369	0.938699	1.06132	0.85374	145.172	0	Inactive	-1	-1	-1
48	CHEMBL1213462	2.10534	3	1	0.01563	5.64545	0.0414799	-0.0317339	0.986401	3.79246	3.48852	1.00638	0.943043	0.51748	156.405	0.137716	Inactive	-1	-1	-1
49	CHEMBL1807749	1.99205	16	2	0	0	0.0230778	-0.117426	1.40691	3.91642	3.78156	0.84472	0.950521	1.18994	149.226	0	Inactive	-1	-1	-1
50	CHEMBL1213929	2.09538	22	6	0.05	4.54515	0.023184	-0.143207	1.39963	3.85534	3.82131	0.87364	0.843453	1.21027	149.866	0.0178397	Inactive	-1	-1	-1
51	CHEMBL1078341	2.17083	0	0	0	4.94942	0.0488551	0.00476212	1.186	3.59359	3.52205	0.590316	0.800676	0.43662	150.925	0.054836	Inactive	-1	-1	-1
52	CHEMBL53427	2.08053	7	1	0	7.66434	0.0265427	0.0100868	1.06585	3.54037	3.42902	0.65355	0.876748	0.88381	146.702	0.10303	Inactive	-1	-1	-1
53	CHEMBL2041989	1.93264	9	0	0.01724	4.11862	0.0197804	0.190591	1.55259	3.52043	3.43047	0.373768	0.662409	1.15639	165.929	0.0818923	Inactive	-1	-1	-1
54	CHEMBL3338908	2.0833	14	0	0	3.07033	0.0236881	-0.149983	1.25816	3.84606	3.55848	0.738159	0.939063	1.13829	145.525	0.0476126	Inactive	-1	-1	-1
55	CHEMBL36327	1.97763	20	3	0.0625	5.99322	0.0182851	-0.0119859	1.48078	3.8446	3.81022	0.649908	1.08703	1.36371	143.905	0.0502322	Inactive	-1	-1	-1
56	CHEMBL1290774	1.9127	9	3	0.05556	3.80909	0.0251389	-0.15154	1.22949	3.63571	3.34021	0.855607	0.769273	0.96613	156.393	0.0227062	Inactive	-1	-1	-1
57	CHEMBL1835176	1.87022	2	2	0.025	1.27789	0.0410103	0.0738881	1.41736	3.45522	3.29588	0.65712	0.946344	0.82814	167.954	0.00449958	Inactive	-1	-1	-1
58	CHEMBL249080	2.00526	15	3	0.06061	0	0.0184446	-0.0277275	1.33507	3.79016	3.54555	0.653263	1.04842	1.20747	143.968	0	Inactive	-1	-1	-1
59	CHEMBL1290360	2.05595	8	3	0.08	0	0.0282757	-0.248603	1.18807	3.53547	3.25441	0.880106	0.730158	0.88876	155.374	0	Inactive	-1	1	-1
60	CHEMBL602365	2.00542	6	3	0.06	0	0.0224097	-0.0258629	1.19283	3.57054	3.32863	0.782255	0.974801	0.91264	150.833	0	Inactive	-1	-1	-1
61	CHEMBL448594	2.08721	9	0	0.025	1.76976	0.0247975	0.265351	1.35485	3.53876	3.15904	0.607494	0.832136	0.90271	149.587	0.013736	Inactive	-1	-1	-1
62	CHEMBL342010	1.8859	5	2	0.025	0	0.0268515	-0.0109979	1.39253	3.45944	3.30232	0.751765	0.957211	0.87977	160.128	0	Inactive	-1	-1	-1
63	CHEMBL1673061	1.93409	10	0	0	0	0.0347474	-0.0302231	0.99233	3.81566	3.65588	1.05678	0.730717	0.83308	163.631	0	Inactive	-1	-1	-1
64	CHEMBL498036	2.10176	2	1	0	8.74951	0.0400562	-0.219191	0.92694	3.54749	3.40825	0.788729	1.07299	0.52463	150.877	0.319732	Inactive	-1	-1	-1
65	CHEMBL437925	1.87307	5	0	0	3.80909	0.0272103	-0.156241	1.39193	3.60911	3.19437	0.930998	0.943205	0.8108	149.785	0.0227062	Inactive	-1	-1	-1
66	CHEMBL240418	1.93216	13	5	0.04688	2.56652	0.018735	-0.00452292	1.40747	3.65858	3.56233	0.770854	0.888163	1.13797	154.679	0.00491046	Inactive	-1	-1	-1
67	CHEMBL1290201	1.98654	11	7	0.10345	0	0.0192467	-0.168763	1.24524	3.49916	3.2155	0.777613	0.497811	1.16321	158.514	0	Inactive	-1	-1	-1
68	CHEMBL527655	1.93322	19	1	0.02083	0	0.022536	0.00608661	1.51581	3.79409	3.40443	0.859427	1.10935	1.02293	143.161	0	Inactive	-1	-1	-1
69	CHEMBL2377298	1.93286	3	3	0	3.13459	0.0203347	0.0438447	0.837608	3.47235	3.21781	0.583973	0.842124	0.73257	155.492	0.196092	Inactive	-1	-1	-1
70	CHEMBL2207699	1.91022	3	2	0	1.31037	0.0291936	-0.096418	1.14686	3.69634	3.40683	0.738221	1.02623	0.8923	150.572	0.0670615	Inactive	-1	-1	-1
71	CHEMBL1213553	2.12204	7	2	0	11.0186	0.0285246	-0.120978	1.00852	3.79062	3.52811	0.690013	0.920771	0.79716	148.987	0.437321	Inactive	-1	-1	-1
72	CHEMBL173684	1.96275	7	0	0.06522	1.09336	0.0533653	0.178282	2.48904	3.48225	3.28649	0.317086	0.526753	0.88498	146.381	0.0205507	Inactive	-1	-1	-1
73	CHEMBL1835172	1.78256	5	2	0.02381	1.85454	0.0299869	0.0373461	1.35907	3.49917	3.30756	0.703707	0.83931	0.82792	165.804	0.0147109	Inactive	-1	-1	-1
74	CHEMBL1099121	1.98739	20	0	0	3.39292	0.0187841	0.070081	1.46769	3.84217	3.63596	0.688767	0.9928	1.23288	154.012	0.0388907	Inactive	-1	-1	-1
75	CHEMBL3133768	1.79901	13	3	0.03226	3.23737	0.0226662	-0.0790548	1.20493	3.77189	3.53622	0.896399	1.26456	1.04658	150.43	0	Inactive	-1	-1	-1
76	CHEMBL551727	1.78239	5	4	0.02941	2.87443	0.0240051	0.15674	1.43092	3.29274	2.84446	0.647148	1.06303	0.58141	151.428	0	Inactive	-1	-1	-1
77	CHEMBL521892	1.79489	2	3	0	0	0.0369717	-0.0471485	1.00494	3.49892	3.24788	1.00636	1.34932	0.42194	157.023	0	Inactive	-1	-1	-1
78	CHEMBL197951	1.97732	13	0	0.0303	0	0.0233942	0.00295479	1.33158	3.8371	3.64922	0.868502	1.02964	1.15509	153.804	0.00849986	Inactive	-1	-1	-1
79	CHEMBL337993	2.13881	8	1	0.01515	5.44394	0.0390505	-0.0328869	1.01786	3.79766	3.56283	0.980872	1.0054	0.63082	151.892	0.137716	Inactive	-1	-1	-1
80	CHEMBL140765	2.09857	15	0	0.02381	0	0.0253827	-0.156364	1.35818	3.5307	3.34018	0.87431	1.04321	1.01251	140.882	0	Inactive	-1	-1	-1
81	CHEMBL2337377	2.01783	13	3	0.03846	0	0.0170808	-0.00981111	1.73155	3.81266	3.39522	0.621898	1.00268	1.11169	148.417	0	Inactive	-1	-1	-1
82	CHEMBL1761023	2.06268	21	0	0.01351	0	0.0236379	-0.0446109	1.41137	3.86483	3.80286	0.776376	0.9993	1.17444	150.126	0	Inactive	-1	-1	-1
83	CHEMBL337311	1.98911	13	1	0.04	0	0.0459275	-0.0534162	1.74575	3.78426	3.31502	0.856154	0.866674	0.97907	145.46	0	Inactive	-1	-1	-1
84	CHEMBL1796539	2.06145	3	0	0	0	0.041137	-0.0308868	1.0095	3.61811	3.38862	1.01299	1.22166	0.4133	148.446	0	Inactive	-1	-1	-1
85	CHEMBL218331	1.978	11	3	0.05882	2.4171	0.0221127	0.028336	1.24553	3.66746	3.58192	0.730055	0.855746	1.07245	152.726	0.0194796	Inactive	-1	-1	-1
86	CHEMBL2071294	2.06686	7	2	0.03571	2.5571	0.022196	-0.178478	1.2588	3.56717	3.40106	0.64085	0.806911	1.04737	148.48	0.0208333	Inactive	-1	-1	-1
87	CHEMBL502427	2.11554	2	0	0	11.9849	0.0445003	-0.125852	0.960297	3.7311	3.54878	0.936578	1.04718	0.34575	151.159	0.558634	Inactive	-1	-1	-1
88	CHEMBL408	2.1104	16	1	0.03125	2.67563	0.0212756	0.0882894	1.23766	3.66706	3.53448	0.622077	0.960205	1.08728	147.957	0	Inactive	-1	-1	-1
89	CHEMBL1213814	1.92074	5	0	0	0	0.0193272	-0.0616352	1.27453	3.27431	2.91544	0.698111	0.959594	1.01307	143.834	0	Inactive	-1	-1	-1
90	CHEMBL594742	2.00086	6	4	0	3.1994	0.0251926	-0.129163	1.04073	3.51357	3.27863	0.928733	0.731562	0.75946	155.718	0.0443179	Inactive	-1	-1	-1
91	CHEMBL3318021	2.06818	18	0	0.05556	3.04755	0.0182978	-0.101504	1.46247	3.74657	3.73076	0.589264	0.926481	1.4724	139.427	0.0242061	Inactive	-1	-1	-1
92	CHEMBL1224171	2.06744	25	4	0.02222	0	0.0218658	-0.0988209	1.44821	3.88364	3.8459	0.895979	0.933432	1.24138	150.135	0	Inactive	-1	-1	-1
93	CHEMBL580443	2.03224	25	0	0	0	0.0213208	-0.0447446	1.60068	3.87513	3.81853	0.815955	1.02865	1.25053	143.497	0	Inactive	-1	-1	-1
94	CHEMBL2334425	1.83703	1	0	0	2.49064	0.0755192	-0.09814	1.01762	3.57389	3.34457	0.91687	1.12247	0.25777	152.838	0.0441942	Inactive	-1	-1	-1
95	CHEMBL75773	1.91692	4	0	0	3.51676	0.0271296	-0.0385864	1.19892	3.35523	3.31725	0.848378	1.23155	1.08096	159.58	0.144786	Inactive	-1	-1	-1
96	CHEMBL2261399	1.53971	1	0	0	0	0.0145905	-0.284486	0.685823	3.19903	2.44892	0.616388	0.994841	0.80931	169.046	0	Inactive	-1	-1	-1
97	CHEMBL1095333	2.07643	3	0	0	6.72458	0.0488423	-0.202216	0.917688	3.52687	3.30969	0.898624	1.05809	0.35806	149.096	0.173113	Inactive	-1	-1	-1
98	CHEMBL378101	1.9448	8	0	0.02174	0	0.0396839	0.0682393	1.35923	3.77364	3.36349	0.853869	0.971094	0.7762	155.329	0	Inactive	-1	-1	-1
99	CHEMBL218630	1.98466	19	2	0.0303	0	0.0241902	-0.166722	1.48733	3.88845	3.63325	0.784325	0.906337	1.20114	148.731	0.00849986	Inactive	-1	-1	-1
100	CHEMBL252331	1.92825	16	1	0.03125	2.02945	0.0207812	-0.0365243	1.4687	3.82026	3.61979	0.602883	0.900247	1.20207	158.26	0.00449958	Inactive	-1	-1	-1
101	CHEMBL244948	1.93086	11	1	0	3.97628	0.0459932	-0.0648361	1.28621	3.8399	3.63859	1.15807	1.25895	0.91226	151.129	0.0127578	Inactive	-1	-1	-1
102	CHEMBL271646	1.80397	4	0	0	0	0.0289735	-0.158575	1.06291	3.19905	3.09774	0.845762	0.784424	0.66982	165.233	0	Inactive	-1	-1	-1
103	CHEMBL1807209	1.76376	0	1	0	1.19428	0.0455348	0.183876	1.18266	3.65478	3.47413	0.935102	1.20879	0.42577	156.963	0	Inactive	-1	-1	-1
104	CHEMBL3752445	1.93316	9	2	0.04545	0	0.0186669	-0.181851	1.21446	3.47158	3.3134	0.696899	0.844117	0.93755	158.361	0	Inactive	-1	-1	-1
105	CHEMBL1098810	1.97908	13	2	0.03571	2.98268	0.0199018	0.0881516	1.31447	3.70717	3.51814	0.649055	1.0022	0.98348	147.744	0	Inactive	-1	-1	-1
106	CHEMBL1000	1.42395	0	0	0	0	0.022722	-0.142108	0.557767	2.85692	2.51387	0.979844	1.76228	0.62853	161.724	0	Inactive	-1	-1	-1
107	CHEMBL560880	1.96708	16	3	0.01282	0	0.0323787	-0.0756472	1.27724	3.88072	3.74407	0.970755	0.918556	1.03711	156.14	0.00849986	Inactive	-1	-1	-1
108	CHEMBL367881	2.10892	2	5	0	7.20707	0.0403078	-0.163184	1.00763	3.79693	3.50333	0.883189	1.10493	0.64276	152.971	0.179558	Inactive	-1	-1	-1
109	CHEMBL3120847	1.94256	12	0	0.07143	0	0.0643568	-0.0467349	1.87996	2.93836	2.77182	0.807729	0.82596	0.68911	139.051	0	Inactive	-1	-1	-1
110	CHEMBL1950989	1.53049	0	5	0	0	0.0248547	0.233197	1.02863	3.63331	2.96135	1.03903	1.18842	0.5034	158.765	0	Inactive	-1	-1	-1
111	CHEMBL474910	2.01074	10	0	0.01613	1.84435	0.0185917	-0.244945	1.46263	3.86099	3.52609	0.630014	0.784916	1.27183	161.031	0.00449958	Inactive	-1	-1	-1
112	CHEMBL2087250	1.87247	3	4	0	2.89777	0.0383354	-0.113259	1.00532	3.54126	3.35676	0.884727	1.15226	0.58942	158.092	0	Inactive	-1	-1	-1
113	CHEMBL2042001	1.93609	16	0	0.03125	3.92031	0.0192272	0.0480887	1.45753	3.90117	3.4723	0.593434	0.981739	1.25197	162.111	0.00899915	Inactive	-1	-1	-1
114	CHEMBL211516	2.05591	5	0	0	5.27406	0.0365401	0.0702262	1.00506	3.67732	3.50694	0.777669	0.964668	0.58046	152.117	0.148411	Inactive	-1	-1	-1
115	CHEMBL345131	1.73357	2	2	0	0.820567	0.0280053	0.174874	1.13639	3.61467	3.42457	0.737584	1.23731	0.8331	159.702	0	Inactive	-1	-1	-1
116	CHEMBL1258043	1.92728	12	0	0.05263	0	0.0388461	-0.0158178	1.48062	3.72242	3.02451	0.916856	0.913415	0.80035	151.276	0	Inactive	-1	-1	-1
117	CHEMBL197346	1.93081	12	1	0.02	1.87998	0.0196135	0.0341289	1.31529	3.57103	3.3741	0.56733	0.966377	1.11048	155.439	0.00449958	Inactive	-1	-1	-1
118	CHEMBL1760520	1.99804	9	0	0.05263	0	0.0191985	0.0297309	1.22641	3.28462	3.20086	0.561462	0.871126	1.071	142.428	0	Inactive	-1	-1	-1
119	CHEMBL1077470	2.05384	9	1	0.025	0	0.021962	-0.152808	1.31323	3.47965	3.2397	0.785654	0.747721	0.94584	147.733	0	Inactive	-1	-1	-1
120	CHEMBL1214042	1.8955	7	0	0.0625	1.63299	0.0335735	0.0135072	1.89721	3.55987	3.28062	0.609331	0.704568	1.22175	158.273	0.0108745	Inactive	-1	-1	-1
121	CHEMBL1092456	1.9721	16	2	0.0125	2.05178	0.0271832	0.0749403	1.51567	3.8844	3.67833	0.72868	0.874082	1.13357	151.021	0.0833333	Inactive	-1	-1	-1
122	CHEMBL1214164	2.11463	8	2	0.01563	7.42966	0.0420841	-0.193474	1.11931	3.80053	3.60062	0.748895	0.89916	0.71573	150.363	0.195602	Inactive	-1	-1	-1
123	CHEMBL314302	1.96585	18	4	0.09375	0	0.0242218	-0.231369	1.32561	3.83439	3.39524	0.870507	0.761827	1.13759	151.808	0	Inactive	-1	-1	-1
124	CHEMBL2431491	1.87548	13	5	0.05263	0	0.0223784	-0.13551	1.26946	3.82546	3.56285	0.840786	0.881619	1.14171	158.256	0	Inactive	-1	-1	-1
125	CHEMBL1169388	2.00254	1	3	0	8.38131	0.0504686	-0.192254	0.981281	3.69731	3.53744	0.904033	1.1519	0.37098	154.835	0.356076	Inactive	-1	-1	-1
126	CHEMBL1796425	1.93627	10	3	0.01563	4.5525	0.0312865	-0.0909793	1.30139	3.87992	3.69646	0.727116	0.830878	1.00915	154.02	0.00694011	Inactive	-1	-1	-1
127	CHEMBL1689608	1.96452	11	0	0	2.13506	0.0369324	-0.0855365	1.34882	3.75347	3.25986	0.766322	0.932262	0.89848	144.049	0.0484123	Inactive	-1	-1	-1
128	CHEMBL490099	1.48817	0	1	0	0.5	0.0433028	-0.0395307	0.839386	3.07893	2.82871	0.915807	1.54385	0.53036	166.953	0	Inactive	-1	-1	-1
129	CHEMBL2022211	2.11802	9	0	0	2.17979	0.0308796	0.152923	1.19988	3.63396	3.40179	0.948743	0.800006	0.81115	153.295	0	Inactive	-1	-1	-1
130	CHEMBL223654	2.10452	16	0	0.08333	0	0.0380577	-0.106674	1.72427	3.46136	3.416	0.727212	0.792592	0.99142	138.199	0	Inactive	-1	-1	-1
131	CHEMBL2316642	1.876	0	2	0	1.02967	0.0535767	0.0997691	1.00338	3.33831	2.98154	0.999798	1.0998	0.23906	162.265	0	Inactive	-1	-1	-1
132	CHEMBL2087248	2.17308	1	2	0	19.7613	0.0445014	-0.098611	1.02448	3.74935	3.52627	0.837472	0.93422	0.39195	151.731	0.602362	Inactive	-1	-1	-1
133	CHEMBL135686	2.15609	8	4	0	0	0.0382984	0.0493555	1.35086	3.88037	3.48025	0.954034	1.08459	0.70163	149.376	0	Inactive	-1	-1	-1
134	CHEMBL1398031	1.95008	8	0	0.01852	0	0.0272788	-0.124579	1.5539	3.86487	3.60012	0.961431	1.03248	1.02553	151.755	0	Inactive	-1	1	-1
135	CHEMBL2381685	2.04825	7	4	0.11364	0	0.0182146	-0.22471	1.098	3.33715	3.19724	0.721484	0.52903	1.10148	157.483	0	Inactive	-1	-1	-1
136	CHEMBL2402090	1.90524	8	4	0	0	0.0287452	-0.0297237	1.25481	3.59476	3.49527	0.967335	1.13117	0.6921	152.039	0	Inactive	-1	-1	-1
137	CHEMBL117	2.03673	14	0	0.04545	0	0.0226719	-0.171847	1.32491	3.53128	3.32074	0.794153	1.05429	1.07277	143.396	0	Inactive	-1	-1	-1
138	CHEMBL1094284	1.90852	0	4	0	0.816497	0.0318729	-0.00522294	1.0938	3.63344	3.4916	0.733421	1.07673	0.80195	154.031	0.0825333	Inactive	-1	-1	-1
139	CHEMBL1835173	1.9548	7	2	0.02273	0	0.0501627	0.141411	1.57532	3.57229	3.37235	0.792819	1.00265	0.75438	153.361	0	Inactive	-1	-1	-1
140	CHEMBL1214743	1.96931	9	4	0.0303	5.61786	0.0235594	0.0376024	1.16589	3.70185	3.55114	0.667344	0.941579	0.94557	151.501	0.0194796	Inactive	-1	-1	-1
141	CHEMBL2087246	2.16265	13	2	0	3.54454	0.0339998	0.0938256	1.26831	3.81559	3.67583	0.900475	1.04646	1.08182	152.716	0	Inactive	-1	-1	-1
142	CHEMBL1213930	2.07007	23	4	0.05952	0	0.0223008	-0.190233	1.3222	3.8974	3.79179	0.758758	0.787297	1.25079	152.457	0	Inactive	-1	-1	-1
143	CHEMBL254635	1.97245	11	2	0.01852	1.01348	0.0273582	0.0104863	1.67682	3.7702	3.39906	0.68078	0.908861	1.04832	148.909	0	Inactive	-1	-1	-1
144	CHEMBL2373963	1.82388	8	6	0.02439	2.58556	0.0218241	-0.0553838	1.20207	3.79323	3.67078	0.872329	1.01842	1.13679	152.826	0.0130946	Inactive	-1	-1	-1
145	CHEMBL1081864	1.98801	6	2	0	4.33272	0.0288325	-0.17683	1.03233	3.47036	3.16042	0.906432	0.855465	0.64626	151.928	0.0356442	Inactive	-1	-1	-1
146	CHEMBL91050	2.02756	22	2	0.05263	0	0.0218643	-0.017876	1.57999	3.83577	3.82043	0.778053	1.10849	1.33618	143.031	0	Inactive	-1	-1	-1
147	CHEMBL2431506	2.05548	10	1	0.02857	6.29861	0.0392667	-0.120966	1.29658	3.82065	3.65957	0.736383	0.918861	0.80995	152.999	0.0395285	Inactive	-1	-1	-1
148	CHEMBL1923915	2.05938	9	0	0	2.36063	0.0215828	-0.159058	1.40194	3.76725	3.45509	0.773667	0.900954	1.20423	145.426	0.0566281	Inactive	-1	-1	-1
149	CHEMBL138676	1.8101	2	2	0.025	0	0.0238583	-0.0104847	1.39789	3.45917	3.29237	0.736485	0.938316	0.89584	162.807	0	Inactive	-1	-1	-1
150	CHEMBL580847	2.01429	16	1	0	6.78619	0.0264071	0.0904952	1.38372	3.78211	3.75364	0.974272	1.05843	1.1368	149.853	0.0255155	Inactive	-1	-1	-1
151	CHEMBL1173758	1.87618	5	2	0.02273	1.76923	0.0570381	-0.0105672	1.39984	3.56491	3.30758	0.715767	1.00212	0.76144	163.313	0.00449958	Inactive	-1	-1	-1
152	CHEMBL1830323	2.05778	9	0	0	2.58078	0.0211426	-0.209782	1.32532	3.51161	3.44139	0.583202	0.815821	1.09093	142.789	0.0476126	Inactive	-1	-1	-1
153	CHEMBL140412	1.86896	7	1	0.07692	0	0.017968	-0.206954	0.824168	2.98926	2.75587	0.609902	1.11981	0.88335	144.605	0	Inactive	-1	-1	-1
154	CHEMBL1807752	2.01721	17	0	0.01613	0	0.030712	-0.0240067	1.73421	3.85899	3.54076	0.852592	0.985976	1.22591	142.246	0	Inactive	-1	-1	-1
155	CHEMBL2435698	1.97539	6	0	0.04	1.4404	0.0221819	0.11567	1.14268	3.5681	3.33833	0.676471	1.06142	0.95533	150.64	0	Inactive	-1	-1	-1
156	CHEMBL1502	1.93273	19	3	0.03448	1.73348	0.0198708	-0.066095	1.41704	3.79822	3.42216	0.632177	0.966088	1.14501	152.694	0	Inactive	-1	-1	-1
157	CHEMBL32542	1.94989	4	1	0.01852	2.54685	0.0296101	0.0948433	1.16412	3.65774	3.40473	0.752132	0.983696	0.73622	152.372	0.155502	Inactive	-1	-1	-1
158	CHEMBL473285	1.9217	16	0	0.02857	0	0.0272234	0.0159585	1.48169	3.81688	3.75308	0.779234	0.886333	1.18541	154.343	0	Inactive	-1	-1	-1
159	CHEMBL2089266	2.07725	20	5	0.0119	0	0.035674	-0.0553853	1.37495	3.86837	3.83994	1.10293	1.02538	1.03809	149.151	0	Inactive	-1	-1	-1
160	CHEMBL253677	1.88807	5	2	0.02778	0	0.0516768	0.135771	1.40263	3.36328	3.17678	0.688225	0.958266	0.87586	155.792	0	Inactive	-1	-1	-1
161	CHEMBL1651866	1.94745	23	2	0.07353	0	0.0221318	-0.127105	1.42287	3.88936	3.70456	0.80493	0.955063	1.2226	150.21	0	Inactive	-1	-1	-1
162	CHEMBL608526	1.85238	18	4	0.08333	0	0.0168449	0.057143	1.4827	3.83641	3.78029	0.724227	1.1638	1.40861	147.921	0	Inactive	-1	-1	-1
163	CHEMBL3133774	1.85613	11	2	0	0	0.0316716	-0.00187793	1.24706	3.8503	3.74084	1.02412	1.08169	0.98086	156.148	0	Inactive	-1	-1	-1
164	CHEMBL1917515	1.82972	0	0	0	3.29122	0.0695999	0.156316	1.3002	3.68395	3.57696	0.767392	0.855597	0.57737	160.121	0	Inactive	-1	-1	-1
165	CHEMBL3338905	2.09719	20	4	0.02632	4.54515	0.0241145	-0.074587	1.45754	3.85849	3.82687	0.839528	0.889663	1.15019	147.925	0.0178397	Inactive	-1	-1	-1
166	CHEMBL1796537	2.04927	14	0	0	0	0.0231572	0.0801138	1.30615	3.68279	3.44645	0.968676	1.09854	0.83453	150.071	0	Inactive	-1	-1	-1
167	CHEMBL2087257	1.95598	1	3	0	4.9305	0.0395263	-0.160847	0.969506	3.59796	3.31183	0.800079	1.04783	0.49515	155.062	0.0625	Inactive	-1	-1	-1
168	CHEMBL221432	2.11513	14	0	0.02083	0	0.0217956	0.00618321	1.45891	3.6855	3.41551	0.776284	0.971005	0.93953	147.348	0	Inactive	-1	1	-1
169	CHEMBL169	2.10067	4	0	0	11.1889	0.0390037	-0.192431	1.01357	3.73553	3.55136	0.807651	0.975312	0.54658	150.175	0.505147	Inactive	-1	-1	-1
170	CHEMBL270445	2.11104	15	0	0	4.03938	0.0306225	-0.115538	1.27375	3.8819	3.77698	0.895238	0.90935	0.96208	149.363	0.0508588	Inactive	-1	-1	-1
171	CHEMBL1668536	1.99827	11	0	0	0	0.0241981	-0.142603	1.18689	3.70429	3.24952	0.929125	0.916539	0.85583	155.015	0	Inactive	-1	-1	-1
172	CHEMBL489140	2.11998	3	0	0	14.127	0.0445092	-0.121043	0.969218	3.73202	3.55357	0.918052	1.05647	0.35232	150.973	0.558634	Inactive	-1	-1	-1
173	CHEMBL422	2.11741	0	1	0	9.90438	0.0461548	-0.140685	0.862578	3.4869	3.31922	0.903728	0.988524	0.38423	150.439	0.184525	Inactive	-1	-1	-1
174	CHEMBL1780194	1.885	7	2	0	1.27903	0.0290782	0.0841561	1.21284	3.67569	3.5455	0.839945	1.11966	0.89155	157.513	0	Inactive	-1	-1	-1
175	CHEMBL3260206	1.97294	7	2	0	0	0.040679	0.0103384	1.13407	3.56156	3.06463	1.08483	1.25483	0.50781	149.04	0	Inactive	-1	-1	-1
176	CHEMBL2408992	1.80203	8	2	0.0625	1.24474	0.0203282	0.0526337	1.34533	3.56366	3.31593	0.565446	0.9237	1.05318	160.769	0.00449958	Inactive	-1	-1	-1
177	CHEMBL472940	1.53532	0	1	0	0	0.0273503	0.400682	0.942533	2.94699	2.52877	1.37871	1.64591	0.7175	170.43	0	Inactive	-1	-1	-1
178	CHEMBL2377308	1.98588	12	5	0.03333	3.87178	0.0195891	-0.086624	1.24823	3.65329	3.43806	0.699587	0.827578	1.0489	151.483	0.025222	Inactive	-1	-1	-1
179	CHEMBL305419	1.89442	13	2	0.06818	0	0.0223398	-0.197138	1.34583	3.47889	3.20392	0.661555	0.693432	1.00054	150.432	0	Inactive	-1	-1	-1
180	CHEMBL3601831	1.85474	6	0	0.16667	0	0.0350995	-0.0515652	1.23423	2.85622	2.2245	0.601512	0.672607	0.67198	140.889	0	Inactive	-1	-1	-1
181	CHEMBL3633235	1.99644	7	3	0	3.51498	0.0257296	-0.16818	1.09049	3.50034	3.20047	0.87716	0.740885	0.77084	153.625	0.0372324	Inactive	-1	-1	-1
182	CHEMBL2261396	2.15205	0	0	0	17.774	0.0512253	-0.118529	0.96447	3.732	3.50057	0.930135	1.03423	0.11338	150.71	0.719054	Inactive	-1	-1	-1
183	CHEMBL3127938	1.93245	10	2	0.03659	0	0.0238349	-0.0192243	1.34965	3.81101	3.59295	0.916584	0.785624	1.0893	162.347	0	Inactive	-1	-1	-1
184	CHEMBL2207697	1.97312	16	2	0	1.90965	0.0240106	-0.00487979	1.33351	3.91785	3.8122	0.768585	0.909964	1.16754	155.084	0	Inactive	-1	-1	-1
185	CHEMBL1164344	2.10702	7	2	0	9.22661	0.039595	-0.193588	1.11235	3.80054	3.60446	0.759547	0.945475	0.80378	154.532	0.200102	Inactive	-1	-1	-1
186	CHEMBL1214231	1.95838	5	2	0	1.59757	0.0318882	-0.0678518	1.11143	3.61228	3.4809	0.871471	1.082	0.73426	148.185	0.0226805	Inactive	-1	-1	-1
187	CHEMBL3343685	2.04848	6	0	0	2.20465	0.0254739	0.023726	1.18577	3.50623	3.31781	0.634718	0.840106	0.84842	148.233	0.051031	Inactive	-1	-1	-1
188	CHEMBL1796564	2.01364	15	4	0.03125	0	0.0235177	-0.1119	1.45609	3.88221	3.4922	0.741724	0.9053	1.00743	149.564	0	Inactive	-1	-1	-1
189	CHEMBL3325601	1.89328	10	0	0.01923	0	0.0276118	0.0943166	1.17612	3.6552	3.47133	0.947798	0.923274	0.9162	158.88	0	Inactive	-1	-1	-1
190	CHEMBL1834946	2.15617	9	1	0.02941	5.12854	0.0393807	-0.093801	0.957148	3.78953	3.56054	0.830888	1.03348	0.80238	148.884	0.147856	Inactive	-1	-1	-1
191	CHEMBL487518	1.94557	21	0	0.025	2.12644	0.0243989	-0.00802025	1.47455	3.90001	3.78967	0.7258	1.02003	1.30259	150.921	0.00449958	Inactive	-1	-1	-1
192	CHEMBL332478	2.00844	6	4	0	0	0.0248748	-0.0247941	1.26445	3.66327	3.49163	0.858547	0.918474	0.88394	153.712	0	Inactive	-1	-1	-1
193	CHEMBL11301	1.91064	9	1	0	1.9151	0.0296016	-0.00276678	1.05729	3.65715	3.38769	0.794106	1.03305	0.90682	158.873	0.00449958	Inactive	-1	-1	-1
194	CHEMBL397752	2.09119	4	2	0	15.6916	0.0379478	-0.0985086	1.035	3.69793	3.46948	0.929846	1.13838	0.29426	150.017	0.33017	Inactive	-1	-1	-1
195	CHEMBL401493	1.99131	15	2	0.01515	0	0.0206103	-0.0782775	1.40437	3.86308	3.6323	0.704782	0.823521	1.23211	154.307	0	Inactive	-1	-1	-1
196	CHEMBL1278028	2.11936	7	5	0.05769	0	0.0228719	-0.146309	1.16037	3.57583	3.29647	0.85211	0.630813	0.90742	155.445	0	Inactive	-1	-1	-1
197	CHEMBL593010	2.07796	10	0	0.04545	0	0.0243807	-0.22171	1.12311	3.65049	3.27793	0.782824	0.963373	0.99742	150.287	0	Inactive	-1	-1	-1
198	CHEMBL65260	1.84998	6	2	0.10714	0	0.0233732	-0.173529	0.928039	3.18448	3.11161	0.85123	0.835859	0.8442	162.034	0	Inactive	-1	-1	-1
199	CHEMBL234754	2.10156	9	2	0	0	0.0332349	-0.0739799	1.21566	3.67359	3.39874	0.878834	1.02184	0.7544	145.799	0	Inactive	-1	-1	-1
200	CHEMBL2391944	1.80999	5	3	0.02273	1.85454	0.0284897	-0.115553	1.35858	3.48344	3.30757	0.748459	0.802216	0.86987	167.781	0.0147109	Inactive	-1	-1	-1
201	CHEMBL2314391	1.86331	1	3	0	0	0.0273799	-0.10825	1.10185	3.63101	3.53525	1.04524	1.34181	0.96778	164.391	0	Inactive	-1	-1	-1
202	CHEMBL2314141	1.85748	15	5	0	0	0.0362969	0.00396925	1.35732	3.86243	3.68985	1.07607	1.01532	1.02156	152.05	0	Inactive	-1	-1	-1
203	CHEMBL3143777	1.70965	2	2	0.02273	1.46807	0.0281006	0.140135	1.28326	3.58546	3.29639	0.754219	0.974471	0.80582	165.143	0.00449958	Inactive	-1	-1	-1
204	CHEMBL253757	2.09503	3	2	0	6.64337	0.0441393	-0.196482	1.03273	3.63269	3.3386	0.887439	0.924886	0.55723	152.823	0.195602	Inactive	-1	-1	-1
205	CHEMBL528061	2.1322	22	1	0	0	0.022508	-0.0694217	1.60999	3.93542	3.72557	0.837559	0.977197	1.18222	141.086	0	Inactive	-1	-1	-1
206	CHEMBL401812	1.92316	14	6	0.04839	0	0.0234032	-0.163676	1.35292	3.85627	3.47202	0.900581	0.89245	0.97436	153.759	0	Inactive	-1	-1	-1
207	CHEMBL1774613	1.78167	0	0	0	0	0.0631272	-0.0112605	1.31257	3.68023	3.61857	0.796729	0.878412	0.7602	162.87	0	Inactive	-1	-1	-1
208	CHEMBL1289454	2.06322	11	3	0.05769	1.20819	0.0215699	-0.0855403	1.61287	3.51427	3.26092	0.438434	0.476665	1.03281	155.122	0.0728931	Inactive	-1	-1	-1
209	CHEMBL2377301	1.95535	5	3	0.02273	0	0.0383229	-0.0236421	1.15505	3.61645	3.17967	1.12871	0.956086	0.61685	157.84	0	Inactive	-1	-1	-1
210	CHEMBL2314403	1.96015	6	2	0	4.47111	0.0237377	0.0380771	1.12574	3.53474	3.31856	0.71948	0.919625	0.7067	149.011	0.0177824	Inactive	-1	-1	-1
211	CHEMBL1950990	1.89216	9	4	0.0625	1.19055	0.02114	-0.0765602	1.30857	3.32464	3.24591	0.597303	0.663065	0.97983	154.247	0.0337918	Inactive	-1	-1	-1
212	CHEMBL1668527	2.11626	2	1	0	5.75613	0.0439844	-0.161529	0.93277	3.54743	3.40824	0.847674	1.06353	0.45712	150.851	0.119242	Inactive	-1	-1	-1
213	CHEMBL539074	2.12929	13	0	0	1.8333	0.0228724	0.015005	1.93106	3.54732	3.43394	0.406351	0.736206	0.99317	143.998	0.0728931	Inactive	-1	-1	-1
214	CHEMBL3260208	1.972	11	2	0.04348	1.38918	0.0209696	0.00439634	1.89473	3.51399	3.19061	0.417121	0.671407	0.96664	151.367	0.0728931	Inactive	-1	-1	-1
215	CHEMBL495825	1.86809	5	1	0.02174	0	0.0429387	-0.174889	1.02188	3.64162	3.35916	1.15168	0.982739	0.58527	163.605	0	Inactive	-1	-1	-1
216	CHEMBL1215308	1.97531	6	1	0.03846	1.4404	0.0217436	0.0848453	1.11756	3.54549	3.33826	0.736411	0.956472	0.99385	152.536	0	Inactive	-1	-1	-1
217	CHEMBL291727	1.84644	3	0	0.02941	0	0.0444959	-0.115156	0.945374	3.56043	3.1556	1.13914	1.12777	0.50899	161.688	0	Inactive	-1	-1	-1
218	CHEMBL236537	2.08163	20	0	0.01613	0	0.0301755	-0.0453143	1.72441	3.85451	3.52102	0.932585	0.999259	1.17629	139.054	0	Inactive	-1	-1	-1
219	CHEMBL2087244	1.95806	11	2	0.03226	3.02567	0.0223126	0.0393625	1.30708	3.70925	3.57818	0.691913	0.948925	1.12372	149.382	0.0150352	Inactive	-1	-1	-1
220	CHEMBL236766	2.00446	14	1	0.01613	0	0.0261479	-0.0540884	1.42653	3.8372	3.65844	0.758387	0.882689	1.12795	151.991	0	Inactive	-1	-1	-1
221	CHEMBL1928649	1.94225	4	3	0	2.69663	0.0322936	0.09256	1.22553	3.56345	3.23275	0.935974	1.02861	0.50799	152.843	0.0240563	Inactive	-1	-1	-1
222	CHEMBL405015	1.97003	7	0	0.03125	0	0.0275622	-0.0468021	1.14074	3.43689	3.17159	1.06377	1.11519	0.71659	153.474	0	Inactive	-1	-1	-1
223	CHEMBL456407	1.92059	9	1	0.02273	3.95165	0.0244818	-0.198368	1.24657	3.60999	3.27692	0.858471	0.86561	0.89349	152.774	0.0227062	Inactive	-1	-1	-1
224	CHEMBL1213365	1.94528	18	2	0.025	0	0.0186313	-0.0933643	1.52719	3.84906	3.63878	0.62833	0.850323	1.27218	155.879	0	Inactive	-1	-1	-1
225	CHEMBL474359	2.06384	13	0	0.02	1.70369	0.0226302	-0.0433659	1.82775	3.52443	3.41384	0.419241	0.778255	1.01077	146.447	0.0728931	Inactive	-1	-1	-1
226	CHEMBL553210	1.81331	1	0	0.02273	0.142857	0.0364063	-0.452038	1.58034	3.41764	3.23616	0.593084	0.687895	0.9543	167.195	0.00269975	Inactive	-1	-1	-1
227	CHEMBL2431495	1.80642	0	1	0	0	0.03556	0.0591408	1.16204	3.46348	3.00862	0.925738	1.22257	0.45727	152.363	0	Inactive	-1	-1	-1
228	CHEMBL2374207	1.93818	20	2	0	0	0.0177008	-0.0241902	1.51746	3.88715	3.75798	0.795953	0.893304	1.36371	155.396	0	Inactive	-1	-1	-1
229	CHEMBL1944818	2.01219	16	2	0.04688	0	0.0200096	-0.0833354	1.27398	3.77649	3.53568	0.75413	0.88509	1.23601	145.768	0	Inactive	-1	-1	-1
230	CHEMBL91489	1.90223	13	4	0	0	0.0245457	-0.109942	1.31649	3.87015	3.52337	0.9091	1.04781	0.95156	150.132	0	Inactive	-1	-1	-1
231	CHEMBL1253844	2.04207	16	2	0	0	0.0252891	-0.00829714	1.39471	3.86355	3.75516	0.802214	0.943194	1.43416	151.561	0	Inactive	-1	-1	-1
232	CHEMBL552929	1.96961	11	0	0.06522	1.24991	0.0232866	0.185792	2.1125	3.51654	3.18685	0.446274	0.670628	0.96318	148.374	0.0728931	Inactive	-1	-1	-1
233	CHEMBL2337376	2.05675	11	0	0	0	0.0232977	-0.229852	1.26821	3.7094	3.36553	0.799657	0.990065	1.07676	146.869	0	Inactive	-1	1	-1
234	CHEMBL230955	1.57956	1	1	0	0	0.0256302	0.0183434	1.37744	3.21117	3.04428	0.544597	0.648187	0.67852	158.238	0	Inactive	-1	-1	-1
235	CHEMBL1289101	1.91025	12	3	0.05769	1.90385	0.0227229	-0.226565	1.21403	3.52317	3.27881	0.707983	0.716147	1.10926	160.415	0.00449958	Inactive	-1	-1	-1
236	CHEMBL2408994	1.75127	4	2	0	0	0.026973	0.0712432	1.16966	3.70211	3.52348	0.910191	1.16575	0.78621	161.818	0	Inactive	-1	-1	-1
237	CHEMBL195034	1.92897	9	0	0.04545	3.70107	0.0260863	-0.226441	1.44248	3.60994	3.25755	0.578331	0.752924	0.89549	149.884	0.0227062	Inactive	-1	-1	-1
238	CHEMBL608137	2.1662	1	1	0	15.7236	0.0442912	-0.141002	0.99679	3.74084	3.49555	0.834831	0.998651	0.38209	150.747	0.598828	Inactive	-1	-1	-1
239	CHEMBL21408	1.89166	0	2	0	2.64908	0.0482119	-0.0136908	0.895727	3.45432	3.30429	1.00615	1.34794	0.25757	156.117	0	Inactive	-1	-1	-1
240	CHEMBL3115726	1.82752	2	0	0.02778	0	0.0255508	0.120493	1.3184	3.73097	3.64061	1.02193	1.06571	0.87938	163.695	0	Inactive	-1	-1	-1
241	CHEMBL477053	1.88348	5	2	0.02941	1.65096	0.0744392	-0.0957187	1.78448	3.34324	2.9428	0.754578	0.914051	0.76992	159.135	0.00449958	Inactive	-1	-1	-1
242	CHEMBL493786	1.99269	15	2	0.07692	0	0.026961	-0.134413	1.44481	3.59645	3.4165	0.690098	0.787784	1.04948	147.581	0	Inactive	-1	-1	-1
243	CHEMBL139856	2.12697	9	2	0.025	5.51641	0.0379319	-0.0501871	1.01155	3.80004	3.68799	0.982243	0.979054	0.67435	154.863	0.137716	Inactive	-1	-1	-1
244	CHEMBL1215307	2.04781	10	0	0	3.35636	0.02144	0.157869	1.87153	3.51827	3.34238	0.375338	0.661566	1.03266	156.207	0.0773927	Inactive	-1	-1	-1
245	CHEMBL378957	1.94976	10	0	0.05882	0	0.0816467	-0.016933	2.51825	3.16689	3.05975	0.570519	0.60528	0.60615	143.415	0	Inactive	-1	-1	-1
246	CHEMBL561221	2.03841	17	2	0	5.83483	0.0246971	0.00867433	1.35805	3.78211	3.75364	0.889811	1.04564	1.28106	151.116	0.03125	Inactive	-1	-1	-1
247	CHEMBL2047183	1.93473	11	3	0.04839	0	0.021942	-0.237971	1.21179	3.71045	3.44488	0.792888	0.713828	1.09285	160.997	0	Inactive	-1	-1	-1
248	CHEMBL2087265	2.10647	1	2	0	6.13276	0.0464031	-0.135924	0.927944	3.63232	3.37437	0.87425	0.967908	0.55719	152.243	0.136428	Inactive	-1	-1	-1
249	CHEMBL1076120	1.91914	18	5	0.05	0	0.0250417	-0.151922	1.22562	3.83396	3.74636	0.902812	0.819743	1.12712	156.068	0	Inactive	-1	-1	-1
250	CHEMBL3218314	1.81382	5	3	0	7.9941	0.0306521	-0.0322178	1.07484	3.58853	3.40493	0.866619	1.25829	0.6651	152.993	0	Inactive	-1	-1	-1
251	CHEMBL454553	1.80825	4	0	0	3.22507	0.0301557	0.0468198	1.04765	3.67202	3.41644	0.754042	1.10302	0.8669	161.649	0.0501431	Inactive	-1	-1	-1
252	CHEMBL2431481	2.02101	8	0	0.10714	0	0.031373	-0.0947789	1.65003	3.09656	2.86963	0.569203	0.563694	0.72292	145.741	0	Inactive	-1	-1	-1
253	CHEMBL1172329	2.03329	10	0	0	1.17203	0.0289506	0.117018	2.2629	3.50763	3.13866	0.44452	0.648461	0.85476	146.719	0.0728931	Inactive	-1	-1	-1
254	CHEMBL139118	1.97466	13	4	0.07692	0	0.0231918	-0.161166	1.23587	3.47195	3.40884	0.910404	0.756557	1.09259	153.672	0	Inactive	-1	-1	-1
255	CHEMBL253896	1.93156	11	2	0.07692	0	0.0247079	-0.220629	1.26515	3.81299	3.23419	0.823487	0.913847	1.02016	154.29	0	Inactive	-1	-1	-1
256	CHEMBL3218333	2.08107	7	2	0	7.46066	0.0259147	-0.00401076	1.08323	3.56116	3.43224	0.659556	0.817245	0.92288	148.767	0.10303	Inactive	-1	-1	-1
257	CHEMBL2377317	1.97954	7	1	0.06522	0	0.0365534	0.0625502	1.48125	3.56748	3.39736	0.537955	0.590314	0.64844	156.604	0	Inactive	-1	-1	-1
258	CHEMBL3827168	1.85732	5	2	0.02273	1.76482	0.0590307	0.128728	1.46953	3.56648	3.30757	0.704726	0.992491	0.75692	160.949	0.00449958	Inactive	-1	-1	-1
259	CHEMBL356284	1.87052	7	4	0.01724	4.29954	0.031265	-0.149102	1.06663	3.68255	3.45024	0.90369	1.07013	0.65272	152.291	0.0656986	Inactive	-1	-1	-1
260	CHEMBL541678	1.69966	0	1	0.02174	0.666198	0.0314461	0.138092	1.20699	3.67932	3.44362	0.790761	1.04513	0.75026	160.93	0	Inactive	-1	-1	-1
261	CHEMBL1950411	1.96951	10	3	0.04545	0	0.0230864	-0.179593	1.14323	3.47616	3.24265	0.818862	0.817433	0.93627	151.91	0	Inactive	-1	-1	-1
262	CHEMBL1214160	2.05942	21	2	0.06579	0	0.0230592	-0.166391	1.46934	3.87686	3.79031	0.630168	0.761799	1.23001	149.187	0	Inactive	-1	-1	-1
263	CHEMBL488145	1.96548	16	1	0.02778	4.1848	0.0240421	-0.136724	1.35178	3.84414	3.57154	0.624941	0.874565	1.1412	160.543	0.00449958	Inactive	-1	-1	-1
264	CHEMBL551262	1.88585	6	0	0.01724	2.94711	0.0180249	0.141541	1.17195	3.70641	3.43047	0.575843	0.870672	1.25668	167.681	0.00899915	Inactive	-1	-1	-1
265	CHEMBL18331	1.99011	7	2	0.03226	2.71998	0.0316565	-0.168672	1.23551	3.71024	3.59443	0.765835	1.01251	0.83945	150.433	0	Inactive	-1	-1	-1
266	CHEMBL1213551	2.10121	15	1	0.02273	0	0.0255459	-0.230737	1.28939	3.53586	3.35	0.916497	0.910303	1.0048	144.611	0	Inactive	-1	-1	-1
267	CHEMBL558528	1.98779	11	6	0.09259	0	0.0193511	-0.186803	1.23152	3.49527	3.21541	0.780808	0.545904	1.12406	156.934	0	Inactive	-1	-1	-1
268	CHEMBL218125	1.80655	13	4	0.02439	1.72462	0.0213454	-0.055272	1.27015	3.85611	3.75661	0.878945	1.21189	1.24536	150.739	0.0241671	Inactive	-1	-1	-1
269	CHEMBL3262109	2.05019	12	0	0.0303	1.58933	0.0214221	-0.11421	1.65408	3.81914	3.64553	0.578	0.691943	1.4134	157.119	0.0176675	Inactive	-1	-1	-1
270	CHEMBL1008	2.13286	4	2	0	11.2784	0.0300509	-0.102357	0.954644	3.79	3.52095	0.739642	0.920402	0.72687	149.394	0.458516	Inactive	-1	-1	-1
271	CHEMBL30	1.86885	4	0	0	0	0.0385237	-0.0794681	1.18208	3.25945	3.08644	0.953667	1.01195	0.60151	160.203	0	Inactive	-1	-1	-1
272	CHEMBL2041975	1.95988	10	0	0.02	3.10518	0.0215751	0.067193	1.93687	3.52146	3.35551	0.38681	0.712312	1.02788	158.285	0.0773927	Inactive	-1	-1	-1
273	CHEMBL3581292	1.7996	0	0	0	0	0.0984614	-0.00591396	0.94075	3.63909	3.45681	1.27333	1.51372	0.17702	156.178	0	Inactive	-1	-1	-1
274	CHEMBL2314406	1.92918	12	0	0.11765	0	0.0836766	-0.213735	2.84151	2.95712	2.84492	0.618112	0.636742	0.66481	137.509	0	Inactive	-1	-1	-1
275	CHEMBL597625	1.86069	14	4	0.03488	0	0.0228695	-0.113019	1.2279	3.87057	3.80844	0.854463	0.923596	1.18344	156.411	0	Inactive	-1	-1	-1
276	CHEMBL1214432	1.93694	5	0	0	1.53653	0.0268427	0.126502	1.73021	3.51201	3.17942	0.431438	0.557654	0.76617	161.011	0.0728931	Inactive	-1	-1	-1
277	CHEMBL2377316	2.04262	9	2	0.02381	0	0.0225766	0.024492	1.2885	3.58206	3.24724	0.878646	0.710099	0.95687	154.231	0	Inactive	-1	-1	-1
278	CHEMBL2435699	1.93994	5	1	0	4.06766	0.0307944	-0.0304888	1.14816	3.61057	3.37656	0.84228	1.04437	0.72015	155.933	0	Inactive	-1	-1	-1
279	CHEMBL1214755	1.93587	7	0	0.02632	2.24958	0.0354158	0.228182	2.09457	3.46244	3.02311	0.762098	0.680645	0.40442	149.31	0	Inactive	-1	-1	-1
280	CHEMBL1235	1.9779	5	5	0	0	0.0242321	-0.0607962	1.26489	3.55422	3.46561	0.821647	0.812694	0.87856	155.916	0	Inactive	-1	-1	-1
281	CHEMBL1213509	1.95628	17	0	0.05556	0	0.0244203	-0.110485	1.70155	3.82472	3.35722	0.86428	1.00403	1.09077	144.336	0	Inactive	-1	-1	-1
282	CHEMBL1214554	1.78771	5	0	0.11538	0	0.0180428	-0.308318	0.750169	2.94908	2.75076	0.579843	1.27281	0.91099	151.275	0	Inactive	-1	-1	-1
283	CHEMBL440898	2.09547	3	1	0.01613	5.64657	0.0428495	-0.00911652	0.977443	3.79009	3.4796	1.01493	1.02828	0.46256	153.912	0.137716	Inactive	-1	-1	-1
284	CHEMBL320546	2.17714	8	0	0	0	0.0283758	-0.105395	1.11259	3.59284	3.24336	0.842973	0.960846	0.82272	143.959	0	Inactive	-1	-1	-1
285	CHEMBL1770923	1.90089	5	0	0	1.91303	0.0437006	-0.179948	1.32098	3.58768	3.32933	0.910454	1.19096	0.89546	156.266	0.140287	Inactive	-1	-1	-1
286	CHEMBL468255	1.96155	12	2	0.06667	0	0.028045	-0.141579	1.11748	3.62265	3.49215	0.837083	0.932809	0.91413	157.585	0	Inactive	-1	1	-1
287	CHEMBL1916916	2.11983	8	4	0.01389	6.76629	0.0383783	-0.213485	1.06602	3.80055	3.61725	0.847307	0.91749	0.8256	152.384	0.195602	Inactive	-1	-1	-1
288	CHEMBL2431509	1.95822	13	1	0.02778	0	0.0231712	-0.0153748	1.30092	3.83899	3.64927	0.853724	1.01621	1.15578	155.401	0.00849986	Inactive	-1	-1	-1
289	CHEMBL3262112	2.09932	7	0	0.02273	0	0.0224279	-0.256885	1.39362	3.73313	3.48852	1.03604	1.0573	1.07817	147.805	0.0169997	Inactive	-1	-1	-1
290	CHEMBL3343682	1.82656	2	2	0	7.34366	0.046187	-0.0401505	1.00839	3.77261	3.63193	0.923247	1.24255	0.40473	154.651	0.12724	Inactive	-1	-1	-1
291	CHEMBL341729	2.06173	14	1	0.01563	6.60774	0.0260963	0.134481	1.36039	3.80134	3.74389	1.01118	0.886257	1.09401	152.342	0.0372678	Inactive	-1	-1	-1
292	CHEMBL2253272	2.05509	20	4	0	0	0.0367685	-0.0345483	1.38135	3.86807	3.83981	1.14705	1.05845	0.96436	147.678	0	Inactive	-1	-1	-1
293	CHEMBL3104743	1.75581	1	0	0	0.766309	0.0312118	0.183319	1.00875	3.36371	2.70424	0.845903	1.0258	0.50642	160.298	0.0559017	Inactive	-1	-1	-1
294	CHEMBL586864	1.73074	0	0	0	1.31863	0.0559941	0.0142347	1.04694	3.55549	3.34326	1.24231	1.4004	0.5001	158.593	0.0456435	Inactive	-1	-1	-1
295	CHEMBL32	1.89615	11	4	0.03704	1.1128	0.0219006	-0.0293901	1.38051	3.73429	3.36759	0.739605	0.914317	1.03185	152.146	0	Inactive	-1	-1	-1
296	CHEMBL518529	2.13205	3	1	0	11.314	0.0425378	-0.099609	1.01605	3.73206	3.55233	0.911039	1.00676	0.37229	151.974	0.55221	Inactive	-1	-1	-1
297	CHEMBL220481	2.14337	4	1	0.02857	2.25463	0.0362955	0.143323	1.30778	3.87384	3.47578	0.823794	0.983455	0.94105	159.733	0.00449958	Inactive	-1	-1	-1
298	CHEMBL236690	1.86539	3	0	0	1.67081	0.0596788	-0.108743	1.14335	3.5664	3.21406	0.772391	0.933744	0.42485	152.017	0.0441942	Inactive	-1	-1	-1
299	CHEMBL3581789	2.05777	17	1	0	0	0.0229408	-0.0423277	1.50272	3.71877	3.3918	0.8523	1.03733	1.02416	140.802	0	Inactive	-1	-1	-1
300	CHEMBL1214224	1.98005	7	0	0.02174	1.78549	0.0223916	-0.191835	1.26094	3.50034	3.29816	0.582653	0.850116	0.96253	144.846	0.0277496	Inactive	-1	-1	-1
301	CHEMBL1611210	1.93953	2	3	0	1.16162	0.0370269	0.110813	1.15319	3.6788	3.62949	0.83975	1.25994	0.87545	158.347	0	Inactive	-1	-1	-1
302	CHEMBL1289704	1.95139	19	2	0.05769	0	0.0224604	-0.111696	1.63444	3.79318	3.41858	0.609242	0.933933	1.06873	141.783	0	Inactive	-1	-1	-1
303	CHEMBL2087267	1.60084	1	1	0	0	0.0161293	-0.326537	0.961683	3.22659	2.82203	0.808954	0.680786	0.77676	170.685	0	Inactive	-1	-1	-1
304	CHEMBL2316670	1.98026	9	0	0.04	0	0.0245028	-0.240723	1.4976	3.80649	3.37797	0.533818	0.681644	1.01389	154.041	0	Inactive	-1	1	-1
305	CHEMBL1822441	1.99307	10	0	0.01923	0	0.0391131	-0.0667337	1.28434	3.77985	3.49817	1.16611	1.54677	0.92957	148.089	0.0204226	Inactive	-1	-1	-1
306	CHEMBL1213792	1.97207	13	5	0.08929	0	0.0228062	-0.202522	1.22269	3.5099	3.38286	0.894608	0.68889	1.11157	155.645	0	Inactive	-1	-1	-1
307	CHEMBL137817	2.14946	11	2	0.03571	3.70076	0.0341428	-0.146205	1.24473	3.77998	3.37864	0.916865	0.828699	0.87937	153.079	0.0790569	Inactive	-1	-1	-1
308	CHEMBL444605	2.00814	16	1	0.04839	0	0.0198357	-0.0126477	1.31696	3.77633	3.52931	0.72255	0.983039	1.24541	143.118	0	Inactive	-1	-1	-1
309	CHEMBL93307	1.88048	6	5	0.06522	0.572357	0.020394	-0.0912468	1.19781	3.40962	3.20574	0.657431	0.69901	0.99642	158.639	0	Inactive	-1	-1	-1
310	CHEMBL446646	1.96526	10	0	0	4.99734	0.0384521	-0.046714	1.11133	3.75305	3.3492	1.10654	0.999424	0.6814	151.913	0.0294628	Inactive	-1	-1	-1
311	CHEMBL2402093	1.92689	6	0	0.02174	1.95124	0.0315871	-0.0433579	1.10499	3.61626	3.34006	0.815943	0.997086	0.8093	162.537	0.00449958	Inactive	-1	-1	-1
312	CHEMBL139702	2.01493	11	4	0.05556	3.66802	0.0264183	-0.164065	1.17848	3.55822	3.35529	0.829196	0.834025	0.94499	153.181	0.0555556	Inactive	-1	-1	-1
313	CHEMBL556	2.11548	2	3	0	9.48395	0.0368045	-0.113028	1.01647	3.71032	3.54528	0.797557	0.993499	0.59749	152.019	0.337222	Inactive	-1	-1	-1
314	CHEMBL352195	2.13023	13	1	0	1.62741	0.0218914	-0.0456968	1.5137	3.84304	3.51277	0.778677	0.992659	1.03739	147.887	0.0603103	Inactive	-1	-1	-1
315	CHEMBL453887	1.71788	1	0	0.05	0	0.0195958	-0.406198	0.444613	2.86727	2.30753	0.597273	0.598739	0.75165	163.779	0	Inactive	-1	-1	-1
316	CHEMBL489498	1.80022	5	3	0	0.982313	0.0256238	-0.0809729	0.920736	3.44206	3.24699	0.899359	1.1546	0.73847	156.514	0	Inactive	-1	-1	-1
317	CHEMBL279509	1.91751	7	1	0.0303	3.83001	0.0358467	-0.0475268	1.16439	3.68357	3.59901	0.960739	1.10152	0.71586	156.143	0.0197642	Inactive	-1	-1	-1
318	CHEMBL2024105	1.94669	12	2	0	0	0.0259103	-0.0495053	1.26028	3.55462	2.98239	1.02743	1.15954	0.7898	144.888	0	Inactive	-1	-1	-1
319	CHEMBL560600	2.08212	10	2	0.03571	4.17272	0.0365486	-0.212578	1.20222	3.77753	3.38725	0.998828	0.855901	0.81281	155.229	0.0790569	Inactive	-1	-1	-1
320	CHEMBL1172810	2.12119	2	3	0	5.59303	0.0327203	-0.119759	1.06243	3.57522	3.49517	0.731587	0.98683	0.81755	152.866	0.393748	Inactive	-1	1	-1
321	CHEMBL2261395	2.05621	12	1	0	0	0.0325356	-0.0241396	1.27299	3.86885	3.72301	0.975208	1.05571	0.834	150.101	0	Inactive	-1	1	-1
322	CHEMBL516030	1.84561	8	4	0	0	0.0275408	-0.0109647	1.18643	3.71642	3.52368	0.961764	1.16111	0.79376	154.174	0	Inactive	-1	-1	-1
323	CHEMBL419055	2.19794	8	2	0.06818	0	0.0196123	0.0912856	1.41942	3.72939	3.52575	0.505205	0.808589	1.44122	149.266	0	Inactive	-1	-1	-1
324	CHEMBL3218342	2.06341	18	1	0.025	1.46495	0.02286	0.124084	1.44196	3.86342	3.68716	0.791081	0.980993	1.13295	151.779	0.051031	Inactive	-1	-1	-1
325	CHEMBL473520	1.9071	2	2	0	0	0.0595934	-0.00338639	0.977311	3.24204	2.98154	1.15493	1.35263	0.22426	153.186	0	Inactive	-1	-1	-1
326	CHEMBL1272012	1.93684	5	0	0	1.16254	0.0792278	0.202191	1.22838	3.21338	2.77182	0.916898	0.979123	0.36851	148.762	0	Inactive	-1	-1	-1
327	CHEMBL374245	1.90274	10	0	0	0	0.0565561	0.0965229	1.16135	3.64475	3.28556	1.35313	1.19975	0.67002	151.992	0	Inactive	-1	-1	-1
328	CHEMBL1774683	1.84367	11	0	0.05769	3.48613	0.0266748	0.225465	1.40905	3.86966	3.37691	0.644511	0.883806	0.91222	152.672	0	Inactive	-1	-1	-1
329	CHEMBL1094403	2.09186	13	0	0	4.03938	0.0302379	-0.115727	1.23599	3.86398	3.77694	0.929631	0.927722	0.8663	150.393	0.0508588	Inactive	-1	-1	-1
330	CHEMBL1796541	2.002	18	0	0.04688	0	0.0242053	-0.0998571	1.49593	3.88155	3.65354	0.790749	1.02166	1.24298	149.682	0.00849986	Inactive	-1	-1	-1
331	CHEMBL397116	1.7793	2	0	0	0	0.0418434	0.0471336	1.33544	3.06556	2.83015	1.07801	1.14524	0.60997	155.821	0	Inactive	-1	-1	-1
332	CHEMBL218680	1.94837	7	1	0.05	0	0.0307445	-0.13742	1.15038	3.50355	3.27694	0.812463	0.823808	0.75121	158.467	0	Inactive	-1	-1	-1
333	CHEMBL510173	1.99691	6	1	0.05	3.14735	0.0249952	-0.222232	0.960626	3.39795	3.0458	0.813209	0.961651	0.75927	149.592	0.0429923	Inactive	-1	-1	-1
334	CHEMBL1277226	1.83874	5	1	0.02381	0	0.0348312	-0.0793496	1.54696	3.45088	3.35439	0.944146	1.07245	0.73259	149.7	0	Inactive	-1	-1	-1
335	CHEMBL1807210	1.82628	5	1	0	1.26941	0.0398017	0.163496	1.00068	3.51395	3.12295	1.058	1.08213	0.553	157.423	0	Inactive	-1	-1	-1
336	CHEMBL2381687	1.8856	7	2	0	0	0.0203567	-0.321614	1.09378	3.25842	2.9987	0.865514	0.977824	0.78433	151.474	0	Inactive	-1	-1	-1
337	CHEMBL342178	1.94819	5	0	0.03333	0.808206	0.0270462	0.14961	2.3014	3.11498	2.8816	0.404043	0.641964	0.76705	149.984	0.0728931	Inactive	-1	-1	-1
338	CHEMBL296586	2.13153	22	4	0	0	0.0343193	-0.0277066	1.43247	3.86858	3.84008	1.12258	1.03093	1.04011	146.703	0	Inactive	-1	-1	-1
339	CHEMBL1822419	2.01924	19	0	0.01923	0	0.0231762	-0.0984911	1.56537	3.82738	3.46233	0.68465	0.990955	1.08345	145.103	0	Inactive	-1	-1	-1
340	CHEMBL1950997	1.89979	13	1	0.07143	0	0.0176329	-0.0487538	1.36652	3.45254	3.01934	0.607265	1.12727	1.0928	142.653	0	Inactive	-1	-1	-1
341	CHEMBL456938	1.98948	13	0	0.0625	1.71372	0.0260833	0.0169088	1.32989	3.77034	3.5371	0.659702	0.878207	1.09623	153.42	0.0721688	Inactive	-1	-1	-1
342	CHEMBL1097474	1.86131	3	0	0	1.1547	0.0491938	-0.227863	0.949503	3.19849	2.9293	0.708285	0.866889	0.59607	149.26	0.0395285	Inactive	-1	-1	-1
343	CHEMBL1796436	1.93216	0	3	0	3.83484	0.0518849	-0.0533424	1.02046	3.54814	3.40183	1.00873	1.26791	0.30498	156.623	0	Inactive	-1	-1	-1
344	CHEMBL88673	1.97842	11	0	0.04545	1.38918	0.0217711	0.115872	1.96009	3.51664	3.18486	0.401308	0.787567	0.97084	150.535	0.0728931	Inactive	-1	-1	-1
345	CHEMBL8015	1.92535	11	1	0.075	0	0.0186662	-0.0817391	1.3798	3.4244	3.00687	0.678162	1.03986	1.06254	142.543	0	Inactive	-1	-1	-1
346	CHEMBL1668535	1.79935	4	0	0	0	0.0297008	-0.379393	0.952785	3.26153	3.1556	0.902868	1.00258	0.60009	162.894	0	Inactive	-1	-1	-1
347	CHEMBL932	1.8932	11	1	0.025	0	0.0395909	-0.0892861	1.64113	3.66179	3.07343	0.813864	0.93963	0.76209	148.015	0	Inactive	-1	-1	-1
348	CHEMBL557704	1.91439	13	1	0.05263	0	0.0246523	-0.234386	1.29889	3.45862	3.12269	0.850146	0.964088	0.96374	148.354	0	Inactive	-1	-1	-1
349	CHEMBL275078	1.79811	6	4	0.02381	0.72427	0.0188734	-0.0935705	1.38754	3.45331	3.2303	0.657494	0.913643	0.91023	155.811	0	Inactive	-1	-1	-1
350	CHEMBL15321	2.06577	1	1	0	11.5621	0.0447861	-0.116237	0.883429	3.48832	3.31911	0.92973	0.975411	0.35987	150.706	0.144157	Inactive	-1	-1	-1
351	CHEMBL455267	1.96034	14	1	0.04167	1.90056	0.0227928	-0.0285553	1.29168	3.63426	3.37065	0.698416	1.02875	1.00832	145.933	0	Inactive	-1	-1	-1
352	CHEMBL1939607	1.91626	5	1	0.03571	0	0.0273845	-0.257847	0.849729	3.1733	2.86334	1.08788	1.33521	0.82542	154.843	0.00913328	Inactive	-1	-1	-1
353	CHEMBL118990	2.05297	9	0	0	2.96768	0.0234362	-0.0495467	1.22425	3.67441	3.52828	0.728013	0.963734	1.01474	148.515	0.0476126	Inactive	-1	-1	-1
354	CHEMBL549450	1.94006	16	1	0.02632	1.79458	0.0278519	0.115419	1.43604	3.80196	3.74463	0.727779	0.907214	1.14541	153.82	0	Inactive	-1	-1	-1
355	CHEMBL440408	1.91217	5	3	0.11905	0	0.0234203	-0.226183	1.15734	3.28945	3.20574	0.791939	0.676483	0.98861	161.314	0	Inactive	-1	-1	-1
356	CHEMBL1479	2.08195	0	1	0	0	0.0573291	-0.00612859	1.04701	3.46453	3.02362	1.10144	1.09788	0.38083	153.943	0	Inactive	-1	-1	-1
357	CHEMBL242801	1.97278	10	1	0.02273	1.41257	0.0217488	0.139428	2.04344	3.51444	3.19243	0.382723	0.725534	0.9222	149.179	0.0728931	Inactive	-1	-1	-1
358	CHEMBL501847	2.00337	14	0	0.01852	5.36249	0.0297751	0.0700394	1.4092	3.78829	3.67882	0.792348	0.927428	0.95573	148.325	0.0279508	Inactive	-1	-1	-1
359	CHEMBL77966	1.98425	6	1	0.04348	1.56827	0.0210874	0.0523517	1.08313	3.42034	3.21118	0.619191	0.925032	1.00603	149.288	0	Inactive	-1	-1	-1
360	CHEMBL2407191	2.0223	13	0	0.05769	1.00334	0.0284621	0.290582	1.60941	3.68897	3.44381	0.616196	0.841096	0.95843	150.544	0	Inactive	-1	-1	-1
361	CHEMBL270121	1.93019	19	2	0.03226	0	0.022726	-0.0184867	1.49841	3.8261	3.69936	0.940169	1.03397	1.07147	152.36	0	Inactive	-1	-1	-1
362	CHEMBL1210087	1.81092	7	1	0.02778	0	0.0345721	-0.0210006	1.6046	3.43414	3.0414	1.01558	1.14322	0.78719	150.215	0	Inactive	-1	-1	-1
363	CHEMBL9	1.65829	2	3	0	0.635117	0.0231224	0.149324	1.15266	3.62695	3.3817	0.744813	1.17612	0.86054	161.235	0	Inactive	-1	-1	-1
364	CHEMBL1796433	1.8437	0	2	0	0	0.0369878	0.0652724	1.0896	3.73592	3.63679	0.901852	1.24965	0.67157	156.973	0	Inactive	-1	-1	-1
365	CHEMBL1078437	1.85744	1	4	0	2.7016	0.0389233	-0.130196	0.974508	3.57778	3.41101	0.912666	1.18653	0.5359	158.059	0	Inactive	-1	-1	-1
366	CHEMBL558301	1.97239	12	3	0.04	1.75283	0.0211457	-0.000677	1.20083	3.58389	3.37939	0.716898	0.747851	0.94979	151.714	0.0833333	Inactive	-1	-1	-1
367	CHEMBL241509	1.93065	10	2	0.05263	0	0.0245071	-0.158448	1.15803	3.44461	3.0602	0.845953	0.937382	0.84789	149.02	0	Inactive	-1	-1	-1
368	CHEMBL1089741	1.67274	0	0	0	0	0.0597668	-0.0113833	0.927129	3.07248	2.92007	1.04083	1.10458	0.32443	165.956	0	Inactive	-1	-1	-1
369	CHEMBL2087263	2.07116	1	3	0	9.96783	0.0453668	-0.0944208	0.921655	3.71067	3.39364	0.950535	0.966399	0.40642	153.623	0.176335	Inactive	-1	-1	-1
370	CHEMBL243213	1.90643	18	2	0.03846	0	0.0211324	-0.0137331	1.50208	3.81283	3.42703	0.733236	1.05541	1.05556	143.88	0	Inactive	-1	-1	-1
371	CHEMBL151	1.87405	12	0	0.05556	0	0.0226451	-0.134154	1.32136	3.43459	2.97802	0.811272	1.1529	0.99748	145.483	0	Inactive	-1	-1	-1
372	CHEMBL2087242	1.96896	15	3	0.05769	0	0.0246865	-0.178794	1.30149	3.59992	3.41808	0.956401	0.87897	1.04141	150.729	0	Inactive	-1	-1	-1
373	CHEMBL3260218	1.89367	2	2	0	0	0.0554668	0.00195898	1.05641	3.56723	3.11306	1.16413	1.36498	0.20581	151.566	0	Inactive	-1	-1	-1
374	CHEMBL3827146	1.99625	14	2	0.07576	0	0.0216099	-0.0792745	1.2559	3.81908	3.54582	0.711744	1.12468	1.17917	145.154	0	Inactive	-1	-1	-1
375	CHEMBL46328	1.79427	5	1	0.01923	2.53399	0.0252323	0.0427744	1.07717	3.61271	3.41728	0.682694	0.993622	0.93346	164.524	0.0456435	Inactive	-1	-1	-1
376	CHEMBL3577187	1.86522	4	2	0	3.54816	0.0496533	-0.0162493	1.04234	3.75524	3.66113	0.918084	1.19707	0.57497	155.673	0.0671771	Inactive	-1	-1	-1
377	CHEMBL512752	1.96662	18	0	0.07692	0	0.0258131	-0.0561297	1.74408	3.85927	3.4338	0.574086	0.779789	1.0246	146.991	0	Inactive	-1	-1	-1
378	CHEMBL2377294	1.95769	8	1	0.01852	1.20188	0.0231604	-0.0515199	1.14327	3.67213	3.41639	0.776057	0.93003	0.9947	163.888	0.00348536	Inactive	-1	-1	-1
379	CHEMBL265830	1.99988	11	0	0.02632	0	0.0273191	-0.152782	1.47491	3.45502	3.12099	0.530446	0.634231	0.82791	149.243	0	Inactive	-1	-1	-1
380	CHEMBL3759534	2.11685	4	2	0	11.8207	0.0375711	-0.0775611	1.01113	3.7777	3.58718	0.814367	1.00625	0.56588	151.298	0.335131	Inactive	-1	-1	-1
381	CHEMBL3785473	2.10793	11	1	0.03571	1.60913	0.0213254	-0.0272769	1.37541	3.64604	3.34729	0.573266	0.826853	1.29726	157.661	0.00449958	Inactive	-1	-1	-1
382	CHEMBL1950419	2.17326	10	5	0.07317	0	0.0203436	-0.0938158	1.42406	3.72109	3.67727	0.777425	0.750678	1.27026	151.654	0	Inactive	-1	-1	-1
383	CHEMBL3120849	1.76618	1	1	0	0.922708	0.0308195	0.125741	1.06781	3.5881	3.28364	0.765435	1.1158	0.69963	162.403	0	Inactive	-1	-1	-1
384	CHEMBL201510	1.73911	0	4	0	0	0.0319218	-0.0502614	1.00127	3.53143	3.2526	0.999766	1.35184	0.38983	157.667	0	Inactive	-1	-1	-1
385	CHEMBL3344528	1.89279	5	1	0	0	0.0470499	0.0184696	1.0996	3.71884	3.41162	1.09923	1.08873	0.70379	158.574	0	Inactive	-1	-1	-1
386	CHEMBL1923918	2.1015	6	0	0.01852	4.20672	0.0460116	0.0642616	1.00593	3.61096	3.42522	0.867565	1.24348	0.75446	152.519	0	Inactive	-1	-1	-1
387	CHEMBL1215602	1.69679	1	2	0.02273	0	0.0182362	-0.0840931	1.09025	3.48044	3.20064	0.881562	0.863255	0.9143	166.011	0	Inactive	-1	-1	-1
388	CHEMBL53708	1.85845	12	1	0.05263	0	0.0236677	0.0403838	1.39609	3.72337	3.04904	0.960376	1.13624	0.85302	153.763	0	Inactive	-1	-1	-1
389	CHEMBL473527	2.02449	6	0	0.02174	0.75	0.0219858	0.033736	0.99599	3.5504	3.23152	0.603754	0.819807	0.83236	158.007	0	Inactive	-1	-1	-1
390	CHEMBL359965	1.86014	0	0	0	0	0.0824416	0.00284123	1.01957	3.75801	3.64138	1.29954	1.30007	0.39273	157.678	0	Inactive	-1	-1	-1
391	CHEMBL72	2.03358	8	4	0	3.88423	0.0254425	-0.128043	1.27724	3.77649	3.47221	0.905258	0.802347	0.93323	153.424	0.0429923	Inactive	-1	-1	-1
392	CHEMBL395061	1.88549	10	1	0	0	0.0336939	-0.0119486	1.06722	3.69746	3.5671	1.05724	1.20223	0.88731	154.402	0	Inactive	-1	-1	-1
393	CHEMBL2316669	1.77212	11	3	0.03125	2.60423	0.0238003	-0.0896115	1.17854	3.77192	3.53482	0.89378	1.30359	1.02013	151.27	0.0107583	Inactive	-1	-1	-1
394	CHEMBL2337383	1.92161	7	1	0.06667	0	0.0271227	-0.00756679	1.3572	3.6867	3.55884	0.692125	0.860377	0.8998	160.905	0	Inactive	-1	1	-1
395	CHEMBL298985	1.90545	6	0	0.02381	1.03633	0.0381248	0.199514	1.26067	3.68743	3.29687	0.778232	0.954154	0.79657	153.611	0.051031	Inactive	-1	-1	-1
396	CHEMBL473324	2.02709	10	3	0.02941	0	0.0327255	-0.0442613	1.22309	3.86082	3.66912	0.963346	1.00264	0.82615	154.044	0	Inactive	-1	1	-1
397	CHEMBL2316650	2.00902	16	3	0.05882	0	0.0202264	-0.0941217	1.22282	3.77669	3.53498	0.752005	0.810806	1.26839	148.129	0	Inactive	-1	-1	-1
398	CHEMBL1214684	2.03584	8	3	0.02083	0	0.0196947	-0.153054	1.32157	3.53069	3.32713	0.685581	0.759737	0.98636	151.05	0	Inactive	-1	-1	-1
399	CHEMBL3343692	1.86366	5	1	0	0	0.0290017	-0.00579655	1.11434	3.6269	3.43715	0.854622	0.956206	0.89941	161.223	0	Inactive	-1	-1	-1
400	CHEMBL487275	2.00981	8	1	0.04348	0	0.0185813	-0.172705	1.24437	3.3891	3.21786	0.561651	0.723177	1.17362	146.633	0	Inactive	-1	-1	-1
401	CHEMBL1796409	1.93284	12	3	0.04	0	0.0234417	-0.0713322	1.28982	3.57935	3.417	0.83823	0.894512	0.92348	151.518	0	Inactive	-1	-1	-1
402	CHEMBL954	1.97514	17	1	0.04545	1.93084	0.0263656	-0.142078	1.40752	3.83865	3.4837	0.635711	0.836938	1.06664	155.467	0	Inactive	-1	-1	-1
403	CHEMBL2207694	2.00117	24	0	0.04545	0	0.0218753	0.0766458	1.55845	3.81256	3.71874	0.617403	0.887783	1.12972	148.84	0	Inactive	-1	-1	-1
404	CHEMBL1078792	1.9167	14	4	0.03571	0	0.0233582	-0.0629177	1.59647	3.83287	3.46701	0.76224	0.854012	0.95208	147.967	0	Inactive	-1	-1	-1
405	CHEMBL3133773	1.89196	16	1	0	0	0.0395744	-0.00765453	1.31682	3.87902	3.81711	1.16341	1.23684	0.97143	150.643	0	Inactive	-1	-1	-1
406	CHEMBL558659	2.04171	20	1	0	0	0.0273338	-0.0411127	1.47241	3.87113	3.80057	0.935104	1.05656	1.23064	148.201	0.00981479	Inactive	-1	-1	-1
407	CHEMBL235528	1.98057	6	1	0.0303	2.12336	0.0228114	0.173158	1.13739	3.70425	3.53328	0.672367	1.06181	0.98967	154.003	0	Inactive	-1	-1	-1
408	CHEMBL209720	2.0247	16	1	0	6.21324	0.0255998	-0.0191683	1.34732	3.78211	3.75364	0.935148	1.06721	1.14964	151.458	0.03125	Inactive	-1	-1	-1
409	CHEMBL3637875	1.90569	10	1	0.02273	2.05295	0.0279066	-0.0196105	1.29257	3.5855	3.32814	0.806835	1.02099	0.9093	159.965	0.00449958	Inactive	-1	-1	-1
410	CHEMBL458027	1.90097	14	0	0.02	1.93749	0.0245636	0.132172	1.51109	3.82344	3.50378	0.811092	0.990692	0.97283	152.06	0.0645497	Inactive	-1	-1	-1
411	CHEMBL68285	1.9667	12	4	0.07407	0	0.0247215	-0.184583	1.37571	3.64799	3.20574	0.745458	0.687873	1.03168	156.058	0	Inactive	-1	-1	-1
412	CHEMBL267930	1.99923	14	0	0.08065	0	0.0255295	-0.0487547	1.29989	3.81339	3.57237	0.756873	1.01505	1.0208	154.917	0	Inactive	-1	1	-1
413	CHEMBL2338361	2.1154	9	2	0	0	0.0247496	-0.0252378	1.2978	3.61687	3.36154	0.911912	0.842713	0.84261	152.287	0	Inactive	-1	-1	-1
414	CHEMBL2391951	2.13127	1	0	0	8.9407	0.0467841	-0.144229	0.865345	3.50372	3.29697	0.938565	0.993463	0.25307	150.559	0.183799	Inactive	-1	-1	-1
415	CHEMBL424284	2.03446	14	0	0.04545	0	0.0285249	-0.127218	1.74305	3.57603	3.29152	0.579511	0.795468	0.98443	141.999	0	Inactive	-1	-1	-1
416	CHEMBL270330	1.70131	4	0	0.03125	1.14298	0.0356337	-0.0354034	1.34784	3.12374	2.88768	0.930027	1.13839	0.77273	151.2	0.0144338	Inactive	-1	-1	-1
417	CHEMBL595713	1.97498	11	0	0	2.41644	0.0370984	-0.015217	1.29444	3.78432	3.45396	0.793026	0.762444	0.84149	161.798	0.00449958	Inactive	-1	-1	-1
418	CHEMBL191881	2.11561	3	0	0	7.49885	0.0420877	-0.112791	0.896376	3.50898	3.31198	0.956044	0.961001	0.42119	150.357	0.116578	Inactive	-1	-1	-1
419	CHEMBL1078791	2.01304	5	3	0.03448	0	0.0264338	-0.0490137	1.16709	3.54146	3.4507	0.725825	0.99813	0.93498	154.119	0	Inactive	-1	-1	-1
420	CHEMBL454152	1.89111	14	2	0	0	0.0247395	-0.0826985	1.23605	3.85771	3.61845	0.896578	1.01909	1.08162	155.84	0	Inactive	-1	-1	-1
421	CHEMBL1214099	2.16805	10	1	0.02174	0	0.0186529	-0.138239	1.3062	3.51145	3.3639	0.662675	0.730402	1.19109	146.539	0	Inactive	-1	-1	-1
422	CHEMBL1081381	1.95264	19	5	0.08571	0	0.0234814	-0.251754	1.27088	3.8536	3.48148	0.866672	0.711779	1.19526	153.248	0	Inactive	-1	-1	-1
423	CHEMBL2377299	2.12299	3	0	0.02381	5.96055	0.0411884	-0.0695773	0.888419	3.47857	3.29514	0.869902	0.955215	0.42573	150.354	0.137716	Inactive	-1	-1	-1
424	CHEMBL138782	1.93576	9	0	0.03571	0	0.0201838	-0.0449985	1.15867	3.21873	2.90721	0.758045	1.02284	0.87758	146.547	0	Inactive	-1	-1	-1
425	CHEMBL245166	1.97003	9	1	0.02174	1.27398	0.0218602	-0.0645171	1.96196	3.51488	3.20748	0.367572	0.678305	0.91245	150.233	0.0728931	Inactive	-1	-1	-1
426	CHEMBL22138	1.97165	9	0	0.02	1.60094	0.0243605	0.0276087	1.22642	3.59725	3.45162	0.660682	0.963615	1.038	151.565	0.0833333	Inactive	-1	-1	-1
427	CHEMBL321034	2.13302	17	0	0.06	0	0.0225459	-0.0284344	1.53765	3.74194	3.37096	0.672175	0.748365	1.05659	150.647	0	Inactive	-1	1	-1
428	CHEMBL31	1.93348	12	6	0.10345	0	0.0252575	-0.100303	1.17829	3.53976	3.39384	0.893874	0.73222	0.98911	158.329	0	Inactive	-1	-1	-1
429	CHEMBL196631	1.95448	7	1	0.01852	0	0.030861	0.032287	1.41193	3.71008	3.56588	0.591057	0.853675	0.97434	152.377	0.00981479	Inactive	-1	-1	-1
430	CHEMBL301624	1.95695	11	1	0	0	0.0379414	-0.0394989	1.19815	3.85481	3.6549	1.0048	1.20062	0.91507	152.08	0	Inactive	-1	-1	-1
431	CHEMBL1929339	1.90986	10	3	0.06818	0	0.0228513	-0.233022	1.19156	3.45165	3.19217	0.89343	0.70004	1.02978	155.623	0	Inactive	-1	-1	-1
432	CHEMBL243214	1.96655	19	2	0.03571	0	0.0264218	-0.188744	1.38764	3.83229	3.47826	0.95008	0.88943	1.07097	147.287	0	Inactive	-1	-1	-1
433	CHEMBL1774618	1.90266	17	1	0	0	0.028002	-0.0129982	1.26695	3.86481	3.71507	0.935099	1.17779	1.18107	149.475	0	Inactive	-1	-1	-1
434	CHEMBL371456	1.95895	15	1	0.01852	0	0.0355668	-0.0750746	1.40466	3.85093	3.52587	0.649564	0.893323	0.90342	149.127	0	Inactive	-1	-1	-1
435	CHEMBL497984	1.99726	19	0	0.03488	0	0.0282463	0.0382988	1.28998	3.88953	3.75849	0.777238	1.06962	1.19532	150.725	0	Inactive	-1	-1	-1
436	CHEMBL3115471	1.89575	5	1	0.02083	1.04913	0.0297746	0.188981	1.38558	3.69371	3.51914	0.8038	1.07256	0.90919	155.009	0	Inactive	-1	-1	-1
437	CHEMBL3581847	2.06545	11	0	0.02381	1.53653	0.0236419	0.0415462	2.04854	3.5097	3.16261	0.415737	0.67813	0.9291	145.736	0.0728931	Inactive	-1	-1	-1
438	CHEMBL394423	2.15309	6	1	0	10.3325	0.0328587	-0.10006	1.03388	3.7533	3.55133	0.726422	0.891381	0.80022	149.149	0.285647	Inactive	-1	-1	-1
439	CHEMBL1213793	1.91808	15	4	0.07692	0	0.0251849	-0.257513	1.19613	3.59971	3.27247	0.915291	0.729028	1.03983	154.519	0	Inactive	-1	-1	-1
440	CHEMBL2087266	1.86344	15	5	0	0	0.0227533	0.0184025	1.38727	3.87164	3.73899	0.94835	1.01988	1.18874	150.603	0	Inactive	-1	-1	-1
441	CHEMBL2315080	1.81143	0	1	0	0	0.0319307	-0.169561	1.00876	3.40983	2.95396	0.923297	1.0117	0.6385	163.549	0	Inactive	-1	-1	-1
442	CHEMBL138129	1.82294	5	2	0.02941	1.61099	0.0220952	-0.250195	1.14004	3.35428	3.18795	0.788437	1.02213	0.88893	168.737	0.00449958	Inactive	-1	-1	-1
443	CHEMBL3343689	1.94298	8	2	0.01786	2.66307	0.0295814	0.0212982	1.04623	3.68066	3.4503	0.927607	0.7611	0.85603	158.953	0.0263523	Inactive	-1	-1	-1
444	CHEMBL597624	1.96447	12	3	0.06	0	0.0252352	-0.200167	1.39637	3.64251	3.17546	0.738705	0.730044	0.94335	154.211	0	Inactive	-1	-1	-1
445	CHEMBL485019	1.94032	4	3	0	1.62009	0.0250834	-0.0604614	1.09058	3.52708	3.34278	0.813644	0.927914	0.8389	153.912	0.0272166	Inactive	-1	-1	-1
446	CHEMBL596442	1.99012	11	3	0.04762	0	0.0210242	-0.198898	1.22972	3.44348	3.14749	0.796663	0.755847	1.00274	149.984	0	Inactive	-1	-1	-1
447	CHEMBL426212	1.95915	8	2	0.03704	0	0.027839	-0.0903585	1.12527	3.67874	3.44344	0.908293	0.993572	0.81725	156.322	0	Inactive	-1	-1	-1
448	CHEMBL134784	1.92938	4	0	0.04167	0	0.0286685	-0.244355	0.946096	3.12602	3.01531	0.742761	0.995141	0.71786	156.332	0	Inactive	-1	-1	-1
449	CHEMBL2164261	1.96801	5	1	0.04545	0	0.0257559	-0.0348128	1.10392	3.47532	3.23341	0.786766	0.957587	0.85679	151.782	0	Inactive	-1	-1	-1
450	CHEMBL595021	2.0978	3	2	0.01613	5.64545	0.0401447	-0.0319806	0.974352	3.7706	3.45459	1.00775	0.978771	0.50956	154.935	0.137716	Inactive	-1	-1	-1
451	CHEMBL37644	2.04794	15	0	0.06897	0	0.0241478	-0.132394	1.42033	3.84587	3.63436	0.651174	0.811479	1.235	153.215	0.0190063	Inactive	-1	-1	-1
452	CHEMBL594178	1.74365	1	0	0	0.57735	0.0281726	0.200559	1.04352	3.45599	2.89806	0.698109	1.08409	0.6694	158.726	0.0559017	Inactive	-1	-1	-1
453	CHEMBL3581800	2.11727	1	0	0	1.63299	0.0412684	-0.065178	1.12576	3.33548	3.02383	0.655954	0.894153	0.44825	153.776	0.142259	Inactive	-1	-1	-1
454	CHEMBL390154	2.04832	15	2	0.0303	2.67563	0.021602	0.105728	1.24057	3.6733	3.49768	0.609474	0.993617	1.08937	148.119	0	Inactive	-1	-1	-1
455	CHEMBL1950988	2.17729	0	0	0	15.9275	0.051329	-0.133664	0.972206	3.72771	3.47573	0.963761	1.00285	0.14298	150.246	0.666349	Inactive	-1	-1	-1
456	CHEMBL447169	1.98697	6	3	0	2.83465	0.0279917	-0.074649	1.29006	3.50691	3.28128	0.726159	0.71632	0.76296	152.926	0.0345033	Inactive	-1	-1	-1
457	CHEMBL604079	1.97484	6	0	0	0	0.0391812	-0.0559714	1.43176	3.72098	3.23586	0.932058	0.81735	0.7107	149.875	0	Inactive	-1	-1	-1
458	CHEMBL1289004	1.77271	6	2	0.04545	0	0.02802	0.0144545	1.12533	3.00026	2.77182	1.19577	1.10279	0.58237	153.527	0	Inactive	-1	-1	-1
459	CHEMBL221581	1.95519	7	1	0.03333	1.94857	0.0275656	-0.164894	1.0685	3.66813	3.44895	0.834608	0.970714	0.8963	159.638	0.0707107	Inactive	-1	-1	-1
460	CHEMBL252930	2.127	3	1	0	14.127	0.0445149	-0.163966	0.973741	3.74164	3.56001	0.939469	1.01008	0.36072	151.974	0.558634	Inactive	-1	-1	-1
461	CHEMBL2408805	1.84636	5	0	0	0	0.0340108	0.0864752	1.0258	3.61921	3.37394	0.901121	1.2787	0.79235	154.255	0	Inactive	-1	-1	-1
462	CHEMBL1807211	1.97938	6	0	0.02273	3.00441	0.0238731	0.142042	1.03867	3.6098	3.31989	0.666253	0.937428	0.83485	163.442	0.00449958	Inactive	-1	-1	-1
463	CHEMBL2088292	2.016	8	0	0.02	0	0.0319155	0.0312649	1.91198	3.78654	3.29267	0.852708	0.997636	1.0485	147.058	0	Inactive	-1	-1	-1
464	CHEMBL1278210	1.9069	4	0	0	1.70347	0.0434805	-0.0125002	1.0593	3.5716	3.25907	0.817755	1.18751	0.65115	159.199	0.00449958	Inactive	-1	-1	-1
465	CHEMBL443418	2.02446	12	1	0.04167	1.54308	0.0194406	0.024753	1.17999	3.58313	3.22141	0.582362	0.841724	1.05276	149.484	0	Inactive	-1	-1	-1
466	CHEMBL258318	1.95172	9	1	0.02273	0	0.0317241	0.0468557	1.10837	3.54544	3.3698	1.04524	0.798871	0.87647	157.476	0	Inactive	-1	-1	-1
467	CHEMBL1215697	1.9741	5	3	0.01471	0	0.0311643	0.017817	1.29624	3.8274	3.60232	0.963556	0.988298	0.85712	159.122	0	Inactive	-1	-1	-1
468	CHEMBL1939605	1.95632	23	3	0.07143	0	0.0224101	-0.162713	1.37998	3.88868	3.70823	0.849667	0.883846	1.21416	151.19	0	Inactive	-1	-1	-1
469	CHEMBL1807625	1.95243	10	0	0	0	0.065132	0.0142385	1.66404	3.29261	3.02434	1.17356	1.23999	0.62582	142.27	0	Inactive	-1	-1	-1
470	CHEMBL397383	1.89086	9	4	0	0	0.0204104	-0.0556814	1.3504	3.43383	3.16379	0.941959	1.05785	0.86852	148.632	0	Inactive	-1	-1	-1
471	CHEMBL498724	2.12786	2	1	0	9.14252	0.0425405	-0.104159	1.0065	3.73114	3.54757	0.929035	0.997775	0.36599	152.153	0.55221	Inactive	-1	-1	-1
472	CHEMBL1917681	2.08646	7	0	0	0	0.0353217	-0.0982398	1.18313	3.49776	3.32861	1.02271	1.04095	0.73028	151.047	0	Inactive	-1	-1	-1
473	CHEMBL1214162	2.12013	8	3	0	6.79405	0.0394185	-0.191189	1.07278	3.80055	3.61632	0.855477	0.963022	0.79391	151.089	0.195602	Inactive	-1	-1	-1
474	CHEMBL447959	1.87824	5	0	0.02273	1.64785	0.0332581	0.0785731	1.7028	3.51933	3.28268	0.453192	0.872228	0.65974	152.937	0.0728931	Inactive	-1	-1	-1
475	CHEMBL1803098	1.54401	0	0	0	0	0.0378928	0.0508784	0.884049	3.20992	2.68856	1.16398	1.41204	0.60075	159.971	0.0129164	Inactive	-1	-1	-1
476	CHEMBL398054	2.01077	13	0	0	0	0.0258179	-0.150765	1.31898	3.56206	3.33078	0.827863	1.10549	1.01336	146.366	0	Inactive	-1	-1	-1
477	CHEMBL1917519	1.78431	5	1	0.01786	2.84885	0.0293145	0.0313008	1.07472	3.66795	3.44222	0.725922	1.0586	0.88082	163.17	0.0456435	Inactive	-1	-1	-1
478	CHEMBL2087262	2.07283	6	2	0.01786	0	0.0386756	-0.12694	1.08094	3.62909	3.44556	0.966244	0.996695	0.67795	152.27	0	Inactive	-1	-1	-1
479	CHEMBL570651	1.94531	9	0	0.02941	0	0.0281404	-0.179195	1.28664	3.28942	3.02261	0.514918	0.702735	0.80406	148.616	0	Inactive	-1	-1	-1
480	CHEMBL594241	1.97983	16	1	0.0122	0	0.0255689	-0.0185455	1.31163	3.88548	3.80081	0.879804	0.916996	1.15162	155.277	0	Inactive	-1	-1	-1
481	CHEMBL1761034	1.95672	5	0	0.02703	0	0.0356169	0.0631716	1.41072	3.80417	3.71404	0.605922	0.851088	0.95785	159.938	0	Inactive	-1	1	-1
482	CHEMBL1434	1.87922	9	0	0.01786	1.53626	0.0296132	0.209432	1.50736	3.82313	3.51375	0.79816	0.859436	0.96727	158.206	0.0645497	Inactive	-1	1	-1
483	CHEMBL245084	1.90584	5	0	0	1.53653	0.0242795	0.30626	1.73548	3.50708	3.07614	0.403143	0.684038	0.7155	155.405	0.0728931	Inactive	-1	-1	-1
484	CHEMBL513747	1.97055	0	9	0	6.43129	0.0314419	-0.100529	0.986096	3.65173	3.57046	0.832593	1.15984	0.41003	153.642	0.0772446	Inactive	-1	-1	-1
485	CHEMBL1097547	2.0449	5	1	0	2.38736	0.0262791	0.0127472	1.1104	3.51071	3.30893	0.703204	0.843239	0.75155	148.536	0.051031	Inactive	-1	-1	-1
486	CHEMBL233429	2.12448	9	1	0.02632	5.51122	0.0393084	-0.0452233	1.009	3.79975	3.68423	0.821609	0.910577	0.66521	153.938	0.137716	Inactive	-1	-1	-1
487	CHEMBL242580	2.10346	16	0	0.05263	0	0.0183878	0.00846875	1.44887	3.84968	3.67826	0.51592	0.809736	1.46763	141.375	0	Inactive	-1	-1	-1
488	CHEMBL489290	1.90939	13	1	0.02778	0	0.024527	0.0149456	1.68774	3.41176	2.93353	0.568757	0.811728	0.88576	140.831	0	Inactive	-1	-1	-1
489	CHEMBL391732	2.15344	2	0	0	10.3022	0.0408746	-0.225792	1.00913	3.64433	3.31739	0.820236	1.004	0.53441	147.915	0.283091	Inactive	-1	-1	-1
490	CHEMBL558419	2.01553	9	0	0	1.33671	0.0208992	0.113264	1.90848	3.50464	3.07518	0.387914	0.711345	0.90105	148.299	0.0728931	Inactive	-1	-1	-1
491	CHEMBL381397	2.09396	18	1	0	0	0.021906	-0.113261	1.55709	3.84695	3.47208	0.820168	0.989977	1.08521	141.717	0	Inactive	-1	-1	-1
492	CHEMBL556582	2.16078	11	0	0	3.92564	0.03538	-0.0856432	1.27528	3.7679	3.37915	0.952864	0.947997	0.80714	150.359	0.0790569	Inactive	-1	-1	-1
493	CHEMBL3787518	1.88706	13	2	0.08696	0	0.0209702	-0.215941	1.39108	3.47716	3.20315	0.628706	0.697831	1.05791	151.821	0	Inactive	-1	-1	-1
494	CHEMBL144686	1.88726	5	0	0	0	0.0191214	-0.151009	1.12268	3.30144	3.03881	0.625952	0.960609	1.0303	147.166	0	Inactive	-1	-1	-1
495	CHEMBL452249	1.91481	6	2	0	0.885515	0.0204143	-0.0253717	1.33744	3.45018	3.26534	0.605993	0.941583	0.94877	150.841	0	Inactive	-1	-1	-1
496	CHEMBL54629	1.71312	0	0	0	0	0.049811	-0.0669879	0.983883	3.72013	3.62291	0.979707	1.44279	0.74622	161.248	0	Inactive	-1	-1	-1
497	CHEMBL1651049	1.96639	15	4	0.07143	0	0.0239902	-0.204515	1.25135	3.60139	3.41811	0.935477	0.800216	1.0784	152.981	0	Inactive	-1	-1	-1
498	CHEMBL2314408	2.15179	1	0	0	18.396	0.0435327	-0.109068	0.998973	3.74458	3.50185	0.837322	0.989935	0.35166	150.088	0.598431	Inactive	-1	-1	-1
499	CHEMBL231007	1.98975	11	5	0.06	0	0.018542	-0.214434	1.19486	3.40378	3.24499	0.754327	0.479331	1.06964	158.092	0	Inactive	-1	-1	-1
500	CHEMBL46524	2.03436	8	0	0.01316	3.09049	0.0243129	0.0214102	1.14052	3.81389	3.59484	0.741032	0.940029	1.12736	154.378	0.0684368	Inactive	-1	-1	-1
501	CHEMBL463903	1.96342	10	0	0	3.68825	0.0282045	0.0322734	1.2141	3.84018	3.57297	0.795859	1.01708	1.04246	154.485	0.0299704	Inactive	-1	-1	-1
502	CHEMBL449062	1.7654	2	3	0	2.40072	0.032826	-0.0343402	1.0659	3.71647	3.64039	0.93972	1.15356	0.63124	157.938	0	Inactive	-1	-1	-1
503	CHEMBL1668532	1.78269	4	0	0	0	0.0270684	-0.251799	0.672642	3.35358	2.90802	0.767111	1.09937	0.66666	158.146	0	Inactive	-1	-1	-1
504	CHEMBL1829959	1.96215	13	0	0.04348	0	0.0358867	-0.253906	1.5359	3.54903	3.16349	1.16363	1.15114	0.92958	141.267	0	Inactive	-1	-1	-1
505	CHEMBL242839	1.9816	7	0	0.05882	0	0.0134688	0.0403438	1.50209	3.53507	2.8303	0.707992	0.829236	1.01932	156.072	0	Inactive	-1	-1	-1
506	CHEMBL1673067	1.84211	6	2	0.02381	0.757326	0.0200424	-0.0268128	1.42534	3.46669	3.2786	0.559947	1.07934	1.02695	154.502	0	Inactive	-1	-1	-1
507	CHEMBL188061	2.11737	5	2	0	9.95167	0.0342983	-0.0931992	1.01363	3.70748	3.54297	0.775922	0.946628	0.67974	150.562	0.289594	Inactive	-1	-1	-1
508	CHEMBL258741	1.94973	17	1	0.03571	0	0.0217011	-0.0309111	1.4819	3.79816	3.61569	0.689851	0.961525	1.11451	151.888	0	Inactive	-1	-1	-1
509	CHEMBL1689606	2.08021	9	2	0.03704	3.43578	0.0221992	-0.000265	1.21671	3.64398	3.42891	0.69604	0.898705	0.94494	150.484	0	Inactive	-1	-1	-1
510	CHEMBL536970	2.04935	13	1	0.02	1.70369	0.0214647	0.00904037	1.96311	3.51724	3.40589	0.412309	0.780487	1.01653	145.533	0.0728931	Inactive	-1	-1	-1
511	CHEMBL1770931	1.89212	7	1	0.05172	0.643177	0.0284908	0.181681	1.57437	3.66445	3.51842	0.83381	1.00439	0.96984	154.484	0.0645497	Inactive	-1	-1	-1
512	CHEMBL224543	1.92592	9	1	0.02273	1.56611	0.0238283	0.0955049	1.16737	3.58705	3.46967	0.781746	1.02411	0.76393	153.85	0.0833333	Inactive	-1	-1	-1
513	CHEMBL3338912	2.16331	19	4	0	0	0.0296339	-0.0420844	1.31744	3.86848	3.84	1.06326	1.04714	1.11564	148.595	0.00901547	Inactive	-1	-1	-1
514	CHEMBL1807633	1.57462	1	1	0	0	0.0219387	-0.0496518	1.12191	3.49375	3.19277	1.06879	1.3762	0.81718	166.709	0	Inactive	-1	-1	-1
515	CHEMBL1834886	2.09679	8	1	0.05769	0	0.0227381	-0.220076	1.45627	3.76353	3.52213	0.847899	0.897757	1.14212	150.915	0.0169997	Inactive	-1	1	-1
516	CHEMBL3218341	1.87324	5	0	0.02174	1.37001	0.0233946	0.146346	0.942176	3.44656	3.41083	0.578548	1.06571	1.09887	165.935	0.00449958	Inactive	-1	-1	-1
517	CHEMBL67126	1.81701	6	2	0.09375	0	0.0237924	-0.178753	1.12199	3.23194	3.132	0.939262	0.817617	0.77801	163.355	0	Inactive	-1	-1	-1
518	CHEMBL3326159	1.95231	7	2	0.03704	3.15976	0.026198	0.0629571	1.25451	3.63846	3.5034	0.794712	1.1037	0.73386	153.045	0	Inactive	-1	-1	-1
519	CHEMBL1950986	2.00406	6	3	0	3.51498	0.0263711	-0.21133	1.10429	3.41364	3.149	0.896519	0.811639	0.64649	151.599	0.0429923	Inactive	-1	-1	-1
520	CHEMBL455629	1.76871	0	1	0.02381	0.569716	0.0439518	0.212182	1.39275	3.61716	3.27218	1.09012	1.27394	0.67425	158.067	0	Inactive	-1	-1	-1
521	CHEMBL1796429	1.89055	9	4	0	0	0.0210723	-0.0905984	1.29327	3.43253	3.14839	0.960111	1.06124	0.81714	150.019	0	Inactive	-1	-1	-1
522	CHEMBL481680	2.08181	13	0	0.08621	0	0.0237883	-0.0763008	1.79741	3.68928	3.52918	0.717802	0.909213	1.39505	149.772	0.00849986	Inactive	-1	-1	-1
523	CHEMBL1796547	1.90512	8	5	0	0	0.022967	-0.0851104	1.41048	3.77624	3.45806	0.958102	1.04714	0.90583	152.856	0	Inactive	-1	-1	-1
524	CHEMBL3785906	2.10985	4	3	0	10.9234	0.0363875	-0.0961944	0.998997	3.85129	3.63421	0.802818	0.981072	0.55184	151.268	0.304094	Inactive	-1	-1	-1
525	CHEMBL2261388	2.0534	8	0	0.025	1.17598	0.0208873	0.0781831	1.51997	3.51219	3.29067	0.548399	0.82756	0.93137	153.451	0.0288675	Inactive	-1	-1	-1
526	CHEMBL415017	2.0551	17	3	0.06897	0	0.0269103	-0.277852	1.31666	3.74838	3.4347	0.613881	0.650001	1.08086	149.477	0	Inactive	-1	-1	-1
527	CHEMBL1214667	2.06513	23	2	0.0625	0	0.023598	-0.143156	1.4572	3.89259	3.79165	0.645108	0.791639	1.23136	148.908	0	Inactive	-1	-1	-1
528	CHEMBL1939731	2.12823	3	3	0	4.47328	0.0262438	-0.16688	1.10299	3.57146	3.51919	0.637772	0.921136	0.95803	152.605	0.404457	Inactive	-1	-1	-1
529	CHEMBL3828030	1.88887	12	0	0.15	0	0.0288808	-0.0886766	1.6769	3.43146	2.92857	0.599016	0.718165	0.97357	147.888	0	Inactive	-1	-1	-1
530	CHEMBL1078077	2.08316	14	0	0	0	0.0208333	0.016529	1.34921	3.63354	3.23701	0.877187	1.0199	0.90567	148.774	0	Inactive	-1	-1	-1
531	CHEMBL485479	1.95657	11	3	0.01316	0	0.0314008	0.108071	1.21472	3.85997	3.70217	0.894746	1.00773	1.00759	155.298	0.0190063	Inactive	-1	-1	-1
532	CHEMBL564236	2.03183	17	2	0	7.05144	0.0265177	0.132696	1.35333	3.78211	3.75364	0.862225	1.0774	1.16236	151.828	0.03125	Inactive	-1	-1	-1
533	CHEMBL1939609	1.92198	12	2	0.02083	1.66386	0.0188424	-0.0520051	1.44823	3.53881	3.26404	0.587875	0.849822	1.10511	156.689	0.00449958	Inactive	-1	-1	-1
534	CHEMBL428650	1.92286	22	2	0.05882	0	0.0242502	-0.132214	1.39543	3.87391	3.65866	0.854478	0.946777	1.25382	147.144	0	Inactive	-1	-1	-1
535	CHEMBL258340	1.92057	14	4	0.03571	0	0.0233736	-0.0830702	1.42921	3.85177	3.46985	0.866693	1.04113	0.94843	150.979	0	Inactive	-1	-1	-1
536	CHEMBL441861	2.08265	22	2	0.07143	0	0.0244098	-0.060077	1.3914	3.75478	3.74151	0.700451	0.821024	1.11154	151.016	0	Inactive	-1	-1	-1
537	CHEMBL487602	1.74439	0	0	0	1.23676	0.0444862	0.0914551	1.03447	3.58911	3.3482	0.936165	1.23677	0.55539	159.856	0.0456435	Inactive	-1	-1	-1
538	CHEMBL1098695	1.94465	16	0	0.02632	1.89097	0.0276812	0.136264	1.42034	3.82656	3.70067	0.870309	0.928761	1.1603	154.654	0.051031	Inactive	-1	-1	-1
539	CHEMBL3115706	1.87298	6	1	0	0.967266	0.0274368	0.196785	1.27192	3.78918	3.62224	0.948314	1.21005	0.99582	157.521	0	Inactive	-1	-1	-1
540	CHEMBL142952	2.05189	10	0	0.0303	6.25279	0.0395552	-0.0876086	1.28874	3.82068	3.65448	0.718507	0.930269	0.8151	152.152	0.0395285	Inactive	-1	-1	-1
541	CHEMBL1652416	1.96242	8	4	0	3.15671	0.0233239	0.0387647	1.07684	3.61102	3.49156	0.761796	0.880085	0.73557	152.367	0.166667	Inactive	-1	-1	-1
542	CHEMBL395634	1.82415	12	0	0.05172	0	0.0426312	-0.0251543	1.4467	3.87372	3.48924	1.22131	1.33595	0.93829	152.508	0	Inactive	-1	-1	-1
543	CHEMBL2314401	1.90468	7	2	0	1.29394	0.0305622	0.106364	1.23807	3.64051	3.42504	0.839096	1.09284	0.80918	156.213	0	Inactive	-1	-1	-1
544	CHEMBL3343694	1.83048	1	1	0	0.391487	0.027997	0.226795	1.11355	3.6573	3.50359	0.93649	1.29102	0.83521	160.214	0	Inactive	-1	-1	-1
545	CHEMBL3785437	1.85851	5	0	0.08333	0	0.0233426	-0.0504825	1.87719	3.3721	2.98417	0.566711	0.621335	0.94626	153.842	0	Inactive	-1	-1	-1
546	CHEMBL1944819	1.85878	6	0	0.07143	0	0.0346855	-0.177774	1.2859	3.18232	2.86248	1.18156	1.13602	0.63623	156.965	0	Inactive	-1	-1	-1
547	CHEMBL463201	2.01326	14	2	0	0	0.0244919	-0.00810119	1.3854	3.84059	3.68613	0.908391	0.924888	1.24712	153.325	0	Inactive	-1	-1	-1
548	CHEMBL1807204	2.1223	6	1	0	15.1518	0.0388652	-0.141983	1.06562	3.82179	3.4698	0.811458	1.02602	0.75157	148.41	0.392166	Inactive	-1	-1	-1
549	CHEMBL592304	2.10596	11	3	0.02174	0	0.0194134	-0.232901	1.27363	3.57117	3.18948	0.796819	0.70521	1.01239	152.697	0	Inactive	-1	-1	-1
550	CHEMBL1097153	2.05091	13	1	0	0	0.0276745	-0.0319621	1.34372	3.82812	3.56458	0.993699	1.00758	0.97701	150.897	0	Inactive	-1	-1	-1
551	CHEMBL1950414	2.05124	15	0	0.03704	0	0.0254847	-0.0592996	1.80878	3.85834	3.39819	0.634288	0.831531	1.11389	142.896	0	Inactive	-1	-1	-1
552	CHEMBL337812	1.8329	5	2	0.025	1.4855	0.0244895	0.061248	1.25984	3.45321	3.29656	0.709305	0.937922	0.86915	167.086	0.00389675	Inactive	-1	-1	-1
553	CHEMBL2381929	2.01816	9	0	0	0	0.0229488	-0.128966	1.0355	3.30162	3.02652	0.848676	0.834464	0.84832	151.477	0	Inactive	-1	-1	-1
554	CHEMBL203692	1.96548	15	1	0.01724	0	0.0220399	-0.142641	1.28757	3.74045	3.50563	0.79453	0.92836	1.091	151.182	0	Inactive	-1	-1	-1
555	CHEMBL323909	2.11568	3	0	0	10.8776	0.0440157	-0.10376	0.998889	3.73055	3.54667	0.885921	1.00897	0.38375	150.903	0.57759	Inactive	-1	-1	-1
556	CHEMBL3637876	1.98559	11	1	0.04348	1.36267	0.0220821	-0.0364028	1.72172	3.51631	3.17649	0.42377	0.674003	0.96731	152.163	0.0728931	Inactive	-1	-1	-1
557	CHEMBL1774617	1.88983	11	1	0.025	0	0.033628	0.00779069	1.48549	3.67345	3.07407	1.0398	1.18976	0.79649	149.323	0	Inactive	-1	-1	-1
558	CHEMBL22	2.1955	10	6	0.07143	0	0.0203719	-0.0726068	1.49117	3.71093	3.68814	0.797901	0.704755	1.27395	152.88	0	Inactive	-1	-1	-1
559	CHEMBL119890	1.78652	2	0	0	0	0.0533105	-0.0941121	1.61316	3.06556	2.76414	0.799653	0.834445	0.56327	153.842	0	Inactive	-1	-1	-1
560	CHEMBL2087274	1.96125	21	0	0.02564	0	0.0258956	-0.0212176	1.40325	3.89996	3.78951	0.836623	1.02837	1.21197	147.325	0	Inactive	-1	-1	-1
561	CHEMBL1761207	1.8343	6	1	0.04348	1.15627	0.0327332	-0.138924	1.61659	3.43779	3.31419	0.631925	0.857887	0.89615	158.776	0.00389675	Inactive	-1	-1	-1
562	CHEMBL3338935	1.99595	6	0	0.06667	0	0.0215708	-0.313346	0.923384	3.18668	3.04736	0.68181	0.940445	0.90052	154.6	0	Inactive	-1	-1	-1
563	CHEMBL2337382	1.96662	11	1	0.04545	1.36267	0.0217938	0.0989275	2.25208	3.51367	3.14293	0.424691	0.726562	0.95365	147.599	0.0728931	Inactive	-1	-1	-1
564	CHEMBL2338059	2.13684	1	1	0	8.32193	0.0405587	-0.112813	1.00985	3.71567	3.56773	0.840382	1.06216	0.54591	151.472	0.493202	Inactive	-1	-1	-1
565	CHEMBL218284	1.97312	12	1	0.02703	2.61577	0.0283611	-0.115584	1.13003	3.86795	3.60863	0.868942	0.999954	0.99147	156.327	0.0707107	Inactive	-1	-1	-1
566	CHEMBL138618	1.91368	7	0	0	0	0.0324287	-0.00187189	1.30711	3.4856	3.14097	1.18306	1.26337	0.74619	145.913	0	Inactive	-1	-1	-1
567	CHEMBL378488	2.06142	15	0	0.02	0	0.0308116	-0.168661	1.6104	3.56698	3.40063	0.991683	1.0494	1.03032	139.638	0	Inactive	-1	-1	-1
568	CHEMBL1169874	2.15012	5	1	0	11.3794	0.0354313	-0.130174	1.01536	3.75287	3.54504	0.777232	0.907537	0.67441	149.459	0.296216	Inactive	-1	-1	-1
569	CHEMBL475290	1.89312	10	0	0.04762	0	0.0311196	-0.113813	1.95007	3.64693	3.24737	0.641851	0.92978	0.96786	146.638	0	Inactive	-1	-1	-1
570	CHEMBL1807206	1.96913	11	3	0	1.20234	0.0233472	0.0793537	1.3188	3.83522	3.6671	0.759085	0.976858	1.0715	152.999	0	Inactive	-1	-1	-1
571	CHEMBL386160	1.97975	19	0	0.01786	0	0.0267389	-0.129846	1.5706	3.84043	3.51494	0.751366	0.95378	1.08251	142.108	0	Inactive	-1	-1	-1
572	CHEMBL566739	1.79973	5	3	0.03125	2.20456	0.0475477	0.0965544	1.27394	3.7224	3.62999	0.857855	0.933664	0.81691	154.497	0.25	Inactive	-1	-1	-1
573	CHEMBL1162153	1.75817	5	2	0	0	0.0410239	0.0627659	1.04703	3.60358	3.2235	1.2171	1.18446	0.5636	156.774	0	Inactive	-1	-1	-1
574	CHEMBL3785554	1.57761	1	0	0.09091	0	0.0125201	-0.53233	0.650941	2.96711	2.5054	0.452365	1.04492	0.85909	170.805	0	Inactive	-1	-1	-1
575	CHEMBL557483	1.77572	1	0	0.02632	0	0.0372496	-0.142633	1.42007	3.63146	3.21669	0.815579	0.93201	0.78664	155.808	0	Inactive	-1	-1	-1
576	CHEMBL374975	2.10537	3	0	0	12.2141	0.0413001	-0.161337	1.0004	3.74307	3.54436	0.847704	1.00006	0.48276	150.445	0.553259	Inactive	-1	-1	-1
577	CHEMBL3338923	1.93159	5	0	0.02778	1.76976	0.0292758	-0.0609564	1.1851	3.28719	3.02552	0.914515	1.30258	1.01231	151.007	0.140287	Inactive	-1	-1	-1
578	CHEMBL1689611	2.08509	8	2	0.04545	1.85054	0.0202468	-0.0280003	1.20303	3.45394	3.26815	0.608011	0.818312	0.99301	149.524	0	Inactive	-1	-1	-1
579	CHEMBL537778	1.86687	4	1	0.02381	0	0.0371825	0.0827526	1.62692	3.72134	3.2766	0.856679	0.969927	0.73858	154.312	0	Inactive	-1	-1	-1
580	CHEMBL385167	1.88933	10	1	0.02	0	0.0403799	-0.00209312	1.38788	3.69701	3.60697	0.817674	0.94954	0.69878	148.487	0	Inactive	-1	-1	-1
581	CHEMBL2028043	1.8345	6	1	0.05	0	0.0323728	-0.0960131	1.59059	3.43555	3.14353	0.902149	1.07507	0.83502	152.695	0	Inactive	-1	-1	-1
582	CHEMBL1950426	2.03172	15	2	0.04545	0	0.0238558	-0.245085	1.27553	3.52048	3.23272	0.913119	0.819652	0.97796	150.006	0	Inactive	-1	-1	-1
583	CHEMBL423346	1.88131	6	0	0.06667	0	0.0285675	-0.18967	0.862243	3.43942	3.1556	0.921156	1.09274	0.72735	161.096	0	Inactive	-1	-1	-1
584	CHEMBL454151	2.07531	8	0	0	0	0.0274225	0.0439711	1.34432	3.88579	3.64366	1.02869	0.821074	0.98544	153.664	0	Inactive	-1	1	-1
585	CHEMBL3581810	2.05118	8	0	0.01563	2.26533	0.0233443	-0.0600898	1.09469	3.61376	3.44569	0.608612	0.92764	1.17106	150.886	0.0684368	Inactive	-1	-1	-1
586	CHEMBL1673060	1.9177	6	3	0.1087	0	0.024723	-0.236076	1.10676	3.36369	3.24087	0.776895	0.750689	0.96872	160.564	0	Inactive	-1	-1	-1
587	CHEMBL1171802	2.07827	9	3	0.05172	3.04925	0.0209221	0.0321165	1.20938	3.64674	3.4752	0.700101	0.835853	1.00384	152.363	0	Inactive	-1	-1	-1
588	CHEMBL3408752	1.92226	3	0	0	0	0.0512584	0.121023	1.42107	3.50403	3.09589	0.785699	1.07952	0.58522	155.402	0	Inactive	-1	-1	-1
589	CHEMBL3402044	1.93733	11	0	0.04167	3.89746	0.0242794	-0.145479	1.40702	3.70968	3.61114	0.706818	0.918951	1.00227	151.561	0.0335911	Inactive	-1	-1	-1
590	CHEMBL1807205	1.88181	5	1	0.01923	1.04867	0.046756	0.199557	1.47726	3.70515	3.55227	1.06782	1.2172	0.82353	153.794	0	Inactive	-1	-1	-1
591	CHEMBL482470	1.91763	10	4	0.04839	0	0.0334295	-0.18554	1.06645	3.73421	3.49595	0.986518	0.905606	0.84877	158.28	0	Inactive	-1	-1	-1
592	CHEMBL595024	1.87951	7	0	0	1.04397	0.0224353	0.178237	1.40637	3.4279	3.03835	0.644059	0.884835	0.80936	150.257	0.0589256	Inactive	-1	-1	-1
593	CHEMBL487721	1.8763	6	0	0	0	0.0274576	-0.0355058	0.534768	3.18646	2.5719	0.571912	0.70319	0.89056	149.923	0	Inactive	-1	-1	-1
594	CHEMBL383681	1.79448	5	1	0	0	0.0421736	0.0296551	0.956408	3.52419	3.12926	1.22394	1.07919	0.59306	160.055	0	Inactive	-1	-1	-1
595	CHEMBL486391	1.9465	7	1	0.02941	2.11319	0.0324156	-0.0872494	1.11651	3.67252	3.44917	1.08311	1.15442	0.83184	158.068	0.0642229	Inactive	-1	-1	-1
596	CHEMBL1939608	1.92755	11	0	0.02778	0	0.0224716	-0.0680606	1.45988	3.42939	3.03	0.790262	1.03302	0.94541	143.412	0	Inactive	-1	-1	-1
597	CHEMBL2374218	2.01061	8	6	0	0	0.0230271	-0.0123226	1.27967	3.8444	3.51235	0.793019	0.72856	1.17285	154.134	0	Inactive	-1	-1	-1
598	CHEMBL1215382	2.05592	3	1	0	2.37841	0.0311049	-0.183119	1.07475	3.51234	3.24624	0.710012	0.94299	0.74942	151.715	0.0416667	Inactive	-1	-1	-1
599	CHEMBL242732	1.91559	5	1	0	1.53653	0.0245146	0.0832014	1.71898	3.50503	3.08833	0.443152	0.610261	0.76214	157.95	0.0728931	Inactive	-1	-1	-1
600	CHEMBL232479	2.14623	14	1	0	2.30649	0.0234554	-0.00943121	1.41862	3.76987	3.42041	0.795865	1.00491	0.90043	147.724	0.0589256	Inactive	-1	-1	-1
601	CHEMBL118066	1.98649	7	3	0	0	0.0239906	-0.0589247	1.22889	3.49932	3.26683	0.845758	0.764314	0.84233	152.77	0	Inactive	-1	-1	-1
602	CHEMBL211683	1.88913	10	1	0.01852	0	0.031401	0.0502204	1.29173	3.84523	3.6291	0.942767	1.17499	0.88721	149.905	0.00658396	Inactive	-1	-1	-1
603	CHEMBL1075701	2.04045	12	1	0.08929	0	0.020221	-0.0582353	1.38822	3.60537	3.43231	0.587614	1.11114	1.31446	151.951	0	Inactive	-1	-1	-1
604	CHEMBL563578	1.94555	12	0	0.01724	4.53975	0.0328999	-0.160718	1.10201	3.79472	3.56776	0.912027	1.04132	0.88546	155.223	0.0311751	Inactive	-1	-1	-1
605	CHEMBL1088963	2.01738	16	3	0.05769	0	0.022631	-0.214005	1.22843	3.58159	3.32032	0.853231	0.754295	1.093	152.255	0	Inactive	-1	-1	-1
606	CHEMBL517229	2.03044	12	0	0	0	0.0247489	-0.136666	1.18904	3.50567	3.29367	0.843944	0.888216	0.86411	149.732	0	Inactive	-1	1	-1
607	CHEMBL453715	1.85691	9	1	0.04	1.29733	0.0313254	-0.192031	1.22207	3.57529	3.40307	0.849012	1.1078	0.97756	159.897	0	Inactive	-1	-1	-1
608	CHEMBL1213750	1.92989	8	1	0.05	0	0.0178167	-0.154564	1.31713	3.32274	3.18401	0.524171	0.734984	1.01997	149.715	0	Inactive	-1	-1	-1
609	CHEMBL595127	2.00606	16	4	0.06944	0	0.0201018	-0.110341	1.24599	3.77701	3.55049	0.750462	0.748114	1.28684	150.155	0	Inactive	-1	-1	-1
610	CHEMBL203757	2.0153	9	2	0	0	0.0252031	-0.0838857	1.39111	3.85409	3.58303	0.81295	0.726005	1.12337	155.799	0.0380125	Inactive	-1	-1	-1
611	CHEMBL3343688	1.88575	10	1	0.05769	1.41474	0.0275272	-0.16764	1.0912	3.60422	3.34353	0.636143	0.850354	1.0229	161.027	0.00449958	Inactive	-1	-1	-1
612	CHEMBL374107	1.98524	7	0	0.05556	0	0.0265676	-0.00731887	1.56323	3.46241	3.19898	0.625484	0.829142	0.85373	154.82	0	Inactive	-1	-1	-1
613	CHEMBL1517	1.86051	5	0	0	0	0.0455381	0.129161	1.05465	3.32424	2.85959	1.03914	0.977413	0.59257	158.495	0	Inactive	-1	-1	-1
614	CHEMBL584	1.95771	21	0	0.02632	0	0.0249393	-0.00646126	1.4833	3.89945	3.78889	0.848684	1.04672	1.27775	145.784	0	Inactive	-1	-1	-1
615	CHEMBL41631	1.9032	15	4	0	0	0.029807	-0.0580962	1.2472	3.88483	3.74462	0.999969	0.931952	0.9867	155.748	0	Inactive	-1	-1	-1
616	CHEMBL136422	1.94024	13	2	0.06522	0	0.0248692	-0.187989	1.15561	3.52695	3.29567	0.886163	0.687394	1.00425	156.252	0	Inactive	-1	-1	-1
617	CHEMBL3752878	2.091	13	0	0	0	0.0307235	0.00583129	1.28578	3.60978	3.12511	0.826087	0.936238	0.9654	144.514	0.0232221	Inactive	-1	-1	-1
618	CHEMBL2437276	1.99767	11	0	0.01471	0	0.0308551	-0.133741	1.18201	3.83111	3.60504	0.925308	1.00132	0.83459	150.832	0	Inactive	-1	1	-1
619	CHEMBL3104741	2.06845	11	1	0.02273	1.53653	0.0222896	-0.0277977	1.82052	3.51147	3.23866	0.410818	0.619732	0.94517	149.799	0.0728931	Inactive	-1	-1	-1
620	CHEMBL225606	2.00778	23	2	0.075	0	0.0188808	-0.0163177	1.56339	3.83897	3.82107	0.67374	1.0888	1.44569	142.343	0	Inactive	-1	-1	-1
621	CHEMBL2087259	1.63331	1	2	0	0	0.0182456	-0.00985422	1.08655	3.42937	3.16616	0.90646	0.983517	0.86975	164.08	0	Inactive	-1	-1	-1
622	CHEMBL2207693	1.9937	19	3	0.06944	0	0.0249257	-0.201856	1.3593	3.8817	3.63279	0.771745	0.795531	1.26621	152.909	0.00849986	Inactive	-1	-1	-1
623	CHEMBL2437275	1.90323	17	0	0.02439	0	0.0340759	-0.0344716	1.20074	3.84783	3.76924	0.79158	0.884783	0.93982	154.929	0	Inactive	-1	-1	-1
624	CHEMBL521539	2.12619	2	1	0	11.9849	0.0444574	-0.120729	1.01467	3.73124	3.55284	0.957465	1.00109	0.35698	152.153	0.558634	Inactive	-1	-1	-1
625	CHEMBL1923937	2.00369	11	0	0.04839	1.52312	0.0229538	0.0145982	1.1769	3.7557	3.44951	0.707128	1.06726	1.08649	147.851	0	Inactive	-1	-1	-1
626	CHEMBL3353665	1.98844	9	0	0.01923	0	0.0315094	0.116045	1.40373	3.79547	3.66068	0.847569	0.837615	0.92314	155.921	0	Inactive	-1	1	-1
627	CHEMBL271442	1.96331	19	3	0.05	0	0.0249998	-0.211752	1.33067	3.83373	3.4783	0.930721	0.816975	1.10935	149.582	0	Inactive	-1	-1	-1
628	CHEMBL3601694	2.10497	11	4	0.01667	1.05987	0.0184935	0.119714	1.34852	3.69268	3.55581	0.696921	0.787992	1.08098	155.352	0	Inactive	-1	-1	-1
629	CHEMBL276915	1.91602	12	1	0	3.97628	0.0325435	-0.0747989	1.24501	3.86004	3.65637	0.926106	1.17287	1.01566	151.764	0.0127578	Inactive	-1	-1	-1
630	CHEMBL369675	2.02067	5	1	0	0	0.030543	-0.07184	1.04718	3.59554	3.47198	0.769355	0.998326	0.78696	153.512	0	Inactive	-1	-1	-1
631	CHEMBL3828372	1.97273	13	1	0.03571	0	0.0213108	-0.112232	1.33749	3.83257	3.37807	0.790222	0.944113	1.10045	153.195	0	Inactive	-1	-1	-1
632	CHEMBL1928401	1.85483	6	0	0	0	0.0292368	-0.023698	1.72484	3.34402	2.88079	0.521992	0.717153	0.85895	143.459	0	Inactive	-1	-1	-1
633	CHEMBL457429	1.74742	0	0	0.03846	0	0.0322914	-0.0440026	1.28097	3.33484	2.55353	0.737328	1.07503	0.86123	161.846	0.0161274	Inactive	-1	-1	-1
634	CHEMBL396750	2.01052	18	0	0.03226	0	0.029305	-0.0392992	1.71693	3.83909	3.53921	0.879959	1.04327	1.26394	141.007	0	Inactive	-1	-1	-1
635	CHEMBL218330	2.11405	9	1	0.02381	0	0.0205349	0.086078	1.21159	3.56742	3.4636	0.670432	1.00988	0.8943	151.706	0	Inactive	-1	-1	-1
636	CHEMBL140028	1.94319	5	2	0.02381	1.7065	0.0282865	-0.0178511	1.34379	3.57091	3.30757	0.773335	0.996125	0.80565	164.512	0.00449958	Inactive	-1	-1	-1
637	CHEMBL219345	1.96639	20	2	0.0303	0	0.0274282	-0.16244	1.29667	3.86999	3.61766	0.970824	0.971297	1.14727	149.656	0	Inactive	-1	-1	-1
638	CHEMBL31970	2.16556	10	1	0	4.28816	0.0364948	-0.0987709	1.24043	3.77118	3.65396	0.999533	0.968747	0.81587	154.654	0.0790569	Inactive	-1	-1	-1
639	CHEMBL1947240	1.85143	10	3	0.07692	0	0.029561	-0.219486	1.258	3.51491	3.27743	0.954442	0.927894	1.02829	161.543	0	Inactive	-1	-1	-1
640	CHEMBL45171	1.81722	4	0	0	2.87354	0.0266022	0.0256346	1.13897	3.62198	3.3691	0.710802	1.04539	0.91357	162.792	0.0501431	Inactive	-1	-1	-1
641	CHEMBL251663	1.86564	5	0	0	0	0.0621305	-0.285495	1.62032	3.25082	2.78424	0.805757	0.885894	0.51892	150.515	0	Inactive	-1	-1	-1
642	CHEMBL1487	1.93451	9	1	0	0	0.0341103	0.0463344	1.24046	3.6777	3.48673	1.08479	1.05625	0.75262	153.646	0	Inactive	-1	-1	-1
643	CHEMBL1214108	1.92752	17	1	0.01429	0	0.0312621	0.103492	1.36245	3.84443	3.67709	1.02152	1.21293	0.90182	153.04	0	Inactive	-1	-1	-1
644	CHEMBL521919	1.8996	9	0	0.01923	0	0.0316527	-0.179511	1.30673	3.73232	3.38667	0.579609	0.775683	0.94175	157.158	0	Inactive	-1	1	-1
645	CHEMBL244888	2.0346	16	0	0	6.69386	0.0280814	0.00924812	1.37482	3.78211	3.75364	0.979293	1.06054	1.11616	150.502	0.03125	Inactive	-1	-1	-1
646	CHEMBL2071293	1.91415	5	2	0.0625	0	0.0256616	-0.249429	1.0167	3.18445	3.1308	1.04851	1.23033	0.87816	157.978	0.00913328	Inactive	-1	-1	-1
647	CHEMBL219618	1.98769	12	0	0.02381	1.95522	0.0334577	0.0152011	1.29264	3.59603	3.32329	0.558706	0.739894	0.82383	146.391	0.0833333	Inactive	-1	-1	-1
648	CHEMBL1796424	1.86196	5	0	0.02381	0	0.033605	-0.119821	1.582	3.73056	3.1604	0.949082	1.12207	0.73021	151.577	0	Inactive	-1	-1	-1
649	CHEMBL147867	1.92349	13	3	0.06818	0	0.0242558	-0.307481	1.17975	3.46475	3.20868	0.904684	0.75272	0.99637	153.081	0	Inactive	-1	-1	-1
650	CHEMBL2087251	2.04854	21	2	0.01136	0	0.0226735	-0.0728541	1.31705	3.8156	3.67584	0.881935	0.958964	1.34071	151.877	0	Inactive	-1	-1	-1
651	CHEMBL1078340	2.08417	9	0	0	2.58078	0.0233024	-0.186127	1.1177	3.52401	3.30244	0.595057	0.834648	0.98507	144.368	0.0476126	Inactive	-1	-1	-1
652	CHEMBL561989	2.04708	10	0	0	0	0.0219799	-0.195485	1.35226	3.71265	3.35916	0.776728	0.987156	1.08848	149.097	0	Inactive	-1	-1	-1
653	CHEMBL139805	2.04648	11	1	0.03571	0	0.0220549	-0.179007	1.37207	3.8381	3.61489	0.855457	0.878561	1.07941	153.803	0	Inactive	-1	-1	-1
654	CHEMBL2207698	2.04584	8	0	0.01563	0.474957	0.0230563	-0.0398474	1.10638	3.60837	3.467	0.649933	0.933443	1.17894	150.886	0.0239344	Inactive	-1	-1	-1
655	CHEMBL1213927	1.91981	13	5	0.09615	0	0.0229663	-0.261744	1.14434	3.47471	3.21897	0.873623	0.616099	1.08279	157.23	0	Inactive	-1	-1	-1
656	CHEMBL1215532	1.92065	9	2	0.04167	3.80909	0.0241721	-0.225621	1.21187	3.61015	3.30952	0.845089	0.789129	0.93169	154.824	0.0227062	Inactive	-1	-1	-1
657	CHEMBL578464	1.91172	0	3	0	6.32642	0.0373244	-0.0126193	1.03293	3.57914	3.21125	0.773808	1.40759	0.54259	152.501	0.0291034	Inactive	-1	-1	-1
658	CHEMBL140405	1.89295	5	2	0.05556	0	0.0345051	0.0961532	1.50582	3.45441	3.1968	0.57984	0.788002	0.66908	159.004	0	Inactive	-1	-1	-1
659	CHEMBL451713	1.91827	7	0	0.04167	0	0.0222225	-0.132114	0.829797	3.0528	2.82282	0.768719	1.06809	0.81172	148.269	0	Inactive	-1	-1	-1
660	CHEMBL23860	1.79111	5	2	0	1.17137	0.0247405	0.00581587	1.11413	3.6173	3.33832	0.862544	0.993044	0.83108	157.833	0.0456435	Inactive	-1	-1	-1
661	CHEMBL2207704	1.87499	9	2	0.06	0	0.0262056	-0.0237918	1.38871	3.64001	3.43271	0.686849	1.02567	0.98688	149.329	0	Inactive	-1	-1	-1
662	CHEMBL1796552	1.94224	7	0	0.08333	0	0.0430185	0.0705093	1.98334	3.45941	3.04499	0.545297	0.717727	0.94356	146.893	0.0073611	Inactive	-1	-1	-1
663	CHEMBL1098671	2.02177	12	1	0	0	0.0349981	0.0310437	1.28205	3.83318	3.77846	0.924587	1.00044	1.00823	156.066	0.0207149	Inactive	-1	-1	-1
664	CHEMBL55988	2.16472	8	0	0	0	0.0210431	-0.156447	1.24415	3.46191	3.31282	0.757314	0.712729	1.01962	148.033	0	Inactive	-1	-1	-1
665	CHEMBL375673	2.15924	10	1	0.04762	0	0.0187114	-0.136834	1.34081	3.49307	3.24645	0.70173	0.733934	1.08467	145.371	0	Inactive	-1	-1	-1
666	CHEMBL1214101	2.06576	21	2	0.05405	0	0.0217144	-0.146212	1.40603	3.87725	3.78999	0.714293	0.884282	1.23231	150.356	0	Inactive	-1	-1	-1
667	CHEMBL603438	1.91427	9	0	0.02174	0	0.0253823	-0.000336	1.35508	3.75277	3.30741	0.87557	0.8452	0.92389	158.33	0	Inactive	-1	-1	-1
668	CHEMBL498037	1.86733	5	0	0	0	0.0472805	-0.148163	1.02858	3.64162	3.33938	1.20591	1.04876	0.53356	162.673	0	Inactive	-1	-1	-1
669	CHEMBL1822440	1.82131	4	0	0	0	0.0311475	-0.0967011	0.981898	3.36226	3.09886	0.886396	0.859947	0.65229	164.074	0	Inactive	-1	-1	-1
670	CHEMBL3260209	1.89558	6	0	0.08333	0	0.0385131	-0.164902	1.01929	3.13567	2.77182	1.22586	1.27928	0.69541	153.189	0	Inactive	-1	-1	-1
671	CHEMBL1162156	2.03879	13	1	0.02174	0	0.0288964	-0.0127127	1.17834	3.62017	3.39647	1.07995	1.07045	0.86819	149.663	0	Inactive	-1	-1	-1
672	CHEMBL3752970	2.04931	16	2	0.02564	0	0.0307606	-0.0376128	1.36192	3.86225	3.6482	1.12802	1.0502	1.07501	152.635	0	Inactive	-1	-1	-1
673	CHEMBL563475	1.83652	4	2	0	0	0.0308753	0.0766342	1.09653	3.78758	3.64734	0.853537	1.06703	0.91575	160.302	0	Inactive	-1	-1	-1
674	CHEMBL271995	2.03418	7	3	0.07895	0	0.0181445	-0.172541	1.10138	3.29312	3.14669	0.777644	0.542777	0.97461	156.891	0	Inactive	-1	-1	-1
675	CHEMBL2368522	1.81571	0	1	0.02381	0.40548	0.0332435	0.278765	1.24917	3.64945	3.38737	0.763461	1.07461	0.7184	159.143	0	Inactive	-1	-1	-1
676	CHEMBL242802	2.03982	10	0	0.025	0	0.0475088	-0.0262747	1.64158	3.73422	3.16842	1.10862	1.13227	0.88521	144.191	0	Inactive	-1	-1	-1
677	CHEMBL1219	1.94601	10	1	0.02	3.10518	0.0203081	0.103815	2.03846	3.51605	3.33764	0.383583	0.711008	1.03362	157.689	0.0773927	Inactive	-1	-1	-1
678	CHEMBL1796550	1.99462	18	2	0.01515	0	0.023892	-0.125102	1.48688	3.88924	3.65445	0.847172	0.935795	1.18373	149.637	0.00849986	Inactive	-1	-1	-1
679	CHEMBL9441	1.84027	10	0	0.01667	1.66809	0.0208664	0.0575924	1.30363	3.76213	3.61539	0.738788	0.991215	1.12583	162.789	0.00301841	Inactive	-1	-1	-1
680	CHEMBL1667883	2.08859	19	0	0.02703	0	0.0341475	-0.121367	1.76243	4.01665	3.78919	0.876479	0.957757	1.2094	143.228	0.00849986	Inactive	-1	-1	-1
681	CHEMBL1807631	1.59033	1	1	0	0	0.0174064	-0.0037941	1.06523	3.44925	3.15152	0.826515	1.15048	0.89508	163.02	0	Inactive	-1	-1	-1
682	CHEMBL1213385	1.9385	7	0	0.02941	0	0.0185959	0.120833	1.36188	3.42812	3.00313	0.660668	0.676364	0.9223	158.771	0	Inactive	-1	-1	-1
683	CHEMBL1822433	2.03006	10	2	0.02632	0	0.0201136	-0.0419501	1.76131	3.42534	3.06194	0.550998	0.759766	0.91871	146.607	0	Inactive	-1	-1	-1
684	CHEMBL3115469	1.95965	12	1	0.05357	0	0.021108	0.0659061	1.31727	3.73139	3.52508	0.693215	1.02374	0.97085	148.375	0	Inactive	-1	1	-1
685	CHEMBL293798	1.91539	11	1	0.04	0	0.0227456	-0.0303712	1.37019	3.6864	3.44926	0.695034	0.911635	0.97607	156.434	0	Inactive	-1	-1	-1
686	CHEMBL3759841	1.84803	5	0	0	0	0.031972	0.0916127	1.18104	3.70227	2.97494	1.11151	0.930548	0.71094	161.09	0	Inactive	-1	-1	-1
687	CHEMBL118602	1.99012	11	2	0.05172	0	0.0255238	-0.07778	1.20407	3.74325	3.53328	0.724615	0.902849	1.04579	153.032	0	Inactive	-1	-1	-1
688	CHEMBL1835276	1.92082	5	2	0.02174	1.81582	0.0384868	0.00876385	1.32493	3.59899	3.30758	0.777924	1.00788	0.77333	162.089	0.00449958	Inactive	-1	-1	-1
689	CHEMBL594909	1.81734	8	0	0.04348	0	0.0354599	-0.156157	1.41494	3.57256	3.31415	0.814808	1.04705	0.87181	156.467	0	Inactive	-1	-1	-1
690	CHEMBL28	2.00723	14	1	0.03571	0	0.0196825	0.0209252	1.36584	3.77035	3.3637	0.724497	0.94506	1.21699	142.87	0	Inactive	-1	1	-1
691	CHEMBL111650	1.85191	0	3	0	0	0.0328951	0.0597844	1.0314	3.61506	2.84882	1.12433	1.40255	0.19708	153.194	0	Inactive	-1	-1	-1
692	CHEMBL54554	1.76483	5	1	0	0	0.0405163	0.113201	1.03071	3.60081	3.18402	1.26094	1.22645	0.53326	156.194	0	Inactive	-1	-1	-1
693	CHEMBL472910	1.99571	15	4	0.02703	0	0.0243265	-0.0838016	1.31593	3.88946	3.58809	0.767064	0.955454	1.03226	151.6	0	Inactive	-1	-1	-1
694	CHEMBL450678	2.1252	2	0	0	5.42619	0.0442374	-0.0734087	0.871637	3.48271	3.33562	0.927024	1.0166	0.44206	150.14	0.147856	Inactive	-1	-1	-1
695	CHEMBL1807208	1.98146	7	1	0.05556	0	0.0201134	-0.235442	1.19236	3.40889	3.14423	0.782272	0.793318	0.97902	155.139	0	Inactive	-1	1	-1
696	CHEMBL484523	2.00683	10	4	0.01563	0	0.0256363	-0.0649202	1.3793	3.84014	3.50313	0.554917	0.712671	0.97584	151.118	0	Inactive	-1	-1	-1
697	CHEMBL477855	1.82866	9	3	0.02778	0	0.0229505	-0.0579592	1.20371	3.85071	3.59948	0.823254	0.969951	1.08318	158.189	0	Inactive	-1	-1	-1
698	CHEMBL1668529	1.94633	13	3	0.04762	0	0.0197698	-0.154507	1.34127	3.45727	3.14516	0.804088	0.807059	1.00848	149.891	0	Inactive	-1	-1	-1
699	CHEMBL90496	1.91807	13	2	0.07143	0	0.022269	-0.17066	1.59794	3.43173	3.13693	0.58455	0.706964	0.99135	145.802	0	Inactive	-1	-1	-1
700	CHEMBL442487	1.92517	15	1	0	0	0.0288324	-0.12292	1.25129	3.86801	3.69021	0.958222	1.0402	1.12487	153.564	0	Inactive	-1	-1	-1
701	CHEMBL531113	1.88724	6	0	0.02941	1.1547	0.0223002	-0.19555	0.921302	3.32164	3.05407	0.520642	0.796514	0.82595	160.561	0.025	Inactive	-1	-1	-1
702	CHEMBL3104872	1.75157	0	0	0	0	0.0732896	-0.0439394	0.900334	3.43553	3.10798	0.99685	1.58585	0.48999	158.533	0	Inactive	-1	-1	-1
703	CHEMBL594331	1.9609	11	1	0	0	0.0260298	0.129615	1.22419	3.73325	3.63777	0.851243	1.14211	1.04286	154.925	0.00981479	Inactive	-1	-1	-1
704	CHEMBL518839	1.92841	13	2	0.04762	0	0.0184748	-0.0192465	1.4234	3.49221	3.05621	0.689021	0.924275	1.05916	149.184	0	Inactive	-1	-1	-1
705	CHEMBL449170	1.98712	9	1	0.04348	0	0.0190599	-0.0285104	1.30261	3.49504	3.22508	0.625919	0.889722	1.13063	145.92	0	Inactive	-1	-1	-1
706	CHEMBL2089262	2.1119	2	2	0.01667	5.66975	0.028621	-0.169608	1.04503	3.53099	3.46852	0.648775	0.936229	0.8809	152.112	0.409676	Inactive	-1	-1	-1
707	CHEMBL607860	1.93697	13	3	0.08	0	0.0241271	-0.164607	1.14828	3.53205	3.30269	0.871639	0.625287	1.04834	158.027	0	Inactive	-1	-1	-1
708	CHEMBL1796549	1.91947	13	6	0.10714	0	0.0222845	-0.253562	1.14347	3.48237	3.2485	0.862327	0.563312	1.11838	158.804	0	Inactive	-1	-1	-1
709	CHEMBL1323	2.08134	17	0	0.03333	0	0.0243517	-0.145319	1.40509	3.8653	3.46116	0.873144	1.02068	1.13995	146.062	0	Inactive	-1	-1	-1
710	CHEMBL550720	1.96587	4	0	0.025	0	0.0353115	-0.0464821	1.07524	3.55067	3.38645	0.9448	1.13059	0.50901	153.1	0	Inactive	-1	-1	-1
711	CHEMBL1254762	1.93328	11	1	0.06818	0	0.023492	-0.0510554	1.38174	3.77062	3.149	0.818509	1.08874	1.00512	150.773	0	Inactive	-1	-1	-1
712	CHEMBL394241	1.94574	14	0	0	0	0.0295628	0.0313575	1.25709	3.87978	3.72231	0.939411	1.18841	1.19502	153.104	0	Inactive	-1	-1	-1
713	CHEMBL230958	1.94379	14	0	0	0	0.0250493	-0.160252	1.13652	3.70069	3.42296	0.862254	0.954185	0.99824	151.659	0	Inactive	-1	-1	-1
714	CHEMBL255062	2.03274	11	4	0.01613	3.93444	0.027049	-0.152258	1.31767	3.77727	3.4752	0.563418	0.683322	0.90571	151.504	0.0429923	Inactive	-1	-1	-1
715	CHEMBL1780019	1.99602	14	2	0	0	0.0219266	-0.132388	1.41157	3.8948	3.68511	0.839593	0.896421	1.17477	151.449	0	Inactive	-1	-1	-1
716	CHEMBL570314	2.0007	14	3	0.0625	0	0.0194912	-0.0983902	1.26848	3.77193	3.405	0.723895	0.772724	1.26121	148.392	0	Inactive	-1	-1	-1
717	CHEMBL418246	2.11121	12	1	0.05769	1.60913	0.0213332	-0.084551	1.36037	3.62888	3.28556	0.585358	0.85771	1.25084	158.208	0.00449958	Inactive	-1	-1	-1
718	CHEMBL3338911	2.1115	0	0	0	11.1207	0.0496954	-0.12845	0.84714	3.46619	3.31788	0.896462	1.04122	0.30615	148.789	0.174136	Inactive	-1	-1	-1
719	CHEMBL272089	1.98039	16	2	0.01852	0	0.0286459	-0.0365449	1.38312	3.82977	3.57698	0.870726	0.89495	0.95483	150.465	0	Inactive	-1	-1	-1
720	CHEMBL463904	1.77571	4	1	0	0	0.0328063	-0.322582	1.05022	3.3143	3.144	0.983881	0.972313	0.63201	162.362	0	Inactive	-1	-1	-1
721	CHEMBL270823	1.9779	7	0	0	0	0.0362253	0.0263093	1.24217	3.71503	3.29788	0.997422	1.23464	0.73687	152.39	0	Inactive	-1	-1	-1
722	CHEMBL135038	1.91865	14	4	0	0	0.0258518	-0.127068	1.24576	3.87961	3.64263	0.918433	0.970513	0.96806	153.578	0	Inactive	-1	-1	-1
723	CHEMBL3104865	1.92558	15	3	0.08	0	0.0285384	-0.263872	1.27314	3.58998	3.2703	0.622314	0.648617	1.00185	151.795	0	Inactive	-1	-1	-1
724	CHEMBL562539	2.00115	9	0	0.02174	0	0.0305826	-0.0471601	1.61687	3.75023	3.41923	1.01919	1.17708	0.84159	147.347	0	Inactive	-1	-1	-1
725	CHEMBL208621	1.94291	16	1	0.0303	1.46737	0.0240684	0.186934	1.47185	3.8015	3.65529	0.665751	0.957478	1.17845	150.07	0	Inactive	-1	-1	-1
726	CHEMBL1830325	1.9441	14	4	0.01786	0	0.0246834	-0.0709098	1.31597	3.84246	3.47579	0.913309	0.938381	0.92934	152.111	0	Inactive	-1	-1	-1
727	CHEMBL1163669	2.098	9	3	0.02083	0	0.0215705	-0.0130622	1.2452	3.42916	3.33532	0.808616	0.571657	1.06353	156.022	0	Inactive	-1	-1	-1
728	CHEMBL68362	2.01355	6	5	0	3.1994	0.0239909	0.018176	1.28143	3.65806	3.62463	0.822435	0.86959	0.86904	155.544	0.0429923	Inactive	-1	-1	-1
729	CHEMBL1929349	1.97352	7	3	0	3.51498	0.0230982	-0.149097	1.15233	3.46195	3.342	0.874487	0.768793	0.92885	151.999	0.0350252	Inactive	-1	-1	-1
730	CHEMBL444412	1.89463	7	3	0	1.3228	0.0286722	0.107202	1.21462	3.67254	3.51236	0.827525	1.0934	0.88791	156.984	0	Inactive	-1	-1	-1
731	CHEMBL81648	1.92549	6	0	0.02273	0	0.0251359	-0.0301252	1.12534	3.57503	3.38506	0.912024	0.901955	0.78463	163.151	0	Inactive	-1	-1	-1
732	CHEMBL286905	1.86677	1	1	0	0	0.0326187	0.0414147	1.01553	3.32522	3.22884	0.896228	1.27889	0.63452	153.764	0	Inactive	-1	-1	-1
733	CHEMBL1939733	1.59047	0	1	0	0	0.0269322	-0.00738982	1.14007	3.40988	3.24351	1.0593	1.27058	0.72506	166.208	0	Inactive	-1	-1	-1
734	CHEMBL241698	1.98211	10	0	0	1.64622	0.0222845	-0.151322	1.29483	3.5396	3.20938	0.642149	0.763508	0.97483	158.202	0.00449958	Inactive	-1	-1	-1
735	CHEMBL3581853	2.05055	14	0	0.01613	6.14903	0.0263988	0.154385	1.42619	3.79083	3.7229	0.800729	0.870389	1.08427	151.711	0.0351677	Inactive	-1	-1	-1
736	CHEMBL747	1.93896	9	2	0	0	0.0191721	-0.0320713	1.07805	3.45901	2.96129	0.554959	0.930096	0.77649	147.706	0	Inactive	-1	-1	-1
737	CHEMBL1172333	1.96361	9	0	0	5.01919	0.0386288	-0.0620502	1.13262	3.75444	3.37611	1.06224	0.96009	0.67695	152.434	0.0294628	Inactive	-1	-1	-1
738	CHEMBL497514	1.85706	4	0	0	0	0.0419496	-0.162948	0.989031	3.38087	3.29434	0.997844	1.12077	0.55454	159.128	0	Inactive	-1	-1	-1
739	CHEMBL1094534	2.03204	17	3	0.05714	0	0.0254287	-0.150227	1.3936	3.87136	3.49305	0.76546	0.751341	1.20488	151.38	0	Inactive	-1	-1	-1
740	CHEMBL1822432	1.9654	16	0	0.03125	0	0.0370802	0.0193224	1.49336	3.80159	3.67827	0.992405	1.1445	1.07626	148.245	0	Inactive	-1	-1	-1
741	CHEMBL2408801	2.08775	7	1	0.02381	0	0.0234496	-0.261033	1.18037	3.4943	3.25564	0.770449	0.713572	0.88136	151.399	0	Inactive	-1	-1	-1
742	CHEMBL472	1.96782	12	5	0.08621	0	0.0238949	-0.175533	1.34969	3.64876	3.23209	0.745618	0.640923	1.07483	157.636	0	Inactive	-1	-1	-1
743	CHEMBL55657	1.97342	12	2	0.04	1.75283	0.0222688	-0.0080577	1.19558	3.58898	3.38619	0.745199	0.746547	0.94335	152.226	0.0833333	Inactive	-1	-1	-1
744	CHEMBL479692	1.92686	15	5	0.09459	0	0.0238749	-0.141081	1.33717	3.87149	3.76619	0.884458	0.827444	1.19113	155.311	0	Inactive	-1	-1	-1
745	CHEMBL510457	2.16001	9	0	0	0	0.0246773	-0.137769	1.22347	3.5578	3.13833	0.813834	0.927911	0.90284	141.414	0	Inactive	-1	-1	-1
746	CHEMBL3121246	1.85075	6	3	0.04762	0.808034	0.0203284	-0.0307264	1.20626	3.42891	3.30692	0.615152	1.00213	0.93164	154.071	0	Inactive	-1	-1	-1
747	CHEMBL137883	1.94434	12	1	0.04348	0	0.0269935	0.0261764	1.19322	3.57519	3.38266	0.890546	0.771907	0.98335	154.797	0	Inactive	-1	1	-1
748	CHEMBL495833	1.8705	7	4	0	0	0.0268511	-0.207526	1.33005	3.62129	3.33021	0.688117	0.835554	0.82268	156.066	0	Inactive	-1	-1	-1
749	CHEMBL220930	1.98894	14	2	0.04286	3.53907	0.0214723	-0.157669	1.27606	3.74689	3.56057	0.592125	0.776494	1.24675	163.237	0.00389675	Inactive	-1	-1	-1
750	CHEMBL2316653	1.98712	10	0	0.02273	1.38918	0.0228684	0.134669	1.83056	3.51729	3.20703	0.390808	0.726152	0.91743	150.063	0.0728931	Inactive	-1	-1	-1
751	CHEMBL294009	1.89717	12	0	0.04545	1.94512	0.022548	-0.133635	1.36863	3.51013	3.24568	0.622923	1.03021	1.08277	153.668	0.00449958	Inactive	-1	-1	-1
752	CHEMBL1780021	2.04934	14	1	0.02273	0	0.023802	-0.244646	1.29786	3.53584	3.33302	0.894571	0.904435	1.01667	146.838	0	Inactive	-1	-1	-1
753	CHEMBL208713	2.03914	6	0	0.05556	0.9183	0.0344621	0.178659	1.48784	3.38413	3.09441	0.699348	0.883936	0.86897	149.799	0.335851	Inactive	-1	-1	-1
754	CHEMBL172918	1.81382	3	1	0.03448	0	0.0258752	0.18899	1.41986	3.67689	3.5645	0.588724	0.754772	0.95362	161.593	0	Inactive	-1	-1	-1
755	CHEMBL560430	1.98154	10	2	0.01923	0	0.0318716	-0.154851	1.34494	3.63933	3.40991	0.80533	0.824071	1.00047	150.216	0	Inactive	-1	-1	-1
756	CHEMBL2431516	2.10126	11	4	0.01786	0	0.0185826	-0.16286	1.37045	3.62436	3.47252	0.79262	0.762439	1.09547	155.48	0	Inactive	-1	-1	-1
757	CHEMBL1822000	2.01546	14	1	0.02083	0	0.0208964	-0.105826	1.53203	3.77534	3.39661	0.781116	1.00765	1.06418	144.356	0	Inactive	-1	-1	-1
758	CHEMBL136728	1.97385	10	3	0.06897	2.00685	0.0207637	-0.108802	1.22824	3.62099	3.42536	0.671051	0.782268	1.10847	152.613	0.0194796	Inactive	-1	-1	-1
759	CHEMBL118165	2.00826	7	4	0	0	0.0238264	-0.0218968	1.32327	3.84271	3.50008	0.844279	0.823104	0.98469	154.242	0	Inactive	-1	-1	-1
760	CHEMBL290691	2.11652	13	1	0	1.62741	0.0253066	-0.082112	1.75262	3.71481	3.39392	0.761607	0.814652	0.75223	146.49	0.211289	Inactive	-1	-1	-1
761	CHEMBL323197	1.91926	12	5	0.06897	0	0.0207241	-0.101073	1.22191	3.56876	3.39692	0.903112	0.869183	1.04734	155.04	0	Inactive	-1	-1	-1
762	CHEMBL1290538	1.93191	11	3	0.08696	0	0.028621	-0.317007	1.16039	3.47213	3.24072	0.724616	0.704472	0.94621	153.77	0	Inactive	-1	-1	-1
763	CHEMBL12799	1.72911	1	0	0	0	0.0328676	-0.125205	1.07356	3.31079	2.70424	0.984057	1.04084	0.52531	163.781	0	Inactive	-1	-1	-1
764	CHEMBL508480	1.91349	13	0	0.07895	0	0.0263338	-0.152794	1.42978	3.44011	2.99726	0.662206	0.989786	0.99918	142.205	0	Inactive	-1	-1	-1
765	CHEMBL1078567	1.90393	2	0	0	1.67081	0.0706943	-0.116276	1.12396	3.56805	3.21504	0.806269	0.982509	0.33868	152.48	0.0484123	Inactive	-1	-1	-1
766	CHEMBL446640	2.13402	2	1	0	10.8776	0.0454493	-0.114613	1.01813	3.73059	3.5473	0.948714	0.988083	0.30677	152.143	0.586095	Inactive	-1	-1	-1
767	CHEMBL1172956	2.07416	12	0	0.03333	1.88176	0.024225	0.0735901	1.58061	3.81905	3.67345	0.549979	0.675325	1.14568	150.966	0.0975198	Inactive	-1	-1	-1
768	CHEMBL93341	1.9957	10	2	0.04167	0	0.0264454	-0.0838218	1.18721	3.77406	3.36866	1.03572	0.87135	0.8826	153.735	0	Inactive	-1	-1	-1
769	CHEMBL3354452	2.13778	10	0	0	5.51099	0.0383466	-0.0228778	1.19196	3.81473	3.60627	1.06612	1.09089	0.67581	148.763	0.0395285	Inactive	-1	-1	-1
770	CHEMBL1760523	2.1009	10	0	0.03448	0	0.0239613	-0.0796543	1.46459	3.81449	3.60764	0.546546	0.647098	1.16599	151.427	0.0122858	Inactive	-1	-1	-1
771	CHEMBL1290576	1.99458	5	3	0.04167	0	0.0259523	-0.0813796	1.14516	3.48926	3.27058	0.853394	0.780054	0.85011	155.721	0	Inactive	-1	-1	-1
772	CHEMBL589509	2.02845	16	1	0.02273	0	0.0236151	-0.218279	1.33847	3.57549	3.30885	0.883961	0.942215	1.00806	146.715	0	Inactive	-1	-1	-1
773	CHEMBL1213851	1.92959	11	3	0.08696	0	0.0211602	-0.217458	1.1948	3.48145	3.15753	0.771748	0.890426	1.02867	151.224	0	Inactive	-1	-1	-1
774	CHEMBL1770842	2.09679	11	0	0	2.57514	0.0222113	-0.188238	1.21245	3.74843	3.39101	0.634265	0.922258	1.19436	152.581	0.00389675	Inactive	-1	-1	-1
775	CHEMBL374411	2.06131	10	4	0.03846	0	0.0252301	-0.171167	1.24387	3.64292	3.24651	0.818063	0.746286	0.92228	152.309	0	Inactive	-1	1	-1
776	CHEMBL1780011	1.78638	6	2	0.05263	0	0.0383733	0.0909008	1.41928	3.56749	3.21849	0.585422	0.861721	0.62788	155.527	0	Inactive	-1	-1	-1
777	CHEMBL485983	2.08364	15	0	0.01786	0	0.02213	-0.0668105	1.55511	3.86628	3.46884	0.828462	0.915103	1.11772	152.067	0	Inactive	-1	1	-1
778	CHEMBL594860	1.95078	14	1	0.04762	0	0.0279248	-0.0990498	1.41259	3.53341	3.38115	0.757893	0.967746	0.95458	145.566	0	Inactive	-1	-1	-1
779	CHEMBL3104868	1.91701	10	2	0.04412	3.16598	0.0206618	-0.151375	1.23929	3.76695	3.56003	0.587785	0.754995	1.23722	165.622	0.00389675	Inactive	-1	-1	-1
780	CHEMBL1770811	1.98418	16	2	0	0	0.0252897	-0.0590134	1.32063	3.90972	3.81077	0.89545	0.859811	1.1236	153.971	0	Inactive	-1	-1	-1
781	CHEMBL3103565	1.92535	12	1	0.025	0	0.0218125	-0.135454	1.4104	3.47653	3.236	0.738221	1.02963	0.92293	145.045	0	Inactive	-1	-1	-1
782	CHEMBL1822423	2.08752	10	0	0	3.92564	0.0352581	-0.127326	1.26876	3.76804	3.38558	0.962923	0.968066	0.8362	151.478	0.0790569	Inactive	-1	-1	-1
783	CHEMBL1782667	1.97779	10	0	0.02273	1.74681	0.0206875	-0.0848861	1.37924	3.49026	3.32023	0.591472	0.938441	1.0366	159.498	0.00449958	Inactive	-1	-1	-1
784	CHEMBL465847	1.90994	12	4	0.05556	0	0.0191294	-0.132694	1.23849	3.59227	3.34178	0.772045	0.999784	1.06992	149.915	0	Inactive	-1	-1	-1
785	CHEMBL3753913	1.70991	1	3	0	0	0.0278693	-0.15797	1.07652	3.67938	3.3959	0.945264	1.16976	0.85792	161.604	0	Inactive	-1	-1	-1
786	CHEMBL1214741	1.89537	17	2	0.07407	0	0.0242725	-0.174866	1.23738	3.67388	3.37968	0.835624	0.964221	1.09553	149.441	0	Inactive	-1	-1	-1
787	CHEMBL237170	1.9598	16	2	0.01316	0	0.0322979	-0.0447068	1.28366	3.88144	3.74394	0.943492	0.960749	1.04265	155.698	0.00849986	Inactive	-1	-1	-1
788	CHEMBL1770933	2.01772	18	1	0.03448	0	0.0302695	-0.0765355	1.64633	3.82754	3.50968	0.937112	0.947703	1.14192	142.831	0	Inactive	-1	-1	-1
789	CHEMBL198660	2.01463	18	1	0.02857	0	0.023143	-0.0536858	1.51248	3.85963	3.68201	0.86583	0.98281	1.12605	152.917	0	Inactive	-1	-1	-1
790	CHEMBL121537	1.98367	15	2	0.01786	0	0.0336802	0.0155125	1.44203	3.85077	3.60783	0.636226	0.798356	0.89999	150.966	0	Inactive	-1	-1	-1
791	CHEMBL2377315	1.99145	8	1	0.02273	0	0.0342074	-0.0190031	1.0746	3.54885	3.3814	1.08439	0.922137	0.74767	158.188	0	Inactive	-1	-1	-1
792	CHEMBL475131	1.93189	19	3	0.02941	0	0.0259526	-0.159218	1.25009	3.87815	3.60189	0.96247	0.98051	1.15354	150.842	0	Inactive	-1	-1	-1
793	CHEMBL2087260	1.85337	0	0	0	1.8169	0.0637364	-0.166787	1.19199	3.45868	3.32933	0.875361	1.19486	0.67307	157.785	0.140287	Inactive	-1	-1	-1
794	CHEMBL1796565	1.92568	14	4	0.03571	0	0.0250428	-0.117312	1.4879	3.83998	3.46884	0.780495	0.869245	0.91458	149.154	0	Inactive	-1	-1	-1
795	CHEMBL1673065	1.91418	6	2	0.02273	0.635658	0.0278074	-0.0850817	1.4196	3.50186	3.31271	0.609936	0.859897	0.93133	152.9	0	Inactive	-1	-1	-1
796	CHEMBL218048	1.95073	10	1	0.03704	0	0.0404462	-0.135516	1.16957	3.802	3.40046	1.09908	0.906906	0.74551	158.66	0	Inactive	-1	-1	-1
797	CHEMBL220442	2.07619	20	0	0.01471	0	0.0293258	-0.0690757	1.73711	3.90407	3.55516	0.883505	1.00149	1.28527	140.133	0	Inactive	-1	-1	-1
798	CHEMBL2316663	1.83026	5	1	0.02778	0	0.0374405	-0.118738	0.998796	3.58808	3.16866	1.13032	0.905703	0.56991	162.191	0	Inactive	-1	-1	-1
799	CHEMBL398522	2.06664	9	1	0	2.73238	0.0221879	-0.197157	1.24775	3.62081	3.50429	0.661603	0.821074	1.1545	148.751	0.0476126	Inactive	-1	-1	-1
800	CHEMBL3581838	1.94702	9	0	0	0	0.0346207	0.0668575	1.10769	3.51289	3.1862	1.09262	0.903317	0.77976	154.667	0	Inactive	-1	-1	-1
801	CHEMBL1796415	1.94802	12	4	0.01724	0	0.0244846	-0.139599	1.22688	3.86616	3.4696	0.855493	0.954276	0.90167	151.237	0	Inactive	-1	-1	-1
802	CHEMBL596251	1.9716	17	1	0.01613	0	0.0217105	-0.0298386	1.5779	3.83735	3.65123	0.71249	0.821228	1.2357	150.418	0	Inactive	-1	-1	-1
803	CHEMBL204688	2.09253	1	1	0	6.06917	0.0447778	-0.150442	0.917877	3.62748	3.35529	0.811375	1.06093	0.58553	150.634	0.138052	Inactive	-1	-1	-1
804	CHEMBL118855	1.9396	5	3	0	1.96519	0.0225583	-0.0194392	1.08905	3.51366	3.29759	0.790757	0.838036	0.8612	153.587	0.0278757	Inactive	-1	-1	-1
805	CHEMBL509932	2.13561	7	1	0.01389	5.37151	0.0333816	-0.0355682	1.02784	3.79725	3.55832	0.823546	0.941039	0.79976	151.049	0.137716	Inactive	-1	-1	-1
806	CHEMBL1214821	1.89442	6	1	0.03704	0	0.0224168	0.0303753	1.21256	3.72264	3.55057	0.799768	0.948695	0.95425	158.991	0	Inactive	-1	1	-1
807	CHEMBL1668541	1.86285	6	2	0.03125	1.21419	0.028786	0.108842	0.964883	3.50008	3.0528	0.909015	1.00526	0.57124	160.029	0	Inactive	-1	-1	-1
808	CHEMBL1552197	1.97762	18	1	0.05	1.97042	0.0231464	-0.108572	1.49325	3.82142	3.45831	0.609771	0.830722	1.12445	155.008	0.00449958	Inactive	-1	-1	-1
809	CHEMBL7709	2.13393	18	0	0.07143	0	0.0233229	-0.00565166	1.44295	3.77844	3.58174	0.757223	0.945201	1.36706	142.407	0.0317219	Inactive	-1	-1	-1
810	CHEMBL1929341	1.92347	11	0	0.02381	0	0.0267935	-0.0613364	1.73055	3.50425	3.24875	0.552374	0.740182	0.95764	144.357	0	Inactive	-1	-1	-1
811	CHEMBL138650	2.13269	21	3	0.04167	0	0.0218365	-0.0920498	1.45621	3.86509	3.80355	0.908114	0.911691	1.20921	148.961	0	Inactive	-1	-1	-1
812	CHEMBL2088678	2.14426	8	2	0.04688	0	0.0261925	-0.0168622	1.24413	3.62303	3.50936	0.857036	0.834771	0.96579	152.628	0	Inactive	-1	-1	-1
813	CHEMBL1212959	1.98413	11	1	0.09524	0	0.0184072	-0.145804	1.06663	3.28946	3.21581	0.623679	0.75849	1.1167	151.605	0	Inactive	-1	-1	-1
814	CHEMBL3120848	1.96898	17	0	0	0	0.0312415	-0.104421	1.63017	3.79945	3.43344	1.00309	1.03982	0.97962	140.122	0	Inactive	-1	-1	-1
815	CHEMBL139800	1.93095	13	1	0.05263	0	0.028116	-0.253682	1.38133	3.4526	3.11974	0.718806	0.832791	0.93803	146.424	0	Inactive	-1	-1	-1
816	CHEMBL3103529	1.92992	10	0	0.07143	0	0.0316957	-0.0555402	1.48516	3.48818	3.28984	0.572033	0.779739	0.88465	147.904	0	Inactive	-1	-1	-1
817	CHEMBL199934	1.89148	16	4	0.06061	0	0.0235252	-0.131191	1.24428	3.68522	3.48582	0.747094	0.948713	1.15839	152.729	0	Inactive	-1	-1	-1
818	CHEMBL222017	2.02633	12	2	0	0	0.0302217	0.0172087	1.24293	3.77247	3.55688	0.884881	1.1535	0.95835	151.497	0	Inactive	-1	-1	-1
819	CHEMBL1290577	1.86982	13	3	0.06818	0	0.0192898	-0.193979	1.31072	3.45967	3.20153	0.7338	0.810975	1.03169	151.327	0	Inactive	-1	-1	-1
820	CHEMBL280410	1.97896	11	5	0.09615	0	0.0190051	-0.212482	1.25518	3.47604	3.20915	0.74644	0.616624	1.12986	155.036	0	Inactive	-1	-1	-1
821	CHEMBL1822430	2.04919	17	1	0.02083	0	0.0220835	-0.0671918	1.49725	3.73441	3.39591	0.775785	1.0359	1.06073	142.148	0	Inactive	-1	-1	-1
822	CHEMBL137913	1.95313	9	0	0.02381	0	0.0329551	0.00717089	1.07524	3.56238	3.30008	1.03563	0.754089	0.82615	159.319	0	Inactive	-1	-1	-1
823	CHEMBL443023	1.96775	4	3	0	0	0.0285282	-0.0167005	1.12576	3.52443	3.31456	0.871953	0.902155	0.73271	153.914	0	Inactive	-1	-1	-1
824	CHEMBL2041119	1.93935	15	2	0.10938	0	0.0206597	-0.111813	1.35981	3.84386	3.48019	0.684039	1.17672	1.25863	145.618	0	Inactive	-1	-1	-1
825	CHEMBL561402	1.91794	13	2	0.01613	1.43009	0.0254878	0.0667115	1.34671	3.80827	3.65678	0.824105	0.981041	0.94796	156.735	0	Inactive	-1	1	-1
826	CHEMBL3298971	2.00306	7	1	0	0	0.0298837	0.0354939	1.2574	3.79486	3.53529	1.0306	1.07923	0.73301	153.269	0	Inactive	-1	-1	-1
827	CHEMBL1927483	1.93384	5	1	0.04348	0	0.0226675	0.0385221	1.32015	3.74468	3.31045	0.882149	0.90724	0.89997	154.591	0	Inactive	-1	-1	-1
828	CHEMBL3793864	2.03649	6	3	0.05172	0	0.030079	0.0615595	1.11286	3.73774	3.49473	0.906806	0.950875	0.83022	154.51	0	Inactive	-1	-1	-1
829	CHEMBL270317	1.9616	11	2	0	0	0.0247516	-0.0302611	1.34155	3.89389	3.70827	0.854583	0.82797	1.10191	157.356	0	Inactive	-1	1	-1
830	CHEMBL3343684	1.98644	7	1	0	0.723451	0.0280212	0.201017	1.16207	3.67529	3.61479	0.788767	1.08449	0.97882	156.577	0.00981479	Inactive	-1	-1	-1
831	CHEMBL1568222	2.15604	1	0	0	15.7236	0.0450187	-0.154661	0.983705	3.73329	3.47222	0.875687	1.00479	0.29993	150.034	0.60342	Inactive	-1	-1	-1
832	CHEMBL231008	1.93253	7	1	0.05556	0	0.0187602	-0.223024	1.24582	3.27324	3.07247	0.634056	0.689322	0.97861	149.427	0	Inactive	-1	-1	-1
833	CHEMBL2408987	1.87778	6	1	0.03571	0	0.0275247	-0.145619	1.12609	3.7387	3.4427	0.958491	0.879415	0.91234	163.393	0	Inactive	-1	-1	-1
834	CHEMBL280040	1.90693	15	2	0.02632	0	0.0309342	-0.036095	1.24581	3.88048	3.74378	0.932402	0.99499	1.04602	156.156	0	Inactive	-1	-1	-1
835	CHEMBL1214486	1.91949	12	2	0.03704	1.89768	0.0228784	-0.116965	1.46109	3.67779	3.46547	0.593273	0.898363	0.98141	155.265	0	Inactive	-1	-1	-1
836	CHEMBL367788	1.96736	21	5	0.03571	0	0.0235327	-0.0842956	1.36661	3.87431	3.83951	0.898874	0.928029	1.24829	149.079	0	Inactive	-1	-1	-1
837	CHEMBL150471	1.87439	20	2	0.03659	0	0.0233672	-0.0698014	1.26856	3.91795	3.8302	0.747755	0.90302	1.21452	151.96	0	Inactive	-1	-1	-1
838	CHEMBL1929189	1.96827	20	0	0	0	0.0187434	0.0286964	1.49561	3.84215	3.6312	0.745938	1.00853	1.21983	154.053	0	Inactive	-1	-1	-1
839	CHEMBL1835177	1.87257	6	2	0.05263	0	0.071535	0.120044	1.57582	3.54833	3.20788	0.577767	0.898394	0.59066	153.61	0	Inactive	-1	-1	-1
840	CHEMBL2408335	2.00861	12	0	0.01515	0	0.0280861	-0.132966	1.18875	3.80346	3.56967	0.79262	0.885161	0.99092	155.311	0	Inactive	-1	1	-1
841	CHEMBL582666	1.95452	11	1	0.06522	0	0.0188398	0.0973352	1.38162	3.62022	3.23254	0.606275	0.991307	1.02236	146.66	0	Inactive	-1	-1	-1
842	CHEMBL2374205	1.95456	21	1	0.025	0	0.0247771	-0.0229311	1.43048	3.89971	3.78939	0.825791	0.981741	1.29288	147.671	0	Inactive	-1	-1	-1
843	CHEMBL1289996	2.06513	21	4	0.0625	0	0.0217807	-0.208552	1.32467	3.88159	3.79068	0.740235	0.757286	1.2506	152.891	0	Inactive	-1	-1	-1
844	CHEMBL1689609	1.96266	6	3	0.06897	0	0.0254587	0.100887	1.17049	3.67645	3.53102	0.972443	1.02552	0.77185	158.508	0	Inactive	-1	-1	-1
845	CHEMBL119102	1.98313	5	2	0	0	0.0261173	-0.0667516	1.16379	3.55201	3.29773	0.862611	0.846607	0.78712	154.239	0	Inactive	-1	-1	-1
846	CHEMBL257013	1.95744	14	3	0.05405	0	0.0291033	-0.0911152	1.15477	3.64935	3.56659	0.819458	0.885592	0.90228	155.568	0	Inactive	-1	-1	-1
847	CHEMBL2315380	1.94789	11	6	0.10345	0	0.0257338	-0.0856794	1.18311	3.53904	3.39686	0.909968	0.753278	0.98739	158.017	0	Inactive	-1	-1	-1
848	CHEMBL556490	1.99463	11	1	0.025	0	0.0230351	-0.204425	1.2648	3.47362	3.14193	0.860443	0.728901	0.89184	152.721	0	Inactive	-1	-1	-1
849	CHEMBL260079	1.61506	1	1	0	0	0.0225607	0.0194066	1.0585	3.52575	3.28825	1.06051	1.39718	0.85154	165.341	0	Inactive	-1	-1	-1
850	CHEMBL176545	1.98563	15	0	0.01389	0	0.0372404	-0.0410315	1.33401	3.88017	3.73114	0.851631	0.92801	1.00067	154.213	0.00849986	Inactive	-1	-1	-1
851	CHEMBL2207701	2.12164	1	0	0	11.7426	0.0444233	-0.143333	0.960864	3.73497	3.55425	0.929135	1.07014	0.40882	150.99	0.558634	Inactive	-1	-1	-1
852	CHEMBL1082119	2.01394	16	3	0.0625	0	0.0254113	-0.226741	1.38441	3.87089	3.47474	0.743829	0.747761	1.16574	150.318	0	Inactive	-1	-1	-1
853	CHEMBL1173759	1.9571	21	0	0.025	0	0.0269969	0.0296839	1.44452	3.87975	3.77223	0.938133	0.979343	1.26401	152.099	0	Inactive	-1	-1	-1
854	CHEMBL490100	2.06837	16	0	0	0	0.0209297	-0.0821049	1.49582	3.70727	3.36935	0.819652	0.971712	1.04065	144.249	0	Inactive	-1	-1	-1
855	CHEMBL1689604	1.87843	5	1	0	0	0.0192607	-0.0785301	1.31874	3.41039	3.20601	0.710012	0.905538	1.00689	150.787	0	Inactive	-1	-1	-1
856	CHEMBL1272013	1.83551	0	0	0	2.78208	0.0595785	0.209429	1.3212	3.68766	3.60073	0.751139	0.798919	0.81998	163.459	0	Inactive	-1	-1	-1
857	CHEMBL1782670	1.93025	10	1	0	0	0.0272424	-0.14602	1.22683	3.74466	3.49377	0.896912	0.946434	1.05979	157.339	0	Inactive	-1	-1	-1
858	CHEMBL1077876	2.02269	6	1	0	2.06117	0.0234658	0.045536	1.1844	3.51077	3.32657	0.636174	0.818932	0.87005	147.986	0.051031	Inactive	-1	-1	-1
859	CHEMBL2408794	1.89446	0	3	0	2.4418	0.0416425	-0.0449571	0.943341	3.48772	3.31292	0.83274	1.23606	0.51321	156.698	0	Inactive	-1	-1	-1
860	CHEMBL1169695	1.93861	20	6	0.07895	0	0.0227343	-0.24101	1.23799	3.87493	3.52556	0.863632	0.669226	1.25632	154.46	0	Inactive	-1	-1	-1
861	CHEMBL1215631	2.14093	2	2	0	10.8776	0.0448291	-0.11662	1.04746	3.74639	3.54942	0.902426	0.982369	0.39	152.738	0.586095	Inactive	-1	-1	-1
862	CHEMBL460690	1.95333	15	1	0.04167	0	0.0229098	-0.182638	1.22492	3.72244	3.22995	0.601599	0.905725	0.98956	148.114	0	Inactive	-1	1	-1
863	CHEMBL254315	1.97903	18	0	0	0	0.0197797	-0.0699551	1.40598	3.8418	3.55899	0.911941	0.978596	1.07282	154.212	0	Inactive	-1	-1	-1
864	CHEMBL1927488	1.97166	9	0	0.04348	1.60094	0.0267372	0.0224187	1.25217	3.58548	3.37543	0.61857	0.835946	0.92475	150.541	0.0833333	Inactive	-1	-1	-1
865	CHEMBL161009	1.8107	5	0	0.08333	0	0.0199704	-0.340309	0.678989	2.93799	2.75751	0.723124	1.20109	0.87892	150.257	0	Inactive	-1	-1	-1
866	CHEMBL464355	1.93264	7	1	0.02	0	0.0206621	0.0845546	1.25888	3.64613	3.49315	0.892276	0.978686	0.98817	157.385	0	Inactive	-1	-1	-1
867	CHEMBL60487	1.95416	19	4	0.07576	0	0.0239714	-0.244402	1.29113	3.84722	3.48545	0.876555	0.765088	1.16208	151.566	0	Inactive	-1	-1	-1
868	CHEMBL1213046	2.12379	2	0	0	10.8776	0.0455481	-0.119574	0.962876	3.73047	3.54317	0.926598	1.03358	0.29495	151.143	0.586095	Inactive	-1	-1	-1
869	CHEMBL3577103	1.84104	14	3	0.04651	0	0.0220625	-0.0843471	1.24494	3.88127	3.80966	0.79109	0.980442	1.22674	156.645	0	Inactive	-1	-1	-1
870	CHEMBL230957	1.87458	10	2	0.06667	0	0.0186326	-0.0430753	1.18471	3.69996	3.29758	0.761272	1.1853	1.16115	148.149	0	Inactive	-1	-1	-1
871	CHEMBL592724	1.84533	13	4	0.06061	0	0.0195246	-0.0740648	1.24978	3.78164	3.44682	0.836104	1.09556	1.13435	151.131	0	Inactive	-1	-1	-1
872	CHEMBL600589	1.913	13	3	0.08696	0	0.0230289	-0.223256	1.19437	3.46909	3.19529	0.825737	0.758064	1.0561	154.386	0	Inactive	-1	-1	-1
873	CHEMBL510738	2.02097	17	0	0.01786	0	0.0311113	0.0461245	1.68453	3.83534	3.50946	0.906532	0.981989	1.1107	141.166	0	Inactive	-1	-1	-1
874	CHEMBL61	2.04042	14	1	0.04348	0	0.022831	-0.22112	1.24546	3.53507	3.32128	0.812475	0.906478	1.07101	148.227	0	Inactive	-1	-1	-1
875	CHEMBL63976	1.85387	5	0	0	0	0.0375989	-0.0403043	1.06049	3.12993	2.77182	1.22273	1.12927	0.5816	156.171	0	Inactive	-1	-1	-1
876	CHEMBL1929342	2.12931	10	1	0.02381	5.51641	0.0358066	-0.0458387	1.03604	3.81066	3.72688	0.802616	0.886928	0.75793	153.584	0.137716	Inactive	-1	-1	-1
877	CHEMBL224258	1.99397	16	3	0.0303	0	0.0194597	-0.0662518	1.31305	3.7773	3.56116	0.764348	0.87534	1.22372	145.562	0	Inactive	-1	-1	-1
878	CHEMBL3752177	1.91513	13	1	0.02632	0	0.0270481	-0.174757	1.24772	3.47753	3.29124	0.958137	1.05946	0.89411	147.361	0	Inactive	-1	-1	-1
879	CHEMBL2381691	2.12814	3	0	0	13.074	0.0455638	-0.11495	0.972053	3.73143	3.54802	0.907424	1.04283	0.30176	150.956	0.586095	Inactive	-1	-1	-1
880	CHEMBL1770922	1.8891	6	1	0.02174	1.78807	0.0376875	-0.195564	1.28478	3.61753	3.32933	0.926326	1.20142	0.92544	157.79	0.140287	Inactive	-1	-1	-1
881	CHEMBL1214818	1.82242	13	6	0.04762	0	0.0299971	-0.1237	1.22978	3.78352	3.70637	1.05792	0.882185	0.95583	158.073	0	Inactive	-1	-1	-1
882	CHEMBL1098220	2.08945	17	0	0.05172	0	0.024764	-0.0562093	1.44744	3.81668	3.57376	0.759084	1.00407	1.22279	147.184	0.0169997	Inactive	-1	1	-1
883	CHEMBL2377300	1.86943	9	2	0	0.820665	0.0260179	0.138258	1.22511	3.77856	3.61684	0.776071	1.05459	0.94801	158.252	0	Inactive	-1	-1	-1
884	CHEMBL1213980	1.9213	13	4	0.08333	0	0.0234642	-0.298732	1.14996	3.46533	3.21816	0.887428	0.678198	1.04044	155.355	0	Inactive	-1	-1	-1
885	CHEMBL67399	1.92563	14	5	0.03448	0	0.0235475	-0.15096	1.35932	3.84839	3.4715	0.91513	0.960848	0.93809	152.006	0	Inactive	-1	-1	-1
886	CHEMBL1098221	1.95507	9	1	0	0	0.0336945	0.0829573	1.12998	3.70165	3.48681	1.06724	0.965566	0.77528	155.36	0	Inactive	-1	-1	-1
887	CHEMBL555348	1.90086	12	1	0.01852	0	0.0318457	-0.130804	1.16106	3.80362	3.4621	1.05533	1.04697	0.82435	157.037	0	Inactive	-1	-1	-1
888	CHEMBL1780199	1.97505	16	3	0	0	0.0240347	-0.0624103	1.38356	3.90829	3.74512	0.916406	0.88032	1.14268	153.76	0	Inactive	-1	-1	-1
889	CHEMBL1090971	2.02019	14	1	0	0	0.0263282	-0.0342201	1.34928	3.81297	3.53743	0.98294	0.985512	0.98948	150.79	0	Inactive	-1	-1	-1
890	CHEMBL157930	2.02343	10	1	0	0	0.0333798	-0.0157123	1.25118	3.86812	3.68556	0.89837	1.11584	0.87877	151.955	0	Inactive	-1	-1	-1
891	CHEMBL251433	1.66358	1	0	0.09091	0	0.0169177	-0.408199	0.759533	2.97101	2.468	0.516178	0.675058	0.82972	168.152	0	Inactive	-1	-1	-1
892	CHEMBL3581798	2.03905	14	0	0.01786	6.03291	0.0292116	0.120976	1.46391	3.78833	3.67953	0.791112	0.8811	1.02716	147.589	0.03125	Inactive	-1	-1	-1
893	CHEMBL1080401	1.79989	6	0	0.07692	0	0.0250318	-0.0326712	1.27599	3.15836	2.77182	0.941707	1.12232	0.71928	159.496	0	Inactive	-1	-1	-1
894	CHEMBL1214097	2.07249	8	3	0.02174	0.986902	0.0207994	-0.0686237	1.33722	3.50009	3.33502	0.643941	0.828865	1.01358	150.944	0	Inactive	-1	-1	-1
895	CHEMBL2338378	1.9749	9	1	0	0	0.0233892	-0.0166955	1.20475	3.52269	3.41091	0.734037	0.948324	0.7193	152.735	0	Inactive	-1	-1	-1
896	CHEMBL1213386	1.94866	12	0	0.02632	0	0.0277756	-0.179405	1.58721	3.47776	3.12728	0.69557	0.942343	0.98644	141.033	0	Inactive	-1	-1	-1
897	CHEMBL1370243	2.14477	5	0	0	4.29331	0.0449459	0.055272	1.07443	3.6152	3.37314	1.01672	1.07751	0.60075	150.447	0	Inactive	-1	-1	-1
898	CHEMBL204953	1.77299	5	1	0	0	0.0422385	0.125761	0.960232	3.51311	3.11576	1.20337	1.10429	0.5513	157.173	0	Inactive	-1	-1	-1
899	CHEMBL388222	1.68752	2	2	0	0	0.0181019	0.0665819	1.17785	3.54618	3.30821	0.937701	1.10604	0.89338	161.887	0	Inactive	-1	-1	-1
900	CHEMBL374508	1.66966	1	0	0	0	0.0332364	0.0216975	0.959204	3.33279	2.70424	0.938373	1.1675	0.50913	160.878	0	Inactive	-1	-1	-1
901	CHEMBL483292	2.10627	14	2	0.05357	0	0.0245435	-0.187134	1.29887	3.68931	3.48875	0.728067	0.809728	1.09919	150.524	0.013736	Inactive	-1	-1	-1
902	CHEMBL1271625	1.98764	11	4	0.06522	0	0.0203432	-0.248135	1.21711	3.47217	3.14755	0.789902	0.671018	1.03595	152.785	0	Inactive	-1	-1	-1
903	CHEMBL1770929	1.87134	5	0	0	0	0.0364849	-0.174671	1.12924	3.31089	3.13386	0.900036	0.99293	0.59856	160.098	0	Inactive	-1	-1	-1
904	CHEMBL66816	1.9302	5	0	0	2.10665	0.0349675	-0.140944	1.17791	3.77736	3.42882	1.04379	1.00025	0.47191	152.955	0.0358305	Inactive	-1	-1	-1
905	CHEMBL1078769	2.01034	13	1	0.06	2.044	0.0240026	-0.134788	1.1976	3.61909	3.40487	0.753935	0.89615	1.04574	148.666	0.0416667	Inactive	-1	-1	-1
906	CHEMBL403494	1.70142	4	0	0.02273	0	0.0220171	0.149017	1.31481	3.73219	3.2446	0.725	1.15988	0.82793	157.817	0	Inactive	-1	-1	-1
907	CHEMBL826	1.79633	2	3	0	0.553275	0.0297974	0.136182	1.15404	3.68885	3.62437	0.794853	1.23084	0.95701	160.301	0	Inactive	-1	-1	-1
908	CHEMBL456615	2.01545	9	2	0.04	0	0.0235801	-0.302273	1.19216	3.49571	3.2605	0.684871	0.674048	0.94829	153.335	0	Inactive	-1	1	-1
909	CHEMBL556259	1.90278	11	0	0.03448	0	0.0286248	0.0600401	1.33376	3.80832	3.5078	0.894219	0.941202	1.04567	157.937	0	Inactive	-1	-1	-1
910	CHEMBL1795358	2.03515	19	0	0.02857	0	0.0249598	-0.0660048	1.59519	3.90966	3.65678	0.728317	0.951819	1.24733	147.451	0.00849986	Inactive	-1	-1	-1
911	CHEMBL1818633	1.90204	12	1	0.02778	0	0.0245179	-0.241901	1.28303	3.44749	3.1129	0.929929	0.957504	0.93479	149.543	0	Inactive	-1	-1	-1
912	CHEMBL3104739	1.77664	1	0	0	0	0.0355225	-0.0280295	0.978836	3.37526	3.05247	0.972985	1.26317	0.59563	159.96	0	Inactive	-1	-1	-1
913	CHEMBL594719	2.01377	9	1	0.02083	0	0.0309392	0.0137954	1.57824	3.60091	3.41906	0.982291	1.0989	0.84445	148.528	0	Inactive	-1	-1	-1
914	CHEMBL1237046	1.90045	10	0	0	0	0.0379713	0.138146	1.02487	3.68206	3.39026	1.1324	0.91041	0.78292	157.95	0	Inactive	-1	-1	-1
915	CHEMBL202782	2.00568	11	0	0.025	0	0.0232698	-0.0691568	1.67216	3.44271	3.15325	0.529887	0.596411	0.92731	147.486	0	Inactive	-1	-1	-1
916	CHEMBL211181	1.89292	7	0	0.02778	0	0.0385009	-0.0372584	1.06661	3.83767	3.64522	0.883703	1.03339	0.77729	159.076	0	Inactive	-1	1	-1
917	CHEMBL1215601	1.95448	11	1	0.04545	1.41257	0.018726	-0.0518154	1.59819	3.57474	3.17544	0.562077	0.873219	1.07551	158.514	0.00269975	Inactive	-1	-1	-1
918	CHEMBL2316667	1.93434	11	1	0.04545	0	0.0189274	-0.107569	1.40604	3.49357	3.19863	0.643322	1.03561	1.1524	144.005	0	Inactive	-1	-1	-1
919	CHEMBL67004	1.99907	8	0	0.03125	0	0.0299769	0.0631447	1.59319	3.41916	2.96578	0.567317	0.634496	0.7555	148.759	0	Inactive	-1	-1	-1
920	CHEMBL2316660	1.91946	6	0	0	0	0.0291231	-0.202824	0.99314	3.25103	3.12979	0.923282	0.998703	0.65273	152.105	0	Inactive	-1	-1	-1
921	CHEMBL1224167	1.94822	6	1	0.03333	1.52312	0.0242152	0.022976	1.11113	3.73279	3.4369	0.818807	1.00495	0.95736	154.704	0	Inactive	-1	-1	-1
922	CHEMBL3343690	1.99174	12	1	0	1.37605	0.0294042	0.126371	1.26616	3.80268	3.66461	0.830557	1.0723	1.0965	154.789	0.00981479	Inactive	-1	-1	-1
923	CHEMBL561124	2.06585	8	0	0.01316	1.53083	0.032566	0.0372045	1.13021	3.79264	3.66957	0.904859	1.00362	0.9392	157.627	0.0530046	Inactive	-1	-1	-1
924	CHEMBL3103566	1.95258	1	0	0	0	0.0407919	-0.0522504	0.978173	3.50573	3.33557	0.992257	1.18193	0.33663	154.204	0	Inactive	-1	-1	-1
925	CHEMBL513084	1.95882	11	2	0.04348	0	0.0219226	-0.224776	1.21855	3.47988	3.20315	0.743698	0.726536	0.97289	152.215	0	Inactive	-1	-1	-1
926	CHEMBL1927485	1.97274	8	0	0.02174	1.60544	0.0258013	-6.53e-06	1.11553	3.60612	3.33633	0.732963	0.906409	0.89619	151.482	0.0833333	Inactive	-1	-1	-1
927	CHEMBL594846	1.93943	15	0	0.05	0	0.0309632	-0.187293	1.5639	3.57508	3.14337	0.660838	0.908196	0.95095	141.733	0	Inactive	-1	-1	-1
928	CHEMBL559553	1.95559	22	0	0.04054	0	0.027607	-0.0155428	1.5125	3.88975	3.78753	0.613693	0.916572	1.22284	145.385	0	Inactive	-1	-1	-1
929	CHEMBL1807630	1.67793	1	2	0	0	0.0238294	-0.0799409	1.14938	3.47644	3.20637	0.987877	1.22266	0.80448	165.149	0	Inactive	-1	-1	-1
930	CHEMBL1213461	1.98926	13	0	0.05263	0	0.0280153	-0.110638	1.32812	3.53249	3.15835	0.934025	1.14061	0.9272	143.363	0	Inactive	-1	-1	-1
931	CHEMBL1223569	1.9564	11	0	0.05263	0	0.0245319	-0.141895	1.83833	3.42631	2.99522	0.581532	0.789742	0.9546	142.609	0	Inactive	-1	-1	-1
932	CHEMBL395170	1.98416	5	0	0.07143	0	0.0214029	-0.314097	1.05467	3.15383	2.86997	0.762364	0.974779	0.90166	153.91	0	Inactive	-1	-1	-1
933	CHEMBL59755	1.82304	13	3	0.06061	0	0.0179729	0.0211802	1.36231	3.79327	3.47137	0.790028	1.20601	1.20268	149.232	0	Inactive	-1	-1	-1
934	CHEMBL580352	1.88635	10	0	0.04167	0	0.0226676	-0.118753	1.29644	3.74524	3.42861	0.772663	1.11661	1.02557	154.887	0	Inactive	-1	-1	-1
935	CHEMBL255487	2.0229	12	0	0	0	0.020398	-0.0833684	1.46899	3.5955	3.12895	0.848525	0.98006	0.98348	146.358	0	Inactive	-1	-1	-1
936	CHEMBL210276	2.11334	4	0	0	11.9849	0.0424669	-0.108667	1.01129	3.73664	3.55292	0.859411	0.997892	0.50501	150.672	0.550129	Inactive	-1	-1	-1
937	CHEMBL1215530	1.88761	11	0	0.04348	1.06836	0.0201107	-0.08257	1.40905	3.56665	3.29446	0.560119	0.892198	1.10483	158.88	0.00301841	Inactive	-1	-1	-1
938	CHEMBL1213396	2.01256	10	3	0.0625	0	0.0240419	-0.214569	1.08776	3.56255	3.22829	0.842217	0.812764	0.95409	150.976	0	Inactive	-1	-1	-1
939	CHEMBL2391961	1.70743	3	0	0	0	0.0233408	-0.0231031	0.929406	3.04024	2.98459	0.773491	1.20996	0.80971	158.076	0	Inactive	-1	-1	-1
940	CHEMBL2431487	1.92799	14	0	0	0	0.0253609	-0.160837	1.15861	3.70729	3.43737	0.838891	0.924682	0.96837	154.027	0	Inactive	-1	-1	-1
941	CHEMBL2376556	1.90642	6	2	0.025	0.849686	0.0213761	-0.0181145	1.16524	3.46919	3.26056	0.631707	0.786324	0.91272	157.654	0	Inactive	-1	-1	-1
942	CHEMBL1835182	1.94853	11	3	0.04167	0	0.0289666	-0.00403369	1.15711	3.69136	3.39727	1.06944	0.946025	0.82697	156.116	0	Inactive	-1	-1	-1
943	CHEMBL391599	1.87371	6	0	0.02083	0	0.0230753	-0.0768996	1.17744	3.70583	3.51935	0.831255	1.01817	0.90965	157.818	0	Inactive	-1	1	-1
944	CHEMBL338983	2.0146	11	4	0.05556	1.9577	0.0245944	-0.0866146	1.11554	3.64034	3.34904	0.783815	0.84633	0.9144	151.949	0	Inactive	-1	-1	-1
945	CHEMBL3120846	1.68458	1	0	0.04545	0	0.014998	-0.450074	0.603164	3.08028	2.49296	0.82445	0.758275	0.81005	169.879	0	Inactive	-1	-1	-1
946	CHEMBL486865	2.04936	10	0	0.025	1.88413	0.0455616	0.0261426	1.2601	3.84227	3.67633	0.977792	1.11405	0.84469	153.007	0	Inactive	-1	-1	-1
947	CHEMBL1671880	1.86098	6	2	0.04167	0.635658	0.0184996	0.110844	1.45888	3.57149	3.37005	0.575568	0.798749	1.01023	160.23	0	Inactive	-1	-1	-1
948	CHEMBL1951009	2.09145	14	0	0	0	0.0263674	0.024836	1.35175	3.78799	3.64612	1.03036	0.968182	1.03958	146.365	0	Inactive	-1	1	-1
949	CHEMBL1170605	2.04901	16	1	0.02	0	0.0232692	-0.161665	1.51301	3.72447	3.4451	0.63732	0.876179	1.03673	142.265	0	Inactive	-1	-1	-1
950	CHEMBL1213463	2.17184	10	1	0.04762	0	0.0218935	-0.140492	1.56873	3.48212	3.25456	0.53877	0.569969	1.00763	144.507	0	Inactive	-1	-1	-1
951	CHEMBL1170359	1.99429	10	1	0.02273	0	0.0200331	-0.210353	1.38138	3.51735	3.19183	0.722902	0.636286	1.02295	150.614	0	Inactive	-1	-1	-1
952	CHEMBL1237212	1.77701	0	0	0	0	0.0688965	0.014813	1.30694	3.62921	3.45377	0.77949	0.843988	0.61177	161.783	0	Inactive	-1	-1	-1
953	CHEMBL1835277	1.98454	12	0	0	0	0.0316017	0.0177164	1.48649	3.58861	3.4354	1.03068	1.17264	1.05859	144.774	0	Inactive	-1	-1	-1
954	CHEMBL1770814	1.76032	2	0	0	0	0.0632858	-0.1831	1.26218	3.38594	3.16113	1.28812	1.25818	0.65577	164.187	0	Inactive	-1	-1	-1
955	CHEMBL1644942	1.97941	13	2	0	0	0.0337229	-0.0173791	1.25343	3.80208	3.69433	1.04098	1.02123	0.87793	154.845	0	Inactive	-1	-1	-1
956	CHEMBL306469	1.96192	13	0	0.04545	0	0.0337437	-0.224419	1.56675	3.54054	3.20329	0.860703	1.02192	0.97726	140.256	0	Inactive	-1	-1	-1
957	CHEMBL1269628	1.83257	15	4	0.03226	0	0.0225935	0.00337712	1.45108	3.83076	3.66297	0.806734	0.886123	1.10961	153.759	0	Inactive	-1	-1	-1
958	CHEMBL1928849	1.99578	9	2	0.04412	0	0.0294921	-0.0618454	1.15314	3.70097	3.57071	0.960639	1.0037	0.82318	155.046	0	Inactive	-1	-1	-1
959	CHEMBL1078436	1.8517	8	1	0.04167	0	0.0277312	0.0168475	1.24767	3.62274	3.38511	0.871667	1.24281	0.89808	150.236	0	Inactive	-1	-1	-1
960	CHEMBL3581836	2.01477	18	1	0.02857	0	0.0240302	-0.0674558	1.53817	3.85419	3.68178	0.761176	0.907498	1.10618	152.013	0	Inactive	-1	-1	-1
961	CHEMBL1923917	1.93823	22	0	0	0	0.0184875	0.0188182	1.52276	3.88874	3.75882	0.751502	1.00966	1.30269	153.274	0	Inactive	-1	-1	-1
962	CHEMBL274303	1.93498	12	0	0.14706	0	0.0406211	-0.0868089	1.74681	2.97552	2.92738	0.686389	0.797572	0.89011	139.901	0	Inactive	-1	-1	-1
963	CHEMBL3344522	1.97378	11	0	0	0	0.0280568	0.00945969	1.28521	3.6734	3.3442	0.948487	1.06753	0.78601	149.794	0	Inactive	-1	-1	-1
964	CHEMBL139973	2.05338	8	2	0.025	0	0.0269465	-0.0299977	1.42711	3.47877	3.3645	0.849385	0.935293	0.81749	155.505	0	Inactive	-1	-1	-1
965	CHEMBL1289773	1.97644	13	1	0.02632	2.37937	0.0265195	-0.137309	1.14631	3.87312	3.60988	0.824729	0.98451	1.07637	156.165	0.0707107	Inactive	-1	-1	-1
966	CHEMBL192627	1.77019	5	4	0.02632	3.53953	0.0322643	-0.0866444	1.32735	3.39196	3.15253	0.690211	1.11587	0.55111	151.874	0	Inactive	-1	-1	-1
967	CHEMBL2338061	1.90154	14	2	0.1	0	0.0225585	0.0859891	1.86591	3.79531	3.23196	0.613564	0.836089	1.10662	145.667	0	Inactive	-1	-1	-1
968	CHEMBL67457	2.0097	6	4	0	3.51498	0.0264301	-0.0687024	1.20816	3.64936	3.45146	0.870543	0.827674	0.76326	154.924	0.0429923	Inactive	-1	-1	-1
969	CHEMBL485279	2.00035	11	1	0.04	0	0.019048	0.0273979	1.33545	3.624	3.28515	0.672183	0.931325	1.15227	145.777	0	Inactive	-1	-1	-1
970	CHEMBL1079635	1.8231	5	1	0.02174	1.20228	0.0283255	-0.0383027	1.08923	3.60729	3.30172	0.892206	1.01797	0.83668	158.201	0.0456435	Inactive	-1	-1	-1
971	CHEMBL496027	1.85579	6	0	0.05882	0	0.0277555	-0.189453	1.00283	3.54476	3.1556	0.996483	1.02483	0.67482	162.329	0	Inactive	-1	-1	-1
972	CHEMBL2094559	1.8877	6	2	0	1.4517	0.034063	0.0785793	1.0271	3.63613	3.15445	0.986698	0.972686	0.56443	161.481	0	Inactive	-1	-1	-1
973	CHEMBL459254	1.72834	0	1	0	0	0.0328643	0.102516	1.04788	3.68729	3.45988	0.889378	1.36051	0.73928	161.4	0	Inactive	-1	-1	-1
974	CHEMBL1077553	1.97494	15	2	0	0	0.0333701	-0.0503374	1.30858	3.88231	3.74437	0.958528	0.936626	1.00523	155.271	0.00849986	Inactive	-1	-1	-1
975	CHEMBL2408997	1.94857	11	2	0	0	0.0257575	-0.0104984	1.29356	3.89201	3.69175	0.89888	0.945899	0.99029	155.012	0	Inactive	-1	-1	-1
976	CHEMBL1094089	1.93964	9	1	0.04	0.5	0.0188234	-0.221881	1.19591	3.45475	3.37092	0.418709	0.846874	1.10597	148.299	0.0431141	Inactive	-1	-1	-1
977	CHEMBL121177	1.9411	16	1	0.03846	0	0.027915	-0.0629135	1.2731	3.84006	3.49682	1.01915	1.14183	1.00181	149.841	0	Inactive	-1	-1	-1
978	CHEMBL3770139	1.96395	7	1	0.03846	1.65216	0.0293557	-0.116164	1.13291	3.65596	3.4348	0.869347	0.977144	0.80053	158.768	0.0395285	Inactive	-1	-1	-1
979	CHEMBL1796568	1.92072	14	4	0.03571	0	0.0234964	-0.0808169	1.40883	3.8445	3.46968	0.889378	1.05186	0.94546	150.007	0	Inactive	-1	-1	-1
980	CHEMBL727	1.96477	7	0	0.05882	0	0.0194598	-0.226183	1.18221	3.39047	3.0168	0.720173	0.962112	0.98607	151.736	0	Inactive	-1	-1	-1
981	CHEMBL2381931	1.87155	5	1	0	0	0.0174248	-0.114965	1.35727	3.54191	3.35287	0.62895	0.67578	1.08693	161.986	0	Inactive	-1	-1	-1
982	CHEMBL3426261	1.63381	1	2	0	0	0.0225364	-0.0425268	1.14533	3.68205	3.31935	0.967618	1.17393	0.94166	163.279	0	Inactive	-1	-1	-1
983	CHEMBL3827030	2.0321	10	1	0.05	0	0.0230799	-0.198898	1.30338	3.42431	3.21595	0.819816	0.914769	0.95054	149.133	0	Inactive	-1	-1	-1
984	CHEMBL198661	1.77922	0	0	0	0	0.072651	-0.0265891	1.30445	3.66164	3.56193	0.800687	0.901535	0.55531	160.283	0	Inactive	-1	-1	-1
985	CHEMBL1215733	2.01318	11	0	0.08696	1.60909	0.0284126	0.00909527	1.6732	3.57087	3.28677	0.6827	0.747742	1.13291	157.076	0.0118607	Inactive	-1	-1	-1
986	CHEMBL158327	1.83075	7	1	0.02174	0	0.0337483	-0.326062	1.12899	3.50045	3.27015	0.581564	0.790626	0.80793	150.504	0	Inactive	-1	-1	-1
987	CHEMBL117926	1.99026	11	4	0.04348	0	0.0187713	-0.206774	1.18276	3.37709	3.24356	0.757135	0.535214	1.03192	156.222	0	Inactive	-1	-1	-1
988	CHEMBL594329	1.93093	12	2	0.01852	1.68332	0.0188362	0.028543	1.35834	3.58816	3.3966	0.582669	0.870369	1.15134	157.545	0.00449958	Inactive	-1	-1	-1
989	CHEMBL570543	1.95271	5	2	0	0	0.0680282	0.159443	1.35887	3.43842	3.01723	0.745658	0.940939	0.63155	154.966	0	Inactive	-1	-1	-1
990	CHEMBL1949682	1.83754	6	1	0.05556	0	0.030363	-0.256071	1.43147	3.37347	3.11083	0.883312	0.988407	0.89904	154.963	0	Inactive	-1	-1	-1
991	CHEMBL389893	1.81169	6	1	0.02273	1.57781	0.0299041	-0.0267112	1.5253	3.43774	3.31414	0.864158	1.0574	0.91901	159.457	0.00449958	Inactive	-1	-1	-1
992	CHEMBL1214163	2.10288	3	2	0	7.43452	0.0418215	-0.0979359	1.07794	3.73554	3.57977	0.791842	0.953711	0.61798	152.637	0.237269	Inactive	-1	-1	-1
993	CHEMBL1210211	1.90179	5	0	0.04167	0	0.0295522	-0.148994	0.91161	3.29864	2.77182	0.87333	1.16433	0.70326	155.4	0	Inactive	-1	-1	-1
994	CHEMBL1774686	1.92283	10	1	0.09524	0	0.0224533	-0.101223	1.15499	3.45473	3.03978	0.749538	1.19174	0.97755	145.997	0	Inactive	-1	-1	-1
995	CHEMBL2261404	2.14644	17	0	0.05556	0	0.0216273	-0.0193621	1.48209	3.81504	3.45998	0.836644	0.703622	1.08849	155.606	0	Inactive	-1	-1	-1
996	CHEMBL2071297	1.94109	13	2	0.025	0	0.0194799	-0.00543861	1.43353	3.49082	3.0562	0.761941	0.921926	1.00561	147.646	0	Inactive	-1	-1	-1
997	CHEMBL3426254	1.88025	0	0	0	1.44927	0.0598988	0.0104016	1.05167	3.66068	3.39622	1.02089	1.3112	0.50498	157.119	0.0456435	Inactive	-1	-1	-1
998	CHEMBL375535	1.88401	12	0	0.02632	0	0.0350111	0.178974	2.07653	3.516	2.97859	0.685643	0.99546	0.83461	145.439	0	Inactive	-1	-1	-1
999	CHEMBL1770936	1.79819	5	1	0	0	0.0296466	-0.274843	1.13447	3.27726	3.124	0.910099	0.866251	0.66782	162.935	0	Inactive	-1	-1	-1
1000	CHEMBL393088	1.91607	16	0	0.02439	0	0.0349311	-0.0540353	1.18565	3.84774	3.76924	0.811839	0.902475	0.90384	155.096	0	Inactive	-1	-1	-1
1001	CHEMBL349609	2.00504	11	3	0.08696	0	0.019049	-0.179895	1.15534	3.33367	3.26698	0.72389	0.567467	1.10416	156.586	0	Inactive	-1	-1	-1
1002	CHEMBL1929340	1.9197	12	0	0.025	0	0.0263986	-0.073795	1.71558	3.48935	3.19866	0.571608	0.791069	0.96577	142.488	0	Inactive	-1	-1	-1
1003	CHEMBL1807201	1.95853	6	0	0.03846	1.44904	0.0220905	0.110588	1.14262	3.6012	3.36383	0.718874	1.09662	0.97186	151.495	0	Inactive	-1	-1	-1
1004	CHEMBL336448	2.03989	13	0	0.02381	0	0.0242567	-0.0648612	1.61267	3.57281	3.2824	0.667691	0.979384	1.01761	145.265	0	Inactive	-1	-1	-1
1005	CHEMBL42751	2.10134	8	4	0.08333	0	0.0195551	-0.107932	1.19596	3.37159	3.29553	0.737244	0.536701	1.04715	156.831	0	Inactive	-1	-1	-1
1006	CHEMBL487442	1.84017	6	2	0.03846	0	0.0298879	-0.0188023	1.19455	3.63622	3.40648	0.903737	1.18503	0.87394	153.107	0	Inactive	-1	-1	-1
1007	CHEMBL50894	1.90267	6	1	0.1	0	0.0306587	0.209413	1.54039	3.501	3.08374	0.623395	1.10434	0.80795	153.424	0	Inactive	-1	-1	-1
1008	CHEMBL1774622	1.85342	5	0	0	0	0.0450083	-0.0216342	1.43782	3.07517	2.83075	1.0754	1.16987	0.59275	151.91	0	Inactive	-1	-1	-1
1009	CHEMBL272259	1.92774	8	0	0	0	0.0211532	-0.170259	0.871671	3.10977	2.81983	0.666442	1.00125	0.8826	143.582	0	Inactive	-1	-1	-1
1010	CHEMBL466581	1.98127	8	2	0.05882	0	0.0247691	-0.0957439	1.26606	3.43662	3.15539	0.889654	0.887046	0.87645	153.446	0	Inactive	-1	1	-1
1011	CHEMBL138710	1.91518	12	1	0.02273	2.02213	0.0240286	-0.227903	1.32939	3.51593	3.26741	0.702004	0.883446	1.02623	156.463	0.00449958	Inactive	-1	-1	-1
1012	CHEMBL3120830	1.85	5	1	0	0	0.0340561	0.0283491	1.16598	3.72273	3.37844	1.04079	0.976997	0.88229	159.385	0	Inactive	-1	-1	-1
1013	CHEMBL453261	2.04789	13	0	0.04348	0	0.0283401	0.00625391	1.7512	3.60488	3.32766	0.559515	0.742614	0.97851	143.794	0	Inactive	-1	-1	-1
1014	CHEMBL582180	1.88358	8	4	0	0	0.0223542	-0.0526732	1.33025	3.56315	3.40593	0.941114	1.00267	0.84799	153.386	0	Inactive	-1	-1	-1
1015	CHEMBL2338380	1.89989	10	1	0	0	0.0299416	-0.0486221	1.19682	3.77597	3.58218	0.9566	1.08185	0.99412	156.526	0	Inactive	-1	-1	-1
1016	CHEMBL2022210	2.01482	18	1	0.03125	0	0.029286	-0.104797	1.66059	3.84532	3.54032	0.886616	0.95181	1.25531	143.84	0	Inactive	-1	-1	-1
1017	CHEMBL2408991	1.7734	0	1	0	0	0.0317731	-2.79e-05	1.10581	3.43493	3.00862	0.885393	1.16827	0.48713	154.677	0	Inactive	-1	-1	-1
1018	CHEMBL500482	2.02119	12	1	0.04348	0	0.0396544	-0.132226	1.5065	3.78393	3.22153	1.01974	0.902385	0.92563	147.306	0	Inactive	-1	-1	-1
1019	CHEMBL2022214	1.93489	16	0	0.02778	0	0.026207	0.119191	1.34553	3.80153	3.67569	0.778012	0.837343	1.19594	155.995	0	Inactive	-1	-1	-1
1020	CHEMBL2169986	1.9481	9	2	0.04545	0	0.0256353	-0.219221	1.2051	3.80171	3.51899	0.880082	0.825709	1.0235	159.071	0	Inactive	-1	1	-1
1021	CHEMBL137916	1.98058	12	0	0.06	0	0.0268718	0.0782754	1.41214	3.75321	3.42458	0.742046	0.915553	0.91937	151.966	0	Inactive	-1	1	-1
1022	CHEMBL609056	2.19164	16	0	0.01613	0	0.0226732	-0.163259	1.51781	3.81554	3.70882	0.842109	0.869558	1.18826	146.427	0	Inactive	-1	-1	-1
1023	CHEMBL514770	1.90286	12	0	0.15789	0	0.0737233	-0.0452886	2.66902	2.96867	2.94058	0.61594	0.631305	0.77466	138.292	0	Inactive	-1	-1	-1
1024	CHEMBL592303	2.02268	16	2	0.04167	0	0.0230162	-0.234765	1.26195	3.57678	3.31004	0.866616	0.837607	1.05133	149.766	0	Inactive	-1	-1	-1
1025	CHEMBL522958	1.88133	8	0	0.02632	0	0.027171	-0.115026	1.51717	3.49798	3.1591	0.851989	1.08612	0.93585	151.072	0	Inactive	-1	-1	-1
1026	CHEMBL595266	1.90639	12	3	0.06818	0	0.0228218	-0.219782	1.18395	3.45819	3.19355	0.884065	0.737615	1.03106	155.503	0	Inactive	-1	-1	-1
1027	CHEMBL219568	1.98605	7	0	0.05882	0	0.0255586	-0.223394	1.48142	3.39283	2.99246	0.562541	0.678297	0.90961	150.781	0	Inactive	-1	-1	-1
1028	CHEMBL131687	1.87724	11	2	0	0	0.0367846	0.0731482	1.15788	3.70249	3.5618	1.06332	1.15667	0.67187	153.824	0	Inactive	-1	-1	-1
1029	CHEMBL2338362	1.90259	5	2	0.02273	0	0.0579391	0.00254824	1.32384	3.5645	3.33508	0.74968	1.02055	0.79064	157.54	0	Inactive	-1	-1	-1
1030	CHEMBL1761206	1.99525	5	0	0.02857	3.83263	0.037357	0.106877	1.45498	3.82193	3.71436	0.60001	0.804486	0.8791	158.962	0	Inactive	-1	-1	-1
1031	CHEMBL1213866	1.9756	9	1	0.04167	1.60094	0.024633	-0.0411345	1.17383	3.58705	3.39441	0.764219	0.86699	0.94015	153.079	0.0833333	Inactive	-1	-1	-1
1032	CHEMBL2377314	1.94031	7	0	0.02	0	0.0232913	-0.0155167	1.41555	3.78646	3.40545	0.84723	0.769062	1.02178	160.697	0	Inactive	-1	-1	-1
1033	CHEMBL2408800	1.90763	9	1	0.01163	0	0.0349179	0.0600623	1.06483	3.87478	3.71372	0.938005	1.1259	0.93012	156.129	0	Inactive	-1	-1	-1
1034	CHEMBL2088684	1.97726	6	1	0.05882	0	0.0190066	-0.175617	1.20909	3.39403	3.12504	0.644334	0.773688	0.91278	161.277	0	Inactive	-1	-1	-1
1035	CHEMBL1796410	1.96896	11	0	0.02381	0	0.0224709	0.193438	1.35677	3.64225	3.37873	0.820652	0.99253	0.85493	154.315	0	Inactive	-1	-1	-1
1036	CHEMBL822	2.10196	9	1	0	0	0.0324798	-0.0440599	1.11526	3.81908	3.50172	0.955849	0.859255	0.87117	154.371	0	Inactive	-1	-1	-1
1037	CHEMBL2316665	1.8922	10	0	0.02941	0	0.0239117	-0.071674	1.40104	3.43478	2.9495	0.862512	1.07276	0.94584	147.288	0	Inactive	-1	-1	-1
1038	CHEMBL270581	2.05084	11	1	0.05	0	0.0325744	-0.0329038	1.2114	3.79014	3.45022	0.867002	1.01913	0.88699	149.899	0	Inactive	-1	-1	-1
1039	CHEMBL468990	1.91315	14	2	0.01316	0	0.031615	-0.0957019	1.23579	3.87953	3.7439	0.975049	0.973724	0.99584	155.051	0	Inactive	-1	-1	-1
1040	CHEMBL1761035	1.8634	5	1	0.05	0	0.0224362	-0.0547288	1.1314	3.53907	3.06454	0.978618	1.36043	1.03245	160.576	0.0064582	Inactive	-1	-1	-1
1041	CHEMBL2409003	1.84566	7	0	0.05882	0	0.0186846	-0.144402	1.4107	3.39973	3.07628	0.903894	1.0043	0.91641	160.13	0	Inactive	-1	-1	-1
1042	CHEMBL2024106	1.97429	13	0	0	0	0.025981	-0.0390545	1.31659	3.70845	3.20173	0.978899	1.13305	0.9014	148.246	0	Inactive	-1	-1	-1
1043	CHEMBL385783	1.87877	11	1	0.02273	0	0.0240619	0.0961443	1.54592	3.74162	3.19733	0.717812	0.876383	0.89254	154.332	0	Inactive	-1	-1	-1
1044	CHEMBL1089377	1.99035	12	2	0	0	0.0215599	-0.132924	1.41776	3.89136	3.67012	0.83664	0.855493	1.18373	153.1	0	Inactive	-1	-1	-1
1045	CHEMBL1760508	1.91453	8	4	0	0	0.0217375	-0.161607	1.28993	3.48241	3.27842	0.886321	1.02186	0.84388	150.156	0	Inactive	-1	-1	-1
1046	CHEMBL2402091	1.80797	6	2	0.03571	0	0.0220468	-0.125571	0.932505	3.34638	2.85026	0.878175	1.12538	0.76529	157.49	0	Inactive	-1	-1	-1
1047	CHEMBL19215	2.05717	13	0	0	0	0.0323371	-0.139967	1.24418	3.85262	3.61831	0.977114	0.957661	0.87681	151.765	0	Inactive	-1	-1	-1
1048	CHEMBL3326154	2.11463	8	2	0.01563	7.42966	0.0406392	-0.193882	1.10456	3.80053	3.60091	0.856488	0.980224	0.73839	151.147	0.195602	Inactive	-1	-1	-1
1049	CHEMBL3120835	1.90256	10	0	0.02174	0	0.0285995	-0.0845811	1.19607	3.67333	3.29681	0.885025	1.15296	0.98468	151.396	0	Inactive	-1	-1	-1
1050	CHEMBL1081114	2.07784	6	0	0	0	0.0248971	-0.253366	1.15035	3.46726	3.24997	0.765278	0.783625	0.82473	149.246	0	Inactive	-1	-1	-1
1051	CHEMBL520404	2.08886	13	1	0.07813	0	0.0184673	-0.0757304	1.32753	3.73837	3.37667	0.544007	0.788925	1.37139	145.976	0	Inactive	-1	-1	-1
1052	CHEMBL138506	1.93966	12	2	0.04545	0	0.0238899	-0.264936	1.26972	3.48561	3.21492	0.869953	0.794873	1.04381	149.613	0	Inactive	-1	-1	-1
1053	CHEMBL1171972	1.98016	8	0	0	0	0.029254	-0.094542	1.14224	3.46221	3.02842	0.898012	0.975659	0.66694	153.729	0	Inactive	-1	-1	-1
1054	CHEMBL7568	2.03174	9	0	0.02273	0	0.0315183	-0.0755812	1.5385	3.51721	3.39876	0.978383	1.09558	0.87441	148.545	0	Inactive	-1	-1	-1
1055	CHEMBL83668	1.94654	3	0	0	0	0.0511544	-0.0599573	1.26424	3.53736	3.16341	0.77673	0.969983	0.61088	157.794	0	Inactive	-1	-1	-1
1056	CHEMBL1096202	1.90456	12	0	0.04	2.02022	0.0224013	-0.0125658	1.2328	3.54989	3.41402	0.611024	1.01605	1.12916	155.844	0.00449958	Inactive	-1	-1	-1
1057	CHEMBL1213853	1.94015	10	2	0.04545	0	0.0235567	-0.235267	1.27402	3.80883	3.50398	0.843151	0.798731	1.08272	158.29	0	Inactive	-1	1	-1
1058	CHEMBL3120831	1.97415	5	2	0	1.4517	0.0414096	0.0886671	1.00793	3.63705	3.18539	1.0026	1.03873	0.50078	157.256	0	Inactive	-1	-1	-1
1059	CHEMBL404184	1.84428	2	0	0	0	0.050352	-0.00580655	1.1412	3.42406	3.1972	0.677912	0.966852	0.43662	158.915	0	Inactive	-1	-1	-1
1060	CHEMBL1172120	1.99134	11	0	0.02632	0	0.0247835	-0.131089	1.76387	3.44067	3.1198	0.523443	0.527106	0.86374	146.714	0	Inactive	-1	-1	-1
1061	CHEMBL1783992	2.01834	12	1	0	0	0.0283794	-0.0297575	1.31225	3.80919	3.53549	0.992147	1.00889	0.92395	151.483	0	Inactive	-1	-1	-1
1062	CHEMBL457111	1.9085	12	0	0	0	0.0222478	-0.0983757	1.49964	3.48309	3.19153	0.810722	1.03883	0.98718	143.277	0	Inactive	-1	-1	-1
1063	CHEMBL3353666	1.9292	5	3	0.01613	0	0.0284715	0.0430301	1.41088	3.78917	3.59126	0.956963	0.952398	0.89416	159.891	0	Inactive	-1	-1	-1
1064	CHEMBL327032	1.99698	6	0	0.11111	0	0.0256219	-0.223494	1.21024	3.36362	3.08068	0.522912	0.704866	0.92624	153.964	0	Inactive	-1	1	-1
1065	CHEMBL1097154	2.04663	12	0	0.04167	0	0.02871	0.0557315	1.5864	3.6394	3.37507	0.543381	0.701905	0.97711	145.267	0	Inactive	-1	-1	-1
1066	CHEMBL563145	1.9846	13	2	0.04167	0	0.0244928	-0.0918955	1.7505	3.5237	3.35777	0.520212	0.688526	0.8458	146.503	0	Inactive	-1	-1	-1
1067	CHEMBL1614912	2.10898	3	2	0.02	5.85747	0.0391395	-0.0330478	0.994112	3.71353	3.41618	0.956271	0.95105	0.43974	152.169	0.137716	Inactive	-1	-1	-1
1068	CHEMBL1214740	1.96644	15	2	0.06	0	0.0242491	-0.123923	1.34823	3.59925	3.41681	0.90009	0.977031	1.05156	149.291	0	Inactive	-1	-1	-1
1069	CHEMBL377233	2.01628	14	0	0.04348	0	0.0346837	-0.160021	1.48878	3.6653	3.12234	0.666823	0.851279	0.84563	144.037	0	Inactive	-1	-1	-1
1070	CHEMBL45627	2.04387	6	0	0	0	0.0216375	-0.111777	1.06199	3.57803	2.83694	0.975463	0.830552	0.91449	157.397	0	Inactive	-1	-1	-1
1071	CHEMBL1774602	1.90366	12	1	0.04	0	0.0293868	-0.0209136	1.29116	3.76197	3.4506	0.961829	0.957798	0.9104	152.422	0	Inactive	-1	-1	-1
1072	CHEMBL329629	1.92964	3	2	0	1.94197	0.0212281	0.0429511	0.841712	3.46292	3.14792	0.472499	0.908481	0.67838	153.5	0.205066	Inactive	-1	-1	-1
1073	CHEMBL131921	1.95692	9	2	0.06818	0	0.0271782	-0.240973	1.12035	3.36654	3.27736	0.821956	0.881064	0.96825	151.654	0	Inactive	-1	-1	-1
1074	CHEMBL288561	2.00025	7	3	0	3.51498	0.0254209	-0.170445	1.06793	3.51178	3.22801	0.875775	0.746099	0.77196	154.401	0.0383804	Inactive	-1	-1	-1
1075	CHEMBL149118	2.03416	9	0	0	0	0.0228296	-0.160437	1.20591	3.3744	2.95981	0.80008	1.0861	0.93697	147.385	0	Inactive	-1	-1	-1
1076	CHEMBL1668042	1.93642	13	2	0.04167	0	0.0189165	0.0234966	1.3876	3.5715	3.3785	0.669944	0.936367	1.09061	151.157	0	Inactive	-1	-1	-1
1077	CHEMBL606136	1.90655	5	0	0.0303	1.91709	0.0326302	0.171728	1.49906	3.78084	3.67397	0.58851	0.728754	0.90757	160.953	0	Inactive	-1	-1	-1
1078	CHEMBL459421	2.00841	7	3	0	3.1994	0.0279223	-0.195741	1.10106	3.53638	3.20793	0.85068	0.75472	0.87177	152.682	0.0426824	Inactive	-1	-1	-1
1079	CHEMBL15365	1.89656	6	0	0	0	0.0312817	0.009299	1.27331	3.43786	3.07234	0.96136	1.11766	0.68498	151.457	0	Inactive	-1	-1	-1
1080	CHEMBL2391952	1.87598	5	1	0.02174	0	0.0355113	-0.149525	1.08543	3.70996	3.38198	1.06715	0.92189	0.76093	164.343	0	Inactive	-1	-1	-1
1081	CHEMBL1782109	2.08113	10	0	0.02273	0	0.0213754	-0.201011	1.32988	3.53741	3.353	0.731459	0.777443	1.01581	156.449	0	Inactive	-1	-1	-1
1082	CHEMBL594623	1.95102	10	2	0.04688	0	0.024524	-0.20733	1.36248	3.86735	3.68359	0.898298	0.91545	1.10962	155.817	0	Inactive	-1	-1	-1
1083	CHEMBL595763	1.92445	10	0	0.02857	0	0.0317219	0.0129664	1.4998	3.8568	3.71465	0.619345	0.774729	1.04589	158.394	0	Inactive	-1	-1	-1
1084	CHEMBL3290610	1.95791	21	0	0.02703	0	0.0258232	-0.00303361	1.47875	3.89895	3.78835	0.831189	1.03159	1.23225	146.55	0	Inactive	-1	-1	-1
1085	CHEMBL117831	1.95928	4	3	0	1.62009	0.0297724	-0.0861441	1.21908	3.52614	3.33405	0.73997	0.801712	0.69579	153.188	0.0733697	Inactive	-1	-1	-1
1086	CHEMBL1770815	1.67641	1	1	0.02381	0	0.0183081	0.0588032	1.03563	3.49028	3.17498	0.874113	0.907589	0.88413	165.876	0	Inactive	-1	-1	-1
1087	CHEMBL1950996	1.98532	13	0	0.01563	0	0.0241449	0.0140716	1.33405	3.83701	3.62731	0.906078	1.02977	1.12528	152.907	0.00849986	Inactive	-1	-1	-1
1088	CHEMBL600161	1.95848	13	1	0.04348	0	0.0308694	-0.233862	1.47939	3.54991	3.18396	0.998768	0.991314	0.99053	144.541	0	Inactive	-1	-1	-1
1089	CHEMBL562637	1.89709	11	2	0	0	0.0260634	0.0369282	1.48666	3.75913	3.45379	0.865201	0.948187	1.01772	151.618	0	Inactive	-1	-1	-1
1090	CHEMBL609013	1.98554	15	0	0.01389	0	0.0356381	-0.0389921	1.31344	3.88084	3.73248	0.945504	0.991657	1.01974	154.984	0.00849986	Inactive	-1	-1	-1
1091	CHEMBL522887	2.04504	13	2	0.02778	0	0.02206	0.026945	1.33512	3.77156	3.74362	0.803791	1.04352	1.22757	146.73	0	Inactive	-1	-1	-1
1092	CHEMBL346085	1.99958	12	1	0.01613	0	0.0246816	-0.0892648	1.45379	3.74305	3.65444	0.736261	0.863704	1.01563	153.893	0	Inactive	-1	-1	-1
1093	CHEMBL2431518	1.93703	16	1	0.02778	0	0.0281014	-0.0252404	1.39083	3.80183	3.72948	0.782266	0.9049	1.16183	153.751	0	Inactive	-1	-1	-1
1094	CHEMBL1950987	1.94574	13	3	0.04	0	0.0192495	-0.0342169	1.3262	3.56912	3.37672	0.732452	0.837731	1.08663	152.453	0	Inactive	-1	-1	-1
1095	CHEMBL203662	1.86198	10	1	0	0	0.0353835	0.0406127	1.11371	3.62077	3.23547	1.19231	1.10192	0.74648	152.943	0	Inactive	-1	-1	-1
1096	CHEMBL3338915	2.02758	8	0	0.03448	0	0.023864	-0.0311452	1.31623	3.90099	3.62329	0.867678	0.929377	1.05825	156.967	0	Inactive	-1	-1	-1
1097	CHEMBL204745	1.75856	5	1	0	0	0.0430455	0.133956	1.02838	3.57516	3.15969	1.21074	1.23	0.51628	154.781	0	Inactive	-1	-1	-1
1098	CHEMBL1215531	1.93131	12	0	0.06522	0	0.0403402	-0.122324	1.80474	3.70378	3.16352	1.04851	1.18057	0.88785	147.36	0	Inactive	-1	-1	-1
1099	CHEMBL594179	2.0345	8	1	0.03333	0	0.0241669	-0.0835093	1.28667	3.89843	3.62761	0.919988	0.852026	1.05011	157.521	0	Inactive	-1	-1	-1
1100	CHEMBL373635	1.99165	7	0	0.04762	0	0.0293207	0.142166	1.3681	3.54025	3.35584	0.650412	0.718542	0.83044	159.42	0	Inactive	-1	-1	-1
1101	CHEMBL1923932	1.966	11	1	0.02083	1.38918	0.0203046	0.153501	2.0365	3.51522	3.3165	0.396457	0.784974	1.07292	149.166	0.0728931	Inactive	-1	-1	-1
1102	CHEMBL375099	2.17175	8	0	0.07895	0	0.0205566	-0.00159209	1.22522	3.7225	3.48064	0.572819	0.814598	1.31631	147.482	0	Inactive	-1	-1	-1
1103	CHEMBL522223	1.88495	12	1	0.05882	0	0.0233626	0.0756944	1.25376	3.49382	2.95161	0.871101	1.23842	0.91186	150.133	0	Inactive	-1	-1	-1
1104	CHEMBL1171636	2.02579	8	4	0.01852	0	0.0214788	-0.0725738	1.34178	3.52828	3.44714	0.736338	0.669208	1.03761	155.736	0	Inactive	-1	-1	-1
1105	CHEMBL52476	2.16056	0	0	0	18.3648	0.0486855	-0.147522	0.967158	3.73068	3.4849	0.975192	1.02963	0.25336	150.287	0.619562	Inactive	-1	-1	-1
1106	CHEMBL1592316	1.89727	17	1	0	0	0.027915	-0.014161	1.2758	3.86481	3.72624	0.907704	1.1822	1.23478	151.268	0	Inactive	-1	-1	-1
1107	CHEMBL52822	1.9075	9	2	0	0	0.0233516	-0.130251	1.18787	3.79627	3.55179	0.90706	1.01247	1.01623	152.89	0	Inactive	-1	-1	-1
1108	CHEMBL238441	2.00557	12	0	0.04	0	0.0227696	-0.0674154	1.67561	3.80285	3.40763	0.571458	0.74359	1.12095	148.342	0	Inactive	-1	-1	-1
1109	CHEMBL512200	1.90271	11	0	0.02778	0	0.0228969	-0.12973	1.44168	3.46764	3.08082	0.884293	1.07601	0.91851	146.309	0	Inactive	-1	-1	-1
1110	CHEMBL457050	1.93633	7	2	0	0	0.022056	-0.0349036	1.03399	3.47284	2.96706	0.662366	0.97874	0.69362	149.524	0	Inactive	-1	-1	-1
1111	CHEMBL1173514	2.13851	11	0	0.04545	0	0.0241	0.0739427	1.48573	3.58286	3.22576	0.615374	0.931558	1.10924	148.323	0	Inactive	-1	-1	-1
1112	CHEMBL1699130	1.98315	11	1	0.04348	0	0.0250888	-0.236377	1.18409	3.5471	3.33327	0.700408	0.829868	0.95395	155.32	0	Inactive	-1	-1	-1
1113	CHEMBL287889	1.89654	13	3	0.06818	0	0.0231534	-0.22949	1.40174	3.45381	3.20094	0.572549	0.631622	0.96995	149.222	0	Inactive	-1	-1	-1
1114	CHEMBL232274	2.10146	2	0	0	5.42619	0.0478199	-0.0786737	0.852459	3.48274	3.33592	0.954956	1.05248	0.31981	150.867	0.147856	Inactive	-1	-1	-1
1115	CHEMBL1917678	1.97102	12	2	0.04348	0	0.0261772	-0.187862	1.43967	3.63526	3.17318	0.745136	0.806116	0.94845	151.97	0	Inactive	-1	-1	-1
1116	CHEMBL2170943	2.12443	17	0	0.05556	0	0.0228083	-0.121049	1.76269	3.74886	3.60723	0.706983	0.906843	1.14944	145.479	0.00981479	Inactive	-1	-1	-1
1117	CHEMBL258357	1.91905	5	0	0.025	0	0.02904	-0.0783949	1.29206	3.59865	3.31738	0.886085	1.09558	0.91382	150.964	0	Inactive	-1	-1	-1
1118	CHEMBL497541	2.09261	9	0	0.025	1.76976	0.0271097	0.28405	1.44673	3.53096	3.15647	0.561454	0.746473	0.87128	148.043	0.013736	Inactive	-1	-1	-1
1119	CHEMBL1939610	1.93043	13	5	0.07692	0	0.0184149	-0.203171	1.3085	3.50805	3.17509	0.752025	0.659172	1.1181	154.962	0	Inactive	-1	-1	-1
1120	CHEMBL2402092	1.98109	11	3	0.04167	0	0.03069	-0.0951182	1.16424	3.71203	3.30526	0.965718	1.01317	0.80378	153.269	0	Inactive	-1	1	-1
1121	CHEMBL1289809	1.95812	10	5	0.125	0	0.020784	-0.223375	1.05671	3.49067	3.15966	0.790104	0.755662	1.10339	155.884	0	Inactive	-1	-1	-1
1122	CHEMBL1929346	1.9941	4	3	0	2.24958	0.0320397	-0.141144	1.08493	3.52377	3.20014	0.750743	0.756222	0.58445	153.912	0.0988724	Inactive	-1	-1	-1
1123	CHEMBL322320	1.92276	10	0	0	1.90611	0.0220211	-0.0907945	1.47734	3.47613	3.27129	0.625563	0.91571	1.01465	154.078	0.00449958	Inactive	-1	-1	-1
1124	CHEMBL1290773	1.94381	10	3	0.08696	0	0.0303894	-0.264406	1.13549	3.46948	3.23791	0.762921	0.748941	0.88684	154.158	0	Inactive	-1	-1	-1
1125	CHEMBL121196	1.89511	5	1	0	0	0.0354975	0.0139068	1.12635	3.55339	3.26768	1.03906	1.06931	0.77479	157.78	0	Inactive	-1	-1	-1
1126	CHEMBL1213094	2.06033	11	0	0.02381	1.53653	0.0219238	0.100008	1.97102	3.51079	3.17099	0.388445	0.738376	0.95637	147.743	0.0728931	Inactive	-1	-1	-1
1127	CHEMBL3353680	1.95571	7	0	0.02273	0	0.0208616	0.0515007	1.45373	3.82521	3.39311	0.907046	1.10409	0.92024	153.088	0	Inactive	-1	-1	-1
1128	CHEMBL156856	1.88135	6	0	0	0	0.0468076	-0.141966	1.02541	3.4709	3.07542	1.09638	1.13599	0.56097	155.561	0	Inactive	-1	-1	-1
1129	CHEMBL496028	2.01109	12	0	0.04	0	0.0335151	-0.137073	1.37601	3.73091	3.39679	0.564899	0.681741	0.84617	153.628	0	Inactive	-1	1	-1
1130	CHEMBL1215754	1.98677	10	1	0.05172	0	0.0298458	-0.108643	1.29045	3.64451	3.49157	0.768229	1.11484	1.10023	151.013	0.0111859	Inactive	-1	-1	-1
1131	CHEMBL1761029	1.93399	13	0	0.05556	0	0.0348043	-0.195719	1.67503	3.43598	2.96962	0.600727	0.772531	0.882	140.807	0	Inactive	-1	-1	-1
1132	CHEMBL247772	2.0039	12	1	0	0	0.0327559	-0.00153414	1.23064	3.75522	3.58152	0.958636	1.12492	1.04107	153.303	0.00981479	Inactive	-1	-1	-1
1133	CHEMBL1213810	1.844	5	1	0	0	0.0228265	-0.230343	1.09308	3.45566	3.23882	0.845697	1.0088	0.83953	155.282	0	Inactive	-1	-1	-1
1134	CHEMBL2314407	2.0705	8	0	0.02778	0	0.0204339	-0.125516	1.43987	3.42722	3.10621	0.641634	0.828518	0.99107	151.667	0	Inactive	-1	-1	-1
1135	CHEMBL430286	1.9242	8	1	0.02941	0	0.0211058	0.0836482	1.08967	3.46206	3.06822	0.590267	1.01546	0.88111	149.193	0	Inactive	-1	-1	-1
1136	CHEMBL113208	1.65831	1	0	0	0	0.0291945	0.0440805	1.00872	3.39447	2.89625	0.767442	1.2244	0.67394	159.071	0	Inactive	-1	-1	-1
1137	CHEMBL592981	1.9472	13	2	0.02174	0	0.0196421	0.0199485	1.39322	3.56733	3.37604	0.731069	0.934299	1.0473	149.832	0	Inactive	-1	-1	-1
1138	CHEMBL118915	2.0288	14	2	0.04167	0	0.0234205	-0.159584	1.23389	3.57371	3.26801	0.875848	0.803482	1.06201	149.877	0	Inactive	-1	-1	-1
1139	CHEMBL3785961	2.13074	2	2	0	4.47328	0.030722	-0.123592	1.0428	3.58047	3.49003	0.71944	1.01019	0.82552	151.523	0.392038	Inactive	-1	-1	-1
1140	CHEMBL2262111	1.94048	9	1	0.025	0	0.032697	-0.0429832	1.13343	3.53202	3.20661	1.04483	0.818206	0.81485	156.789	0	Inactive	-1	-1	-1
1141	CHEMBL148139	2.03918	8	0	0.01515	1.40567	0.0217397	-0.0319983	1.07755	3.61762	3.44809	0.612363	0.940255	1.22553	150.914	0.061831	Inactive	-1	-1	-1
1142	CHEMBL3354460	2.02473	16	1	0	6.21324	0.0257696	-0.0113357	1.35025	3.78211	3.75364	0.943395	1.07591	1.14472	150.256	0.03125	Inactive	-1	-1	-1
1143	CHEMBL1668531	1.83543	3	0	0.02174	0	0.0216936	0.000588	1.17148	3.54765	3.35142	0.751102	0.914482	0.95833	161.736	0	Inactive	-1	-1	-1
1144	CHEMBL3408760	1.82769	7	1	0	0	0.0363311	-0.145818	1.10115	3.66006	3.42944	0.870109	1.04231	0.72617	151.861	0	Inactive	-1	-1	-1
1145	CHEMBL593684	2.00199	11	0	0.025	0	0.0244038	-0.195704	1.47437	3.45283	3.12455	1.02038	0.925511	0.86858	147.926	0	Inactive	-1	-1	-1
1146	CHEMBL1290095	1.99781	14	4	0.07353	0	0.0193848	-0.103313	1.25228	3.77245	3.41309	0.724244	0.708441	1.29094	150.53	0	Inactive	-1	-1	-1
1147	CHEMBL3577193	2.05942	21	2	0.06579	0	0.0212174	-0.162397	1.40375	3.88748	3.7906	0.690462	0.88533	1.26625	151.235	0	Inactive	-1	-1	-1
1148	CHEMBL1673064	1.91547	6	2	0.02381	0.72427	0.0252947	-0.049046	1.56744	3.47847	3.25568	0.726189	0.943819	0.93941	152.236	0	Inactive	-1	-1	-1
1149	CHEMBL490805	2.03639	10	1	0.03448	0	0.0226989	-0.0133163	1.38158	3.77591	3.49421	0.758224	0.773275	0.99167	153.691	0	Inactive	-1	-1	-1
1150	CHEMBL70927	1.97833	4	3	0	2.3458	0.0325968	-0.0365632	1.24443	3.52474	3.31638	0.68075	0.708952	0.63739	153.229	0.0731925	Inactive	-1	-1	-1
1151	CHEMBL397156	1.85614	15	4	0	0	0.0355103	0.0523492	1.34681	3.86243	3.66755	1.1164	1.02367	0.9663	151.046	0	Inactive	-1	-1	-1
1152	CHEMBL1213809	2.00746	10	3	0.07407	0	0.0265156	-0.0877023	1.15269	3.64327	3.40837	0.828772	0.86982	0.90797	152.554	0	Inactive	-1	1	-1
1153	CHEMBL2316637	1.83412	4	0	0	0	0.0434245	-0.0487912	1.20049	3.74441	3.3011	1.0837	1.12432	0.56028	159.794	0	Inactive	-1	-1	-1
1154	CHEMBL2087241	1.94769	12	0	0	0	0.0319415	0.109489	1.58796	3.86796	3.63206	0.899239	0.922321	1.04374	151.247	0	Inactive	-1	-1	-1
1155	CHEMBL495687	2.12776	17	0	0.04545	0	0.0216083	-0.00450052	1.624	3.7349	3.22012	0.843048	1.04226	1.03703	144.981	0	Inactive	-1	-1	-1
1156	CHEMBL242393	1.95137	11	0	0.04167	0	0.0194444	0.00210403	1.72204	3.80991	3.32863	0.64622	0.953237	1.10492	149.418	0	Inactive	-1	-1	-1
1157	CHEMBL1780203	1.96548	11	1	0	0	0.0329505	0.00765156	1.29336	3.82445	3.75423	1.03733	1.07644	0.80222	151.427	0	Inactive	-1	-1	-1
1158	CHEMBL469648	1.82781	11	2	0.01923	0	0.0237979	-0.121021	1.20342	3.64928	3.44045	0.927812	1.07237	0.9135	155.585	0	Inactive	-1	-1	-1
1159	CHEMBL1796538	1.86212	6	0	0.08333	0	0.0279619	0.137026	1.16263	3.49568	3.09996	0.590423	0.865091	0.84516	159.433	0	Inactive	-1	1	-1
1160	CHEMBL3753756	1.89103	13	1	0.07143	0	0.0237174	-0.225663	1.23861	3.48481	3.29691	0.775675	1.0615	0.98962	150.331	0	Inactive	-1	-1	-1
1161	CHEMBL512419	1.80951	10	3	0.03448	0	0.0227757	-0.0689268	1.19871	3.772	3.36701	0.946694	1.18047	1.0147	151.407	0	Inactive	-1	-1	-1
1162	CHEMBL1796562	1.95567	11	2	0.03704	0	0.0236349	-0.0683862	1.22665	3.59108	3.48198	0.898078	1.02025	0.918	156.864	0	Inactive	-1	-1	-1
1163	CHEMBL249728	1.84259	7	1	0.075	0	0.0340654	0.0412276	1.87058	3.43436	3.04755	0.760744	0.949475	0.83256	149.679	0	Inactive	-1	-1	-1
1164	CHEMBL1213869	1.89996	16	4	0.06897	0	0.0258686	-0.218759	1.2109	3.68076	3.42058	0.894775	0.790217	1.07803	154.144	0	Inactive	-1	-1	-1
1165	CHEMBL559509	2.07729	12	0	0.01852	0	0.0208954	-0.123346	1.59602	3.80908	3.60461	0.755163	0.843588	1.26551	149.124	0.0141865	Inactive	-1	-1	-1
1166	CHEMBL593193	1.94758	7	1	0.025	0	0.031567	-0.160121	1.01177	3.53328	3.34164	1.06442	1.03237	0.65332	157.792	0	Inactive	-1	-1	-1
1167	CHEMBL1173138	2.08673	1	1	0	10.6781	0.0477422	-0.0832169	0.919451	3.67885	3.34444	0.955366	1.0469	0.4174	151.492	0.176335	Inactive	-1	-1	-1
1168	CHEMBL404136	1.9069	8	2	0.06667	0	0.0254755	-0.250765	1.08406	3.24593	3.09096	0.858887	0.776851	0.82578	156.05	0	Inactive	-1	-1	-1
1169	CHEMBL604078	2.14473	9	0	0.05263	0	0.0236242	-0.0846519	1.08063	3.40319	3.26572	0.757401	0.798488	0.9741	149.431	0	Inactive	-1	-1	-1
1170	CHEMBL3088353	1.93203	0	3	0	2.95313	0.0560294	0.011781	0.978	3.60444	3.45783	1.01528	1.25406	0.28737	156.42	0	Inactive	-1	-1	-1
1171	CHEMBL1807627	1.94631	9	0	0.04167	0	0.0215897	0.0237115	1.86409	3.77974	3.31871	0.825191	1.04835	1.09063	149.209	0	Inactive	-1	-1	-1
1172	CHEMBL203702	1.82173	8	1	0	0	0.0478977	0.00450718	1.14747	3.6377	3.30042	1.10248	1.02582	0.67989	152.795	0	Inactive	-1	-1	-1
1173	CHEMBL3581805	2.0112	18	1	0	0	0.0267141	-0.0545767	1.36811	3.85594	3.77785	0.990064	0.986277	1.04539	149.196	0	Inactive	-1	-1	-1
1174	CHEMBL519694	2.02058	14	0	0	0	0.0351361	-0.117041	1.18557	3.94393	3.7905	0.988034	0.997734	0.7707	150.694	0	Inactive	-1	-1	-1
1175	CHEMBL2431507	1.96693	13	2	0.02703	0	0.0234142	-0.0558311	1.29146	3.83896	3.65538	0.881107	0.961487	1.14722	155.94	0.00849986	Inactive	-1	-1	-1
1176	CHEMBL558510	1.83833	6	1	0.025	0	0.018484	0.0717579	1.32779	3.51911	3.24883	0.753026	1.07037	0.92312	157.264	0	Inactive	-1	-1	-1
1177	CHEMBL219416	1.77825	0	0	0	0	0.0696071	-0.0432651	1.30803	3.64593	3.51696	0.789138	0.87395	0.58212	160.953	0	Inactive	-1	-1	-1
1178	CHEMBL2087254	1.92284	15	1	0.01923	0	0.0268109	-0.0818065	1.3945	3.8431	3.4511	0.92021	1.11009	1.02009	147.084	0	Inactive	-1	-1	-1
1179	CHEMBL2088679	1.97633	7	0	0.04348	0	0.0514533	-0.0952041	1.15099	3.59489	3.41075	0.907428	0.984551	0.57219	154.988	0	Inactive	-1	1	-1
1180	CHEMBL55531	1.98145	10	2	0.04167	0	0.0232029	-0.230438	1.24955	3.50236	3.22464	0.711585	0.698111	0.95813	152.817	0	Inactive	-1	-1	-1
1181	CHEMBL375612	1.98896	14	0	0.04688	0	0.0248255	-0.18306	1.35388	3.9128	3.46886	0.561873	0.733058	1.11458	153.068	0	Inactive	-1	-1	-1
1182	CHEMBL151891	2.02502	14	2	0.09259	0	0.0243752	-0.20725	1.54289	3.60817	3.35498	0.583905	0.611872	1.10543	149.229	0	Inactive	-1	-1	-1
1183	CHEMBL2435707	1.95261	16	0	0.04286	0	0.0315765	-0.126972	1.36626	3.85501	3.58479	0.854959	1.01445	1.03084	153.52	0	Inactive	-1	-1	-1
1184	CHEMBL2391957	1.94195	12	0	0.02778	0	0.026834	-0.0407878	1.31901	3.45391	3.06989	0.834949	1.03631	0.92239	144.341	0	Inactive	-1	-1	-1
1185	CHEMBL24057	2.10055	8	0	0.04545	0	0.0329583	-0.0106768	1.2508	3.62263	3.29078	0.883329	1.10025	0.91445	147.248	0.0232221	Inactive	-1	-1	-1
1186	CHEMBL551728	2.03502	16	1	0.01852	0	0.0270407	-0.0332682	1.87249	3.72643	3.47097	0.744957	0.839738	0.89343	140.711	0	Inactive	-1	-1	-1
1187	CHEMBL600894	2.13124	17	0	0.03846	0	0.0221035	0.010919	1.49809	3.7349	3.70882	1.07346	1.19443	1.10906	147.728	0	Inactive	-1	-1	-1
1188	CHEMBL378006	1.9482	6	0	0.03448	1.52312	0.0242566	0.100457	1.12137	3.7482	3.43906	0.785197	1.05319	0.92856	153.256	0	Inactive	-1	-1	-1
1189	CHEMBL103	2.09194	2	3	0	7.20707	0.0435843	-0.174363	0.982139	3.77343	3.48805	0.958914	1.13056	0.4876	151.665	0.179558	Inactive	-1	-1	-1
1190	CHEMBL54344	1.98337	7	1	0.06522	0	0.0412107	0.093884	1.54921	3.56747	3.39461	0.531485	0.538225	0.58428	155.945	0	Inactive	-1	-1	-1
1191	CHEMBL1770934	1.90915	0	2	0	1.01633	0.0614923	0.0973451	0.868101	3.45088	2.98154	1.02967	1.13276	0.24573	161.624	0	Inactive	-1	-1	-1
1192	CHEMBL374279	2.04596	6	1	0.02	0.791185	0.0219021	0.153779	1.25958	3.59151	3.38897	0.723347	0.70832	0.96389	161.63	0.05	Inactive	-1	-1	-1
1193	CHEMBL28079	1.87535	5	0	0	0	0.0382233	-0.105567	1.09937	3.70871	3.36506	1.10773	1.00021	0.72011	163.294	0	Inactive	-1	-1	-1
1194	CHEMBL3088365	1.8596	12	2	0.1087	0	0.0257736	0.14154	1.64384	3.64491	3.26976	0.571719	0.875786	0.91707	149.041	0	Inactive	-1	-1	-1
1195	CHEMBL1089375	1.98457	10	0	0.0625	0	0.0308279	-0.128323	1.79588	3.78159	3.37788	0.548379	0.61953	1.00348	148.917	0	Inactive	-1	-1	-1
1196	CHEMBL2047182	1.99192	11	1	0	0	0.0243239	-0.102221	1.17975	3.44803	3.13933	0.851942	0.940724	0.96275	147.155	0	Inactive	-1	-1	-1
1197	CHEMBL444211	1.68242	0	1	0.02778	0.222222	0.030228	0.241158	1.36584	3.58772	3.17983	0.731814	1.05015	0.75527	160.584	0	Inactive	-1	-1	-1
1198	CHEMBL3218313	1.88592	5	1	0.02381	0	0.0340415	-0.0693995	1.52675	3.53475	3.16029	0.915444	1.04045	0.75231	152.233	0	Inactive	-1	-1	-1
1199	CHEMBL536508	1.88417	11	0	0.04	0	0.0266684	-0.00849685	1.4589	3.74018	3.34031	0.626982	0.755169	0.95982	155.621	0	Inactive	-1	-1	-1
1200	CHEMBL1213394	1.99361	11	0	0.01923	0	0.0237129	0.0103914	1.53891	3.77392	3.4012	0.690746	0.636072	0.94443	156.658	0	Inactive	-1	-1	-1
1201	CHEMBL1796435	1.85407	5	1	0.02273	0	0.0331714	-0.0240375	1.55377	3.76238	3.20465	0.957692	1.08909	0.72534	151.054	0	Inactive	-1	-1	-1
1202	CHEMBL562	2.06513	23	2	0.0625	0	0.0217708	-0.141096	1.39574	3.90329	3.79176	0.709527	0.910831	1.26569	150.837	0	Inactive	-1	-1	-1
1203	CHEMBL1673068	1.89078	11	1	0.09091	0	0.0193024	-0.0876589	1.19774	3.46769	3.07974	0.698348	1.17343	1.09169	145.072	0	Inactive	-1	-1	-1
1204	CHEMBL1917513	1.83736	5	0	0	1.3169	0.0336193	-0.0161857	1.06912	3.63212	3.33223	0.931572	1.14109	0.77599	156.262	0.0456435	Inactive	-1	-1	-1
1205	CHEMBL454221	2.08752	11	0	0.05556	0	0.0255595	-0.0520122	1.4073	3.47407	2.96551	0.726435	0.922737	1.04805	144.896	0.015861	Inactive	-1	-1	-1
1206	CHEMBL467775	1.93434	15	2	0.06452	0	0.0247158	-0.0768183	1.46019	3.86505	3.76037	0.923509	1.02507	1.10541	150.512	0	Inactive	-1	-1	-1
1207	CHEMBL2087243	2.0821	0	1	0	9.90438	0.0490305	-0.135521	0.856273	3.48952	3.31941	0.927674	1.02371	0.29101	151.076	0.187407	Inactive	-1	-1	-1
1208	CHEMBL2377313	1.94246	6	1	0	0	0.0329866	-0.141354	1.09843	3.68126	3.44359	0.937438	0.959546	0.73415	153.906	0	Inactive	-1	-1	-1
1209	CHEMBL333481	2.14102	9	1	0.02941	0	0.0208844	-0.0505212	1.09168	3.54753	3.08489	0.687237	0.806709	0.87399	152.264	0	Inactive	-1	-1	-1
1210	CHEMBL593653	1.92653	13	3	0.08696	0	0.029289	-0.2918	1.34225	3.45782	3.23405	0.590935	0.549089	0.97695	152.007	0	Inactive	-1	-1	-1
1211	CHEMBL1080591	1.97242	7	0	0.02381	1.52365	0.0283497	0.0547523	1.26618	3.57876	3.33109	0.80619	0.892995	0.86668	150.313	0.0833333	Inactive	-1	-1	-1
1212	CHEMBL294192	2.17207	9	0	0	0	0.0248814	0.0108709	1.25905	3.65175	3.29087	0.833749	0.739586	0.92478	148.187	0	Inactive	-1	-1	-1
1213	CHEMBL2089261	1.89199	10	1	0.02083	0	0.0303454	0.0439145	1.22243	3.68237	3.52111	0.942178	1.15646	0.75636	155.413	0	Inactive	-1	-1	-1
1214	CHEMBL104264	1.9288	12	0	0.025	0	0.0250942	0.00138916	1.16782	3.84634	3.64809	0.971475	0.979359	1.00844	159.413	0	Inactive	-1	-1	-1
1215	CHEMBL2381813	2.00306	10	1	0.02	0	0.0234471	-0.174821	1.2477	3.63087	3.39982	0.813455	0.911955	1.04737	152.447	0	Inactive	-1	-1	-1
1216	CHEMBL423192	2.01504	13	1	0.04545	0	0.0391787	-0.0644621	1.52928	3.78364	3.22147	1.07396	0.949908	0.9315	146.13	0	Inactive	-1	-1	-1
1217	CHEMBL597896	1.94429	12	1	0.02632	0	0.0275025	-0.190366	1.34062	3.47313	3.15039	0.888647	0.89663	0.91339	148.099	0	Inactive	-1	-1	-1
1218	CHEMBL550407	1.9934	9	0	0.02083	0	0.0316112	0.0261965	1.55115	3.78746	3.42269	1.02469	1.15713	0.82832	147.976	0	Inactive	-1	-1	-1
1219	CHEMBL538179	1.91692	6	0	0.03333	0	0.0360814	-0.139983	1.48108	3.22326	3.02435	0.965668	1.07912	0.64818	148.756	0	Inactive	-1	-1	-1
1220	CHEMBL136132	1.86114	5	2	0.02632	0	0.0317193	-0.0714192	1.04864	3.43251	3.21223	0.937245	1.07771	0.73073	156.297	0	Inactive	-1	-1	-1
1221	CHEMBL3577101	1.92297	10	1	0.06522	0	0.0253571	-0.12713	1.35821	3.79482	3.21821	0.888566	1.02844	0.97741	151.601	0	Inactive	-1	-1	-1
1222	CHEMBL164129	2.08299	11	3	0.04167	0	0.0191159	-0.0831815	1.52074	3.58925	3.40327	0.711897	0.841279	1.05474	150.422	0	Inactive	-1	-1	-1
1223	CHEMBL1782108	1.97878	6	0	0.03333	0	0.0202037	-0.155244	1.12855	3.3803	3.04038	0.662535	0.980972	0.88299	157.934	0	Inactive	-1	-1	-1
1224	CHEMBL130	1.75935	7	1	0.03846	0	0.0191556	-0.0113575	1.24867	3.75663	3.32592	0.94925	1.07467	0.99062	159.238	0	Inactive	-1	1	-1
1225	CHEMBL318782	1.99587	17	2	0.01429	0	0.0226638	-0.153627	1.43547	3.90029	3.70683	0.703385	0.847045	1.17743	149.826	0	Inactive	-1	-1	-1
1226	CHEMBL274031	1.94082	16	2	0.0625	0	0.024825	-0.147082	1.38708	3.86506	3.77203	0.87877	1.00647	1.10385	151.02	0	Inactive	-1	-1	-1
1227	CHEMBL572497	1.91873	10	0	0	0	0.0237976	-0.0678857	1.39326	3.85668	3.69119	0.949421	0.975674	1.06808	152.65	0	Inactive	-1	1	-1
1228	CHEMBL481837	1.79122	0	0	0	0	0.0379187	0.157219	1.06277	3.68764	3.49971	0.914043	1.33897	0.79128	160.476	0	Inactive	-1	-1	-1
1229	CHEMBL1812356	2.01239	18	3	0.05714	0	0.0239377	-0.119839	1.50317	3.86559	3.49363	0.613983	0.656536	1.23459	150.73	0	Inactive	-1	-1	-1
1230	CHEMBL1822429	1.97385	15	1	0.02564	0	0.0331529	-0.000638	1.22403	3.80912	3.73807	0.971034	1.00477	1.04138	156.671	0	Inactive	-1	-1	-1
1231	CHEMBL451869	2.00267	13	0	0	0	0.0216598	-0.11257	1.41499	3.46915	2.99258	0.838922	1.01909	0.89694	143.934	0	Inactive	-1	-1	-1
1232	CHEMBL3426262	1.94523	7	1	0.01613	0	0.0297641	-0.0283963	1.41626	3.8436	3.6482	0.613824	0.871821	1.08161	153.19	0.0196296	Inactive	-1	-1	-1
1233	CHEMBL1761014	1.92711	14	0	0	0	0.0225083	-0.0796789	1.3782	3.73875	3.27198	0.832025	0.963345	1.04876	149.34	0	Inactive	-1	-1	-1
1234	CHEMBL194650	1.76772	5	2	0.02273	1.76482	0.0301944	0.0994432	1.31893	3.58547	3.30757	0.764478	0.988706	0.79037	162.716	0.00449958	Inactive	-1	-1	-1
1235	CHEMBL1172808	1.8679	11	1	0	0	0.0295035	-0.00657086	1.21983	3.84969	3.65299	0.969794	1.13891	0.99611	153.34	0	Inactive	-1	-1	-1
1236	CHEMBL1076140	1.9789	13	2	0.04545	0	0.0246992	-0.184773	1.32522	3.50162	3.36643	0.955161	0.939466	0.98898	148.365	0	Inactive	-1	-1	-1
1237	CHEMBL369473	1.8231	4	0	0.03333	0	0.0307254	-0.0897643	1.24007	3.41316	2.92309	0.974863	1.05133	0.60866	155.403	0	Inactive	-1	-1	-1
1238	CHEMBL460703	1.95002	10	0	0.02632	0	0.0292234	0.00945705	1.37674	3.72566	3.13744	1.01973	1.06182	0.80587	152.551	0	Inactive	-1	-1	-1
1239	CHEMBL217931	1.90423	11	1	0.04348	1.23449	0.0211415	-0.177179	1.23525	3.5659	3.2742	0.692008	0.90697	1.02167	161.928	0.00301841	Inactive	-1	-1	-1
1240	CHEMBL1689601	2.07865	19	0	0.03448	0	0.0224392	-0.0597069	1.7006	3.83864	3.48497	0.662582	0.881858	1.17876	142.78	0	Inactive	-1	-1	-1
1241	CHEMBL3115705	2.02362	8	0	0.025	0	0.0225687	0.00733344	1.34864	3.51498	3.32935	0.686313	0.91627	0.89171	153.358	0	Inactive	-1	1	-1
1242	CHEMBL2435705	1.98892	12	0	0	0	0.0330314	0.0449603	1.46804	3.55922	3.43535	1.09915	1.16437	0.92476	143.708	0	Inactive	-1	-1	-1
1243	CHEMBL488896	2.05147	14	1	0.02174	0	0.0220374	0.0588808	1.28965	3.68922	3.44782	0.940676	1.00325	0.8842	152.409	0	Inactive	-1	-1	-1
1244	CHEMBL1928660	2.06276	12	3	0.0625	0	0.026994	-0.102203	1.37708	3.5983	3.20708	0.628045	0.638087	1.07993	152.742	0.0251933	Inactive	-1	-1	-1
1245	CHEMBL1091437	1.97854	12	1	0.06	0	0.0257651	-0.102519	1.41647	3.58412	3.39011	0.640148	0.84817	1.01924	149.914	0	Inactive	-1	-1	-1
1246	CHEMBL1172510	1.97171	18	2	0.05556	0	0.0226711	-0.142932	1.61145	3.7993	3.45992	0.578701	0.870803	1.06224	143.343	0	Inactive	-1	-1	-1
1247	CHEMBL3344525	1.8374	6	1	0	0	0.0324614	-0.028908	1.13142	3.65056	3.3704	0.934475	1.14985	0.81172	155.384	0	Inactive	-1	-1	-1
1248	CHEMBL21414	1.96368	10	0	0.04	0	0.0300012	-0.156235	1.74503	3.66289	3.47409	0.706222	0.883581	1.05554	150.026	0.00981479	Inactive	-1	-1	-1
1249	CHEMBL455616	1.8569	0	0	0	0	0.0856463	-0.0590271	1.14069	3.30252	2.98154	1.08127	1.41077	0.34198	154.299	0.0129164	Inactive	-1	-1	-1
1250	CHEMBL3127923	1.84941	14	3	0.03571	0	0.0225269	-0.0798157	1.24656	3.87209	3.80914	0.824334	0.979357	1.19397	155.962	0	Inactive	-1	-1	-1
1251	CHEMBL1213872	1.94585	10	0	0.04545	0	0.0228718	-0.0973832	1.38889	3.5289	3.30997	0.6412	0.967551	1.06943	146.467	0	Inactive	-1	-1	-1
1252	CHEMBL261295	1.97153	16	2	0.0122	0	0.0245682	-0.0200998	1.33318	3.91027	3.8113	0.863085	0.921151	1.14327	153.363	0	Inactive	-1	-1	-1
1253	CHEMBL71	2.16799	10	2	0.04545	0	0.0190841	-0.114385	1.3445	3.51052	3.24692	0.750848	0.624526	1.07805	148.732	0	Inactive	-1	1	-1
1254	CHEMBL1077560	1.96707	18	2	0	0	0.0178376	-0.0206051	1.48587	3.84209	3.62109	0.796512	0.876555	1.28385	156.461	0	Inactive	-1	-1	-1
1255	CHEMBL199543	1.98113	10	2	0.04167	2.33972	0.02752	-0.0062787	1.19597	3.70098	3.57287	0.832722	1.02467	0.93545	158.484	0.00389675	Inactive	-1	-1	-1
1256	CHEMBL369038	2.02306	13	0	0	0	0.0303946	0.0151545	1.35126	3.85269	3.68737	0.985835	1.1481	0.92418	150.997	0	Inactive	-1	-1	-1
1257	CHEMBL1928403	2.10872	3	1	0	4.47328	0.0298233	-0.165171	0.995929	3.58977	3.42551	0.704205	0.987099	0.82321	150.142	0.372444	Inactive	-1	-1	-1
1258	CHEMBL3815071	2.05969	13	0	0.05	0	0.023454	-0.0381155	1.62932	3.81194	3.63033	0.580743	0.740231	1.23972	151.519	0.0141865	Inactive	-1	-1	-1
1259	CHEMBL52831	2.1149	10	0	0	0	0.023018	-0.153971	1.21035	3.81834	3.50512	0.960394	0.856279	1.01811	151.91	0	Inactive	-1	-1	-1
1260	CHEMBL368165	2.01715	13	0	0.03846	0	0.023162	0.15868	1.56029	3.62496	3.48639	0.57749	0.722348	1.07504	148.679	0	Inactive	-1	-1	-1
1261	CHEMBL576477	1.95369	19	6	0.07895	0	0.0227692	-0.212752	1.29236	3.85822	3.50427	0.826355	0.723522	1.22369	154.131	0	Inactive	-1	-1	-1
1262	CHEMBL1946826	1.92647	9	0	0	0	0.0339361	0.0284715	1.34624	3.7756	3.57642	0.895037	0.731363	0.92702	160.925	0	Inactive	-1	-1	-1
1263	CHEMBL496538	1.91804	10	0	0.02381	1.70347	0.0276694	-0.0670079	1.15977	3.56779	3.2498	0.744557	1.07037	0.9178	157.729	0.00449958	Inactive	-1	-1	-1
1264	CHEMBL231063	1.95583	9	0	0	0	0.0336138	0.122478	1.12876	3.53812	3.35804	1.0866	0.880124	0.84286	155.517	0	Inactive	-1	-1	-1
1265	CHEMBL1822420	1.99221	15	0	0.02273	0	0.0269324	-0.125745	1.40222	3.74237	3.38895	0.737147	0.946839	1.00661	144.548	0	Inactive	-1	-1	-1
1266	CHEMBL1565950	1.81841	5	2	0.02273	0	0.029316	0.133678	1.23453	3.57618	3.33344	0.811686	1.01126	0.84199	156.966	0	Inactive	-1	-1	-1
1267	CHEMBL12014	1.95308	8	0	0	0	0.0224501	-0.191102	1.21323	3.32559	3.12429	0.813822	0.95215	0.79995	148.997	0	Inactive	-1	-1	-1
1268	CHEMBL1782105	2.02604	8	1	0	0	0.028706	-0.0144485	1.19796	3.57651	3.48605	0.987931	1.01808	0.83745	153.447	0	Inactive	-1	-1	-1
1269	CHEMBL597328	1.87447	9	0	0.01667	1.53626	0.0284164	0.110714	1.56705	3.83216	3.76169	0.938516	1.09345	1.03254	155.822	0.0645497	Inactive	-1	-1	-1
1270	CHEMBL3115464	1.89777	11	1	0.03846	0	0.0397342	-0.120175	1.19945	3.81526	3.41654	0.722957	0.904913	0.74308	153.003	0	Inactive	-1	-1	-1
1271	CHEMBL594374	2.11639	13	1	0	1.62741	0.0242783	-0.0566942	1.61345	3.71742	3.39423	0.752535	0.892585	0.77562	147.069	0.163663	Inactive	-1	-1	-1
1272	CHEMBL2012827	1.92976	18	1	0.02	0	0.0238455	-0.0673507	1.50672	3.82827	3.41844	0.9003	1.06751	1.00611	144.77	0	Inactive	-1	-1	-1
1273	CHEMBL1761030	1.94244	15	0	0.09091	0	0.0317267	-0.152878	1.72463	3.58107	3.16949	0.608682	0.766391	0.98316	141.176	0	Inactive	-1	-1	-1
1274	CHEMBL1950993	2.03472	9	0	0	0	0.0333128	-0.161745	1.20382	3.62211	3.17519	1.01929	0.993989	0.69887	149.73	0	Inactive	-1	-1	-1
1275	CHEMBL425763	1.86553	6	0	0.04	0	0.0229308	0.182213	1.3041	3.72053	3.53789	0.647476	0.929399	0.93377	155.614	0	Inactive	-1	1	-1
1276	CHEMBL564346	1.8957	6	1	0	0	0.0261356	-0.0724193	1.17996	3.66793	3.46227	0.766998	1.11369	1.02707	156.388	0	Inactive	-1	-1	-1
1277	CHEMBL1782107	1.99836	11	0	0.05263	0	0.0227088	-0.0970265	1.53375	3.48302	3.12092	0.620805	0.896324	0.94006	149.993	0	Inactive	-1	-1	-1
1278	CHEMBL18679	2.08595	6	0	0	3.17615	0.0265804	-0.0277231	0.937581	3.51328	3.34342	0.718888	0.92176	0.70715	149.178	0.136035	Inactive	-1	-1	-1
1279	CHEMBL374741	1.93624	12	3	0.06522	0	0.0250241	-0.178499	1.22001	3.48276	3.20065	0.856102	0.719641	1.00959	153.678	0	Inactive	-1	-1	-1
1280	CHEMBL2337378	1.86248	9	1	0.02273	0	0.031499	-0.113528	1.54997	3.74484	3.37617	0.728281	0.896071	0.8201	151.993	0	Inactive	-1	1	-1
1281	CHEMBL139460	1.94056	13	0	0.07895	0	0.0280837	-0.123233	1.61077	3.43999	2.9908	0.620794	0.869978	0.96985	141.649	0	Inactive	-1	-1	-1
1282	CHEMBL1807626	1.90403	10	0	0.02632	0	0.0307521	0.0237841	1.70703	3.62583	3.12515	0.87534	1.06507	0.90034	148.87	0	Inactive	-1	-1	-1
1283	CHEMBL450692	2.02476	16	1	0.03704	0	0.0259097	-0.11472	1.41198	3.83697	3.64242	0.763373	0.995666	1.01584	147.739	0	Inactive	-1	-1	-1
1284	CHEMBL90245	1.84425	8	0	0.025	0	0.0193995	-0.107614	1.32748	3.48542	3.23584	0.720663	1.21648	1.06335	152	0	Inactive	-1	-1	-1
1285	CHEMBL3104736	1.67628	0	1	0.02941	0.43679	0.0307034	0.311295	1.20783	3.53742	3.176	0.756027	1.04698	0.75327	161.353	0	Inactive	-1	-1	-1
1286	CHEMBL90753	2.14996	14	1	0.02083	0	0.0205191	0.0465498	1.33375	3.58277	3.5277	0.678585	0.973688	1.05553	147.242	0	Inactive	-1	-1	-1
1287	CHEMBL560680	1.91531	11	2	0.03571	0	0.0274258	-0.0132997	1.38827	3.75736	3.4199	0.868019	0.889348	1.06547	153.79	0	Inactive	-1	-1	-1
1288	CHEMBL139358	1.94577	12	2	0.05357	0	0.0318084	-0.0513711	1.27279	3.76616	3.46208	0.957333	0.919294	0.94333	154.243	0	Inactive	-1	-1	-1
1289	CHEMBL334308	1.81671	7	1	0.02	0	0.0412923	0.02847	1.53528	3.69543	3.2867	0.601439	0.849817	0.74077	151.898	0	Inactive	-1	-1	-1
1290	CHEMBL109192	2.04284	13	0	0.01724	0	0.0271692	-0.171157	1.30204	3.76401	3.50431	0.702605	0.791546	1.15576	154.257	0.0179877	Inactive	-1	-1	-1
1291	CHEMBL30936	1.90808	12	1	0	0	0.0274242	-0.0106421	1.28349	3.71233	3.52471	0.919683	1.16792	1.04796	149.547	0	Inactive	-1	-1	-1
1292	CHEMBL137166	1.98382	11	1	0.05263	0	0.0216811	-0.134838	1.63558	3.47809	3.0875	0.602669	0.895493	0.94308	149.002	0	Inactive	-1	-1	-1
1293	CHEMBL472879	2.00493	11	2	0.07143	0	0.0196962	-0.245647	1.1159	3.33282	3.21866	0.721263	0.637322	1.05483	154.341	0	Inactive	-1	-1	-1
1294	CHEMBL280012	1.97865	10	1	0.06818	0	0.0287313	-0.155655	1.31926	3.62936	3.2137	0.859384	0.95837	0.98023	148.222	0	Inactive	-1	-1	-1
1295	CHEMBL559400	1.88319	9	0	0.02	1.44085	0.0278486	0.112995	1.55638	3.81112	3.50195	0.752284	0.954982	0.9398	154.175	0.0645497	Inactive	-1	-1	-1
1296	CHEMBL394409	2.11568	13	1	0	2.14551	0.0227078	0.04732	1.46925	3.71023	3.3931	0.751489	0.981462	0.86456	147.827	0	Inactive	-1	-1	-1
1297	CHEMBL1822439	2.04624	10	0	0.02083	1.42168	0.0185314	-0.0907481	1.33718	3.55048	3.44393	0.622213	0.901514	1.11078	161.929	0.00348536	Inactive	-1	-1	-1
1298	CHEMBL1089747	1.90152	11	1	0.07143	0	0.0298641	-0.0998143	1.36785	3.51821	3.27453	0.653229	0.866992	0.92229	150.248	0	Inactive	-1	-1	-1
1299	CHEMBL2381926	1.92947	12	1	0.03571	0	0.0319837	-0.157786	1.21764	3.79073	3.46339	0.982977	0.900947	0.91567	156.482	0	Inactive	-1	1	-1
1300	CHEMBL1929344	1.97784	11	1	0.03333	0	0.0227303	0.193721	1.368	3.79998	3.69944	0.892173	0.897204	1.01007	154.236	0	Inactive	-1	-1	-1
1301	CHEMBL490	1.88898	11	0	0.08824	0	0.024665	-0.0160855	1.62418	3.32114	2.85569	0.651373	0.985933	0.95491	147.257	0	Inactive	-1	-1	-1
1302	CHEMBL1213315	2.00212	10	2	0.04688	1.78509	0.0236063	0.00489877	1.32142	3.70039	3.48797	0.764192	0.932557	1.01937	159.473	0.00449958	Inactive	-1	-1	-1
1303	CHEMBL136175	2.05499	17	3	0.05357	0	0.0246459	-0.197324	1.23744	3.73844	3.44105	0.906479	0.779578	1.10447	149.956	0	Inactive	-1	-1	-1
1304	CHEMBL212427	2.02441	5	0	0.025	0	0.0227838	-0.0832297	1.6194	3.41288	3.32933	1.0917	1.34278	1.05216	151.691	0.0212344	Inactive	-1	-1	-1
1305	CHEMBL463203	1.8471	5	2	0.02273	0	0.0295463	0.0288268	1.1818	3.5702	3.33345	0.823986	1.01536	0.84631	159.241	0	Inactive	-1	-1	-1
1306	CHEMBL329687	1.94163	16	1	0.03448	0	0.0228028	-0.058965	1.48489	3.8229	3.62249	0.730358	0.919663	1.09719	152.489	0	Inactive	-1	-1	-1
1307	CHEMBL1093718	1.90188	13	3	0.10417	0	0.0219803	-0.246245	1.19132	3.46973	3.19533	0.762938	0.76333	1.10453	155.691	0	Inactive	-1	-1	-1
1308	CHEMBL400084	1.89667	11	0	0.02	1.81784	0.0235934	0.149265	1.50886	3.82103	3.50182	0.794954	0.961963	0.98382	153.996	0.0645497	Inactive	-1	-1	-1
1309	CHEMBL463004	2.02952	12	1	0.10345	0	0.0193224	-0.0751364	1.38306	3.6269	3.43276	0.555237	1.1106	1.35631	153.276	0	Inactive	-1	-1	-1
1310	CHEMBL174748	2.06299	1	1	0	0	0.0499072	-0.0489193	1.01262	3.42552	3.01687	1.1216	1.01864	0.44511	153.472	0	Inactive	-1	-1	-1
1311	CHEMBL3581841	1.90725	16	0	0.03125	0	0.0318353	0.0208899	1.23173	3.84744	3.64224	0.962351	1.12698	0.8982	154.024	0	Inactive	-1	-1	-1
1312	CHEMBL1774621	2.03559	9	0	0.025	0	0.0308871	-0.132016	1.55103	3.45763	3.16808	0.997967	1.14407	0.90353	143.124	0	Inactive	-1	-1	-1
1313	CHEMBL2408995	1.92014	11	1	0.02381	0	0.0313442	0.011114	1.18177	3.6131	3.40157	1.11012	1.17746	0.79537	152.512	0	Inactive	-1	-1	-1
1314	CHEMBL498725	1.95969	11	1	0.03571	0	0.0225978	0.104935	1.40782	3.79988	3.68656	0.883645	1.03975	0.99602	150.648	0	Inactive	-1	-1	-1
1315	CHEMBL136459	1.64204	1	1	0	0	0.0205196	0.0532146	0.957793	3.43216	3.17601	0.832637	0.986184	0.85974	164.32	0	Inactive	-1	-1	-1
1316	CHEMBL3426276	2.09576	3	2	0	6.64337	0.0423502	-0.230782	1.07337	3.64316	3.45719	0.807452	0.9869	0.62905	152.27	0.195602	Inactive	-1	-1	-1
1317	CHEMBL2316636	1.91411	5	0	0.01923	0	0.0237366	-0.0334991	1.24485	3.73101	3.55204	0.773642	0.981167	0.89737	157.705	0	Inactive	-1	1	-1
1318	CHEMBL423911	2.00584	14	1	0.04348	0	0.0399071	-0.0877694	1.59294	3.78478	3.24333	1.01324	0.92768	0.92511	147.2	0	Inactive	-1	-1	-1
1319	CHEMBL1796412	2.15041	8	4	0	0	0.0400667	0.00521759	1.24865	3.88185	3.47953	0.976624	1.10089	0.65272	150.124	0	Inactive	-1	-1	-1
1320	CHEMBL1774694	1.88912	10	1	0.02	0	0.0359954	0.053349	1.28983	3.7035	3.61218	1.00844	1.15579	0.72891	149.369	0	Inactive	-1	-1	-1
1321	CHEMBL230954	1.7843	6	2	0	0	0.0196095	-0.00106061	1.21946	3.74465	3.35801	0.953256	1.06562	0.95935	158.017	0	Inactive	-1	-1	-1
1322	CHEMBL1215343	2.03996	12	0	0.01429	0	0.0327635	-0.133321	1.21163	3.85447	3.62036	0.936754	0.973264	0.84221	152.492	0	Inactive	-1	-1	-1
1323	CHEMBL1170173	1.95566	8	0	0	0	0.0219155	-0.139531	1.33539	3.19996	3.04903	0.760805	0.90053	0.82186	148.295	0	Inactive	-1	-1	-1
1324	CHEMBL227903	1.93071	10	2	0	0	0.0292165	-0.216851	1.14314	3.67514	3.44155	0.92054	0.937141	0.91216	157.044	0	Inactive	-1	-1	-1
1325	CHEMBL309490	1.89475	13	0	0.07895	0	0.0232605	-0.118371	1.34558	3.44201	3.01085	0.771234	1.15796	1.02126	142.738	0	Inactive	-1	-1	-1
1326	CHEMBL1644939	1.85765	4	0	0	0	0.047753	-0.0737473	1.05715	3.49912	3.25147	0.712719	1.0551	0.40676	154.945	0	Inactive	-1	-1	-1
1327	CHEMBL25112	2.05646	10	1	0	0	0.0235124	-0.133084	1.44041	3.74037	3.58382	0.94211	0.927693	1.02671	154.598	0.00981479	Inactive	-1	-1	-1
1328	CHEMBL2316635	1.9709	16	2	0.03704	0	0.0270408	0.0402476	1.2911	3.84	3.59256	1.02583	1.00555	0.99639	151.756	0	Inactive	-1	-1	-1
1329	CHEMBL1951007	1.9193	13	1	0.02083	0	0.0257978	-0.038965	1.29758	3.78269	3.55324	0.983721	1.05896	0.90634	154.864	0	Inactive	-1	-1	-1
1330	CHEMBL2408989	1.89114	19	2	0	0	0.025948	-0.0184282	1.3324	3.86799	3.83866	0.939189	1.12701	1.1529	152.873	0	Inactive	-1	-1	-1
1331	CHEMBL573652	2.01042	18	0	0.03226	0	0.0291287	-0.0542742	1.71102	3.85087	3.5395	0.874718	1.03723	1.26683	141.963	0	Inactive	-1	-1	-1
1332	CHEMBL1213665	2.15601	9	2	0.04762	0	0.0241534	-0.133181	1.13395	3.42098	3.27302	0.858724	0.608568	0.95896	154.709	0	Inactive	-1	-1	-1
1333	CHEMBL390257	1.93672	11	0	0.02381	0	0.0222399	-0.0788183	1.43429	3.67424	3.05077	0.660464	0.879346	0.99165	154.6	0	Inactive	-1	-1	-1
1334	CHEMBL463005	2.05118	12	1	0.07407	0	0.0211988	-0.0439723	1.3942	3.58343	3.43183	0.628035	1.11178	1.27699	150.626	0	Inactive	-1	-1	-1
1335	CHEMBL1796431	1.96512	12	0	0.02273	0	0.0323452	-0.216252	1.42715	3.54881	3.14804	0.960976	1.03222	0.9548	142.42	0	Inactive	-1	-1	-1
1336	CHEMBL194225	1.96937	18	2	0.04545	0	0.0261932	-0.0162801	1.20365	3.9362	3.62765	0.909624	1.01839	1.04815	155.659	0	Inactive	-1	-1	-1
1337	CHEMBL294951	1.95414	18	0	0.025	0	0.0264508	0.0383015	1.44146	3.87277	3.76793	0.931153	0.960089	1.27171	153.364	0	Inactive	-1	-1	-1
1338	CHEMBL1780020	1.93174	14	0	0	0	0.0280769	-0.0820408	1.33339	3.70846	3.44942	0.550816	0.73709	0.89557	153.537	0	Inactive	-1	-1	-1
1339	CHEMBL489904	2.02355	10	1	0.01613	0	0.0348367	-0.0200014	1.26868	3.85294	3.64968	0.80148	1.01715	0.75892	151.382	0	Inactive	-1	-1	-1
1340	CHEMBL274958	1.99858	11	2	0.04688	0	0.0287346	0.0110677	1.22336	3.70093	3.56637	1.01283	1.06365	0.83991	154.55	0	Inactive	-1	-1	-1
1341	CHEMBL1627157	1.88713	10	0	0	0	0.0379928	0.0821177	1.05018	3.66641	3.33252	1.15898	1.01663	0.76117	156.085	0	Inactive	-1	-1	-1
1342	CHEMBL2431521	1.83105	8	1	0	0	0.0340431	0.0454462	1.09425	3.61234	3.21022	1.14866	1.1269	0.73514	155.021	0	Inactive	-1	-1	-1
1343	CHEMBL363491	1.88172	10	2	0	0	0.0225784	-0.211023	1.20449	3.35845	3.16076	0.745943	0.939278	0.90363	148.315	0	Inactive	-1	-1	-1
1344	CHEMBL3326157	1.87306	10	0	0.04545	0	0.0282182	-0.0125526	1.10435	3.5824	3.31168	0.895966	1.23653	0.86025	149.368	0	Inactive	-1	-1	-1
1345	CHEMBL585651	1.92256	13	1	0.025	0	0.022048	-0.0668649	1.30521	3.49989	3.2736	0.788761	0.817375	0.94674	151.069	0	Inactive	-1	-1	-1
1346	CHEMBL443320	1.92627	4	3	0	2.54223	0.0299161	-0.0525568	1.22009	3.27028	3.05175	0.896674	0.980222	0.53669	152.453	0.0240563	Inactive	-1	-1	-1
1347	CHEMBL2071296	1.91894	6	3	0.11364	0	0.023674	-0.293864	1.11877	3.29014	3.20574	0.744665	0.686292	0.98384	161.116	0	Inactive	-1	-1	-1
1348	CHEMBL8	1.92706	5	1	0	0	0.0408053	0.0772382	1.0285	3.56473	3.14419	1.23355	1.24437	0.53066	155.657	0	Inactive	-1	-1	-1
1349	CHEMBL3218340	1.94101	22	1	0.03659	0	0.0256161	0.0118468	1.43124	3.89605	3.78835	0.888946	1.07895	1.20714	148.54	0	Inactive	-1	-1	-1
1350	CHEMBL3104870	2.09132	22	4	0.05263	4.54515	0.0243767	-0.132121	1.47914	3.85383	3.81559	0.666855	0.824857	1.18795	146.431	0.0178397	Inactive	-1	-1	-1
1351	CHEMBL1917516	2.07406	13	1	0.01389	0	0.0218459	-0.00414231	1.5516	3.83544	3.63576	0.695894	0.83137	1.14283	152.796	0	Inactive	-1	-1	-1
1352	CHEMBL278722	1.93427	10	0	0	0	0.0287373	-0.277396	1.04201	3.68635	3.38087	0.926426	0.947156	0.91799	158.495	0	Inactive	-1	-1	-1
1353	CHEMBL1934540	2.00804	17	0	0.05882	0	0.0348698	-0.0812496	1.5588	3.83871	3.56795	0.701149	0.858607	1.05964	147.681	0	Inactive	-1	1	-1
1354	CHEMBL555144	2.05291	12	0	0.02273	0	0.0246979	-0.0172903	1.6428	3.60243	3.32166	0.62695	0.900527	1.01038	146.788	0	Inactive	-1	-1	-1
1355	CHEMBL2338359	2.07559	9	3	0.01852	0	0.0237932	0.0186698	1.30862	3.61821	3.44306	0.871569	0.758839	1.00326	155.555	0	Inactive	-1	-1	-1
1356	CHEMBL1213794	1.9064	5	0	0.025	0	0.0337712	0.0125862	1.21989	3.54692	3.32933	1.0188	1.33259	0.85834	153.541	0.0212344	Inactive	-1	-1	-1
1357	CHEMBL549845	2.06281	8	0	0.025	0	0.0218553	0.269786	1.24975	3.548	3.33114	0.64233	0.625426	0.93864	160.07	0	Inactive	-1	-1	-1
1358	CHEMBL3577191	2.12614	17	1	0.05357	0	0.021711	-0.0356356	1.44606	3.7398	3.70882	1.04597	1.10222	1.15037	150.179	0	Inactive	-1	-1	-1
1359	CHEMBL1796423	1.96496	15	2	0.01471	0	0.0256678	-0.0487343	1.51142	3.89282	3.61449	0.715753	0.81758	1.0887	151.472	0	Inactive	-1	-1	-1
1360	CHEMBL1822428	2.0157	16	0	0.04545	0	0.0221485	-0.145514	1.41773	3.57562	3.28924	0.741893	1.07674	1.07069	146.019	0	Inactive	-1	1	-1
1361	CHEMBL118671	1.85774	5	0	0	0	0.0564753	-0.143401	1.73494	3.07517	2.77182	0.797087	0.867398	0.54569	150.024	0	Inactive	-1	-1	-1
1362	CHEMBL158418	2.02844	9	1	0	0	0.0346126	-0.0224439	1.25786	3.86069	3.6608	0.977435	1.07208	0.7354	151.896	0	Inactive	-1	-1	-1
1363	CHEMBL1923930	1.95786	12	0	0.02	0	0.0312369	-0.120508	1.42815	3.45836	3.41767	0.775887	0.958626	1.34954	147.556	0	Inactive	-1	-1	-1
1364	CHEMBL1927491	2.031	13	0	0.03846	0	0.0214993	-0.131876	1.58916	3.77861	3.31951	0.564102	0.776178	1.1532	149.114	0	Inactive	-1	-1	-1
1365	CHEMBL1834943	1.84553	5	0	0.01923	0	0.0294709	0.138992	1.21231	3.66846	3.46462	0.718798	0.998111	0.76394	155.24	0	Inactive	-1	-1	-1
1366	CHEMBL1822426	1.90645	14	0	0.03333	0	0.0227542	-0.14796	1.42256	3.85797	3.4625	0.766613	1.10371	1.19967	148.598	0	Inactive	-1	1	-1
1367	CHEMBL258071	1.88894	15	1	0.05172	0	0.0276207	-0.037635	1.24879	3.76201	3.54827	0.864515	1.06512	0.91984	149.558	0	Inactive	-1	-1	-1
1368	CHEMBL394752	1.96649	6	2	0	0	0.026398	-0.0965043	1.11051	3.46841	3.31621	0.868739	0.856154	0.76692	151.813	0	Inactive	-1	-1	-1
1369	CHEMBL3218328	1.88055	13	4	0.04762	0	0.0263824	-0.291889	1.26033	3.9537	3.86731	0.896249	0.858741	1.11275	156.289	0	Inactive	-1	-1	-1
1370	CHEMBL139479	1.85025	5	1	0.02083	0	0.0318412	0.0304479	1.01701	3.62493	3.37846	0.885559	1.18026	0.82986	156.068	0	Inactive	-1	-1	-1
1371	CHEMBL564704	2.04009	18	0	0.02632	0	0.0267955	0.0163794	1.43455	3.83848	3.74897	0.912072	0.924452	1.20392	152.798	0	Inactive	-1	-1	-1
1372	CHEMBL525743	2.04474	18	0	0.02941	0	0.0243295	0.13604	1.48996	3.84895	3.72858	0.847292	1.01326	1.1331	150.21	0	Inactive	-1	-1	-1
1373	CHEMBL252748	1.92087	5	1	0.01852	0.988722	0.0269673	0.128343	1.37633	3.70299	3.54846	0.781345	1.03236	0.98077	154.479	0	Inactive	-1	-1	-1
1374	CHEMBL209257	2.06738	9	1	0.01724	0	0.0227838	-0.0398646	1.33042	3.8385	3.56816	0.926006	0.852989	1.07462	155.858	0	Inactive	-1	1	-1
1375	CHEMBL2316646	1.82551	5	0	0	0	0.040885	-0.0664243	1.00931	3.58503	3.1556	1.19723	0.99193	0.51181	160.71	0	Inactive	-1	-1	-1
1376	CHEMBL53639	1.99967	5	0	0.02273	0	0.0210026	-0.115254	1.19124	3.50806	3.41995	0.570261	0.901315	0.98049	160.126	0	Inactive	-1	-1	-1
1377	CHEMBL1043	1.9494	13	0	0.01923	0	0.0265396	-0.0898744	1.58963	3.84088	3.47523	0.879991	1.03348	1.06165	149.998	0	Inactive	-1	-1	-1
1378	CHEMBL1950423	2.03194	12	1	0.02381	0	0.053599	-0.178062	1.47731	3.53946	3.34866	0.962728	1.07736	0.95658	146.426	0.031211	Inactive	-1	-1	-1
1379	CHEMBL159052	1.93831	5	2	0.02632	0	0.0452586	0.0949247	1.33297	3.38355	3.33027	0.687067	0.936051	0.89636	158.612	0	Inactive	-1	-1	-1
1380	CHEMBL1170115	2.03997	7	1	0.03125	0	0.022676	-0.0263078	1.00195	3.50234	2.98095	0.684133	0.952662	0.76046	150.354	0	Inactive	-1	-1	-1
1381	CHEMBL523962	2.10221	12	0	0.01852	0	0.0313434	-0.0994709	1.23704	3.76136	3.52728	0.64687	0.832562	0.97501	151.534	0.0073611	Inactive	-1	1	-1
1382	CHEMBL1928653	1.97692	9	0	0.0303	0	0.0229221	0.0731858	1.43791	3.7647	3.6652	0.891318	1.10865	1.12135	156.339	0.0228075	Inactive	-1	-1	-1
1383	CHEMBL469834	1.81037	5	1	0.02	1.39945	0.0330021	-0.0380262	1.08461	3.66535	3.3998	0.932596	1.08145	0.78444	157.663	0.0456435	Inactive	-1	-1	-1
1384	CHEMBL505208	1.9387	7	1	0.02941	0	0.0249652	-0.0684144	1.14502	3.75537	3.55389	0.748912	0.950951	1.01888	158.189	0	Inactive	-1	-1	-1
1385	CHEMBL2234254	2.04723	11	0	0.03846	0	0.02958	-0.1124	1.3094	3.76591	3.5772	0.894241	1.0285	1.07118	153.279	0.0187649	Inactive	-1	1	-1
1386	CHEMBL60505	1.95449	16	1	0.03846	0	0.0300571	-0.0552345	1.38872	3.82818	3.51393	0.869673	1.01572	0.9683	148.456	0	Inactive	-1	-1	-1
1387	CHEMBL236538	2.18552	16	0	0.03125	0	0.0243099	-0.161484	1.60352	3.81697	3.70882	0.569962	0.73094	1.17263	145.99	0	Inactive	-1	-1	-1
1388	CHEMBL450555	1.98515	9	0	0	1.72128	0.0194577	-0.136083	1.38845	3.57459	3.26291	0.542312	0.681122	1.09817	156.415	0.00449958	Inactive	-1	1	-1
1389	CHEMBL1214232	1.96851	9	1	0	0	0.020756	-0.0356478	1.25094	3.41841	3.11402	0.817249	1.0067	0.91152	146.332	0	Inactive	-1	-1	-1
1390	CHEMBL1947242	1.8924	5	2	0.02778	1.69209	0.0589339	-0.0475918	1.5477	3.36452	3.10217	0.709485	0.948197	0.81948	164.122	0.00449958	Inactive	-1	-1	-1
1391	CHEMBL1088957	2.11582	17	3	0.02857	0	0.0194357	-0.176226	1.36093	3.83448	3.59623	0.76661	0.837892	1.24029	152.188	0	Inactive	-1	1	-1
1392	CHEMBL2431494	2.01553	19	0	0	0	0.022737	-0.0413772	1.46645	3.86306	3.72226	0.939706	1.10009	1.11612	148.218	0	Inactive	-1	-1	-1
1393	CHEMBL2408357	1.98489	12	1	0.03333	0	0.0251793	-0.0179147	1.30012	3.79364	3.62053	0.77378	0.891292	1.04386	155.595	0	Inactive	-1	1	-1
1394	CHEMBL1214029	2.1246	8	2	0	7.03959	0.0398599	-0.194459	1.18946	3.80054	3.64875	0.729464	0.868689	0.84681	150.696	0.202542	Inactive	-1	-1	-1
1395	CHEMBL486496	2.07795	17	0	0.04688	0	0.02606	0.0334588	1.51955	3.77466	3.718	0.790865	0.940848	1.12499	150.969	0.0190063	Inactive	-1	-1	-1
1396	CHEMBL3262100	1.97251	15	2	0	0	0.0246634	-0.0450119	1.34591	3.90718	3.79807	0.897176	0.920888	1.11645	153.867	0	Inactive	-1	-1	-1
1397	CHEMBL1796560	1.87838	6	0	0.03704	0	0.0294484	-0.116585	1.16593	3.73761	3.43965	0.774631	0.837312	0.89701	162.268	0	Inactive	-1	1	-1
1398	CHEMBL3753506	1.90345	13	1	0.05	0	0.0252657	-0.205742	1.24329	3.48427	3.29691	0.854535	1.06045	0.93633	148.846	0	Inactive	-1	-1	-1
1399	CHEMBL2316658	2.02798	10	2	0.01563	0	0.0335943	-0.029229	1.23996	3.85507	3.65431	0.982141	1.05137	0.78373	152.837	0	Inactive	-1	-1	-1
1400	CHEMBL3104864	1.85082	5	1	0.02778	0	0.0300916	-0.0290248	1.13555	3.71017	3.17065	1.05731	0.815056	0.75372	162.922	0	Inactive	-1	-1	-1
1401	CHEMBL158570	1.98626	9	2	0.04839	0	0.0317235	0.0110564	1.25476	3.70084	3.5566	0.966848	0.994675	0.80742	154.474	0	Inactive	-1	-1	-1
1402	CHEMBL398404	1.95419	13	0	0.02083	0	0.0309732	-0.178986	1.59296	3.55571	3.30914	0.97937	1.10742	1.08768	142.064	0	Inactive	-1	-1	-1
1403	CHEMBL2408795	1.87771	10	1	0.01667	0	0.0306469	0.0572541	1.14587	3.77964	3.58473	0.924088	1.195	0.92382	152.648	0	Inactive	-1	-1	-1
1404	CHEMBL55837	1.76271	0	0	0	0	0.0660656	-0.00424187	1.02072	3.3812	3.30629	1.03597	1.36874	0.61537	158.933	0.0212344	Inactive	-1	-1	-1
1405	CHEMBL1078969	1.91559	14	4	0.03571	0	0.0232376	-0.0724769	1.56347	3.83793	3.46832	0.738096	0.922231	0.96112	148.636	0	Inactive	-1	-1	-1
1406	CHEMBL556257	1.81162	6	1	0	0	0.0341231	0.0253124	1.26115	3.6883	3.508	0.942727	1.111	0.95674	155.85	0	Inactive	-1	-1	-1
1407	CHEMBL1822425	2.09196	12	0	0.02	0	0.023355	-0.220464	1.24337	3.72443	3.36856	0.744918	0.993945	1.11775	146.038	0	Inactive	-1	-1	-1
1408	CHEMBL2408817	1.88675	3	4	0	2.8979	0.0395	-0.10803	0.992916	3.58288	3.41388	0.95019	1.13148	0.53226	157.577	0	Inactive	-1	-1	-1
1409	CHEMBL3581809	1.96017	11	0	0.01667	0	0.032603	-0.063645	1.41738	3.82321	3.62168	0.778941	0.955752	1.02698	152.139	0.00849986	Inactive	-1	-1	-1
1410	CHEMBL1277319	2.07986	14	1	0.025	0	0.0200886	-0.0653511	1.31004	3.63508	3.24418	0.857668	0.896063	0.94471	151.937	0	Inactive	-1	-1	-1
1411	CHEMBL226396	1.97099	7	0	0.02174	0	0.0306819	-0.142815	1.12849	3.5991	3.38644	0.767161	0.837422	0.80178	159.821	0	Inactive	-1	1	-1
1412	CHEMBL238329	1.93997	13	0	0.05	0	0.0258352	-0.120353	1.24436	3.52121	3.27884	0.858856	0.86827	0.96579	151.493	0	Inactive	-1	1	-1
1413	CHEMBL2386196	1.96257	11	0	0	0	0.0318994	-0.034837	1.115	3.7349	3.57933	1.04809	1.07179	0.71785	154.713	0	Inactive	-1	1	-1
1414	CHEMBL1796414	1.93076	13	4	0.01786	0	0.0244772	-0.0742392	1.38639	3.85638	3.47095	0.890979	0.994291	0.90629	150.643	0	Inactive	-1	-1	-1
1415	CHEMBL457606	1.60406	1	1	0	0	0.0203587	-0.0657581	0.958545	3.32716	3.17586	0.854298	1.15851	0.83616	162.531	0	Inactive	-1	-1	-1
1416	CHEMBL521156	1.92958	11	1	0.05	0	0.0248851	-0.191174	1.25998	3.49249	3.25209	0.864023	0.92116	0.89885	154.465	0	Inactive	-1	-1	-1
1417	CHEMBL2373964	1.98775	15	1	0	0	0.0235252	-0.0261584	1.46997	3.83842	3.65218	0.892736	0.941517	1.16821	151.604	0	Inactive	-1	-1	-1
1418	CHEMBL1089376	2.09085	12	0	0.05882	0	0.0269117	-0.0545917	1.49589	3.48803	2.87529	0.77336	0.957443	1.02762	145.848	0.0169997	Inactive	-1	-1	-1
1419	CHEMBL3344521	1.98561	6	0	0.04348	1.56827	0.0214627	0.0431852	1.09308	3.46554	3.2112	0.617792	0.962928	0.9995	150.187	0	Inactive	-1	-1	-1
1420	CHEMBL218739	2.02059	18	0	0.03448	0	0.0336741	-0.0990604	1.67706	3.82162	3.50913	1.08795	1.08931	1.08884	140.284	0	Inactive	-1	-1	-1
1421	CHEMBL522502	1.95291	11	2	0	0	0.0238415	-0.0136809	1.35139	3.83447	3.56078	0.875839	1.01891	1.0213	152.592	0	Inactive	-1	-1	-1
1422	CHEMBL15688	1.8964	10	4	0	0	0.029496	-0.107349	1.07164	3.70771	3.55192	1.09084	0.89979	0.7997	157.476	0	Inactive	-1	-1	-1
1423	CHEMBL2437290	1.89739	12	0	0.025	0	0.0329298	-0.0140855	1.19261	3.84484	3.75768	0.786402	0.871822	0.97296	157.884	0	Inactive	-1	1	-1
1424	CHEMBL1834888	1.9523	13	0	0.04545	0	0.0309424	-0.153866	1.56234	3.54886	3.15157	0.998745	1.11003	0.99937	140.739	0	Inactive	-1	-1	-1
1425	CHEMBL2377312	1.9555	16	0	0.02778	0	0.0277628	0.0473959	1.39147	3.86055	3.73998	1.05075	1.07503	1.21148	154.724	0	Inactive	-1	-1	-1
1426	CHEMBL402771	2.00057	11	0	0	0	0.0244122	-0.0788772	1.53461	3.55692	3.12	0.904866	0.934594	0.91801	142.524	0	Inactive	-1	-1	-1
1427	CHEMBL1944817	1.91568	10	0	0.04545	0	0.0334034	-0.154899	1.6022	3.64717	3.24776	1.10068	1.18388	0.96201	147.414	0	Inactive	-1	-1	-1
1428	CHEMBL1213506	1.87111	9	2	0.02381	0	0.0217775	-0.185227	1.16842	3.40205	3.16665	0.651623	0.895487	0.94204	149.535	0	Inactive	-1	-1	-1
1429	CHEMBL1213122	2.06435	11	0	0.02	0	0.0237665	0.0408797	1.56153	3.77209	3.4059	0.695901	0.716235	0.96119	154.833	0	Inactive	-1	-1	-1
1430	CHEMBL84010	1.90337	12	0	0	0	0.0376654	-0.00970411	1.28612	3.84533	3.46099	0.905961	0.794509	0.86104	154.072	0	Inactive	-1	-1	-1
1431	CHEMBL219537	1.96495	16	0	0.03333	0	0.0241089	0.056621	1.52738	3.8026	3.7448	0.756308	0.939818	1.22504	147.873	0	Inactive	-1	-1	-1
1432	CHEMBL3827949	1.83921	10	0	0.02273	0	0.0331387	-0.0713319	1.29487	3.63025	3.36405	0.834075	0.917504	0.85027	154.459	0	Inactive	-1	-1	-1
1433	CHEMBL374557	2.00867	11	0	0	2.1024	0.0336606	0.11505	1.31878	3.6673	3.34449	0.730635	0.707534	0.87587	161.35	0.00449958	Inactive	-1	-1	-1
1434	CHEMBL250450	2.10783	14	0	0.04	0	0.0276953	-0.131354	1.50511	3.67185	3.47252	0.608583	0.810127	1.02844	143.731	0.013736	Inactive	-1	-1	-1
1435	CHEMBL1780016	1.9407	7	1	0.04348	0	0.0348138	-0.0989723	1.05804	3.60141	3.41572	0.824409	0.966111	0.64201	157.148	0	Inactive	-1	-1	-1
1436	CHEMBL1796432	1.83921	10	0	0.02273	0	0.0248848	-0.0791659	1.20082	3.63307	3.36501	0.844426	1.13327	0.88334	156.525	0	Inactive	-1	-1	-1
1437	CHEMBL2316654	1.93351	10	0	0.02174	0	0.0391394	0.036532	1.38379	3.75717	3.39876	0.961527	0.984631	0.81934	150.162	0	Inactive	-1	-1	-1
1438	CHEMBL3218330	1.9976	6	1	0.04545	2.06789	0.0228797	0.0095651	1.13565	3.42029	3.19335	0.613086	0.90756	0.95531	149.223	0	Inactive	-1	-1	-1
1439	CHEMBL2408356	1.96479	13	0	0.05	0	0.028439	-0.00290674	1.33578	3.81377	3.50449	0.776419	0.956256	0.93457	155.339	0	Inactive	-1	1	-1
1440	CHEMBL2391947	1.87121	5	2	0.02381	0	0.0281985	0.170943	1.12876	3.5273	3.33344	0.776347	0.958397	0.8794	159.737	0	Inactive	-1	-1	-1
1441	CHEMBL1835170	1.83579	5	2	0.02381	1.7208	0.0271959	-0.197594	1.25784	3.43481	3.30755	0.677143	0.827888	0.8512	168.337	0.0147109	Inactive	-1	-1	-1
1442	CHEMBL1091472	1.94709	11	3	0	0	0.0246759	-0.105759	1.34753	3.84432	3.68989	0.931921	0.875708	1.03633	156.307	0	Inactive	-1	-1	-1
1443	CHEMBL241806	1.8695	15	4	0.0375	0	0.0293841	-0.160475	1.17409	3.85991	3.81199	0.901152	0.951012	1.05655	154.1	0	Inactive	-1	-1	-1
1444	CHEMBL427054	1.94412	13	2	0.09091	0	0.0266765	-0.272995	1.36775	3.46211	3.13235	0.638931	0.640357	1.00661	149.786	0	Inactive	-1	-1	-1
1445	CHEMBL557512	1.84146	4	0	0	0	0.0318294	-0.179221	0.948611	3.42325	3.29826	0.914337	1.0165	0.75051	159.795	0	Inactive	-1	-1	-1
1446	CHEMBL482023	1.93725	13	1	0.04545	0	0.0197896	0.0245908	1.3497	3.5561	3.33349	0.661355	1.05682	1.048	148.064	0	Inactive	-1	-1	-1
1447	CHEMBL2442164	2.1027	14	0	0.04	0	0.0258622	-0.146794	1.43735	3.68122	3.47355	0.641413	0.870342	1.0544	145.145	0.013736	Inactive	-1	-1	-1
1448	CHEMBL486762	1.88704	6	0	0.02778	0	0.0358839	-0.0170162	1.15631	3.66745	3.0485	1.06284	1.10992	0.62797	159.183	0	Inactive	-1	-1	-1
1449	CHEMBL1233654	2.01353	9	1	0	0	0.0278705	-0.0423877	1.31434	3.80713	3.53543	0.979982	0.990047	0.93379	152.933	0	Inactive	-1	-1	-1
1450	CHEMBL218437	1.9934	6	2	0.02083	0	0.0237559	-0.0956141	1.2313	3.68819	3.43804	0.938682	0.846588	0.94358	160.168	0	Inactive	-1	1	-1
1451	CHEMBL2408803	1.88048	12	1	0	0	0.0292418	0.0755076	1.20214	3.79587	3.69623	0.875883	1.1883	1.12217	153.787	0	Inactive	-1	-1	-1
1452	CHEMBL596428	1.87064	9	0	0.02381	0	0.0445398	-0.0215483	1.44626	3.79544	3.25896	1.0353	1.28218	0.71447	148.787	0	Inactive	-1	-1	-1
1453	CHEMBL450166	1.89899	12	1	0	0	0.0276262	-0.0132524	1.24209	3.74387	3.63654	0.884892	1.17642	1.10122	152.028	0	Inactive	-1	-1	-1
1454	CHEMBL1213813	1.95551	23	2	0.06061	0	0.022819	-0.110065	1.42534	3.88726	3.68427	0.858724	0.953507	1.19024	149.304	0	Inactive	-1	-1	-1
1455	CHEMBL1928402	1.94067	13	1	0.07692	0	0.0236644	-0.0465959	1.30471	3.6466	3.42878	0.753471	0.96156	1.05245	149.394	0	Inactive	-1	1	-1
1456	CHEMBL3601501	1.90502	11	0	0.0625	0	0.0268775	0.0112373	1.63219	3.30713	2.83134	0.690913	0.985794	0.90436	145.206	0	Inactive	-1	-1	-1
1457	CHEMBL3262096	1.98738	16	0	0	0	0.0248234	-0.00261878	1.34513	3.93412	3.81612	0.853418	0.975694	1.152	152.439	0	Inactive	-1	-1	-1
1458	CHEMBL559073	1.90277	6	0	0.03125	0	0.0381507	-0.00996978	1.01514	3.48343	2.98154	1.00564	1.18968	0.67172	157.453	0	Inactive	-1	1	-1
1459	CHEMBL570211	1.99944	13	1	0.03125	0	0.0279456	-0.0532268	1.17404	3.72426	3.55518	0.939655	1.00937	0.92081	153.545	0	Inactive	-1	-1	-1
1460	CHEMBL2338058	1.99307	14	1	0.06897	0	0.0264728	-0.17968	1.17813	3.61101	3.467	0.714125	0.825085	0.977	152.695	0	Inactive	-1	-1	-1
1461	CHEMBL473375	1.87951	10	0	0.05769	0	0.0253448	0.0909572	1.37111	3.64953	3.45638	0.63694	0.857615	1.00642	153.064	0	Inactive	-1	1	-1
1462	CHEMBL3335112	1.97299	10	0	0.02941	0	0.0300879	0.0304701	1.24208	3.50439	3.06576	0.941562	1.13687	0.86146	148.99	0	Inactive	-1	-1	-1
1463	CHEMBL270900	1.88256	6	0	0	0	0.0301935	0.0355219	1.16047	3.44206	2.97855	1.06061	1.00041	0.74444	156.604	0	Inactive	-1	-1	-1
1464	CHEMBL2071259	1.90057	12	1	0.05	0	0.020218	-0.0153369	1.48243	3.45001	3.08303	0.644489	1.01037	0.99615	144.204	0	Inactive	-1	-1	-1
1465	CHEMBL116834	1.95599	7	0	0.07895	0	0.0167759	-0.165589	1.27726	3.47951	3.05338	0.598437	0.983999	1.06458	156.813	0	Inactive	-1	1	-1
1466	CHEMBL1830320	1.91663	12	0	0.05882	0	0.0254273	0.0607021	1.24158	3.50137	3.00546	0.913115	1.22175	0.90591	151.097	0	Inactive	-1	-1	-1
1467	CHEMBL230907	1.93334	12	1	0.025	0	0.0279864	-0.168334	1.27955	3.49379	3.30512	0.898883	0.992812	0.88696	148.569	0	Inactive	-1	-1	-1
1468	CHEMBL3104737	1.98681	16	0	0.02941	0	0.0316555	0.0327248	1.3603	3.80207	3.74115	0.823813	1.01213	1.06256	149.948	0	Inactive	-1	-1	-1
1469	CHEMBL1214670	2.01929	9	1	0.02941	0	0.0199318	-0.181265	1.24049	3.35932	3.17017	0.804752	0.80183	0.9504	150.486	0	Inactive	-1	-1	-1
1470	CHEMBL47458	1.95276	10	2	0	0	0.031865	-0.0302409	1.23007	3.69833	3.40385	1.10537	0.96426	0.76742	154.747	0	Inactive	-1	-1	-1
1471	CHEMBL2094683	1.98896	14	0	0.04688	0	0.0219386	-0.202024	1.29628	3.91626	3.47139	0.665531	0.885036	1.16571	154.52	0	Inactive	-1	-1	-1
1472	CHEMBL218467	1.9806	12	1	0.01389	0	0.0242721	-0.0145911	1.33342	3.83902	3.66215	0.862343	0.98409	1.12005	154.913	0.00849986	Inactive	-1	-1	-1
1473	CHEMBL3120850	1.97191	10	1	0	0	0.0263094	-0.142803	1.27233	3.5478	3.26566	0.998935	0.95924	0.8508	154.335	0	Inactive	-1	-1	-1
1474	CHEMBL127588	2.1305	9	0	0	0	0.0215201	-0.172329	1.18436	3.38946	3.26261	0.784224	0.925712	0.88431	148.507	0	Inactive	-1	-1	-1
1475	CHEMBL2338360	1.87748	5	0	0.02273	0	0.0359485	-0.0723644	1.46837	3.61574	3.23799	0.934708	1.0819	0.72633	153.127	0	Inactive	-1	-1	-1
1476	CHEMBL1173580	1.85499	6	2	0.03846	0	0.0319839	0.0296809	1.16798	3.66862	3.36902	0.944299	1.25847	0.72721	152.648	0	Inactive	-1	-1	-1
1477	CHEMBL61266	2.00758	16	1	0.01724	0	0.0281814	-0.0482353	1.41185	3.79767	3.62662	0.830952	0.896019	0.94159	151.37	0	Inactive	-1	-1	-1
1478	CHEMBL557887	1.9842	5	0	0.1	0	0.0229751	-0.288738	1.23122	3.15621	2.87548	0.589678	0.77601	0.9242	153.536	0	Inactive	-1	-1	-1
1479	CHEMBL1689594	2.09634	3	0	0	11.7426	0.0425854	-0.136175	0.984576	3.67187	3.48968	0.858392	1.01211	0.45649	150.544	0.550129	Inactive	-1	-1	-1
1480	CHEMBL1928650	1.74634	0	0	0	1.03395	0.0357257	0.0525313	1.03199	3.5637	3.27102	0.91067	1.21416	0.58095	160.292	0.0456435	Inactive	-1	-1	-1
1481	CHEMBL321924	1.92514	5	0	0.02273	0	0.0376984	-0.103136	1.04783	3.60877	3.38779	0.815328	0.972121	0.57351	158.387	0	Inactive	-1	-1	-1
1482	CHEMBL3752731	1.93464	13	1	0.07143	0	0.0286158	-0.216868	1.37318	3.48062	3.29537	0.634845	0.829431	0.93492	146.871	0	Inactive	-1	-1	-1
1483	CHEMBL1290135	1.9174	11	1	0.01923	0	0.0282838	0.00778843	1.4374	3.75634	3.40478	0.880992	0.962764	1.02517	151.896	0	Inactive	-1	-1	-1
1484	CHEMBL2374206	1.82989	8	6	0.0119	2.7024	0.0221294	-0.0511374	1.23139	3.79804	3.66478	0.849115	1.06123	1.14269	152.354	0.0130946	Inactive	-1	-1	-1
1485	CHEMBL402755	1.96097	11	0	0	0	0.0214919	-0.118151	1.28073	3.56409	3.41237	0.685989	1.02014	1.09668	146.437	0	Inactive	-1	-1	-1
1486	CHEMBL140711	2.00383	14	2	0.05	0	0.0195087	-0.0712986	1.31423	3.77125	3.3915	0.723889	0.849882	1.23416	145.876	0	Inactive	-1	-1	-1
1487	CHEMBL336255	1.88999	14	2	0.05405	0	0.0253164	0.0512915	1.50731	3.83611	3.76497	0.770625	0.904461	1.22776	153.745	0	Inactive	-1	-1	-1
1488	CHEMBL1760524	2.06003	10	0	0.04545	0	0.0196758	-0.110045	1.34631	3.50569	3.35598	0.694922	0.934501	1.03946	153.839	0	Inactive	-1	1	-1
1489	CHEMBL1950417	1.99801	13	2	0.08333	0	0.0258578	-0.164575	1.46404	3.4999	3.37086	0.667957	0.741401	1.04253	147.9	0	Inactive	-1	-1	-1
1490	CHEMBL1929188	1.89664	12	0	0.025	0	0.0212161	-0.135377	1.49317	3.48965	3.21007	0.729499	1.03779	1.02853	144.965	0	Inactive	-1	-1	-1
1491	CHEMBL269032	1.85712	12	2	0.10417	0	0.0240382	0.0858382	1.67496	3.65554	3.28798	0.581814	0.888437	1.02821	148.397	0	Inactive	-1	-1	-1
1492	CHEMBL2419630	1.9043	13	0	0.06818	0	0.0230635	-0.0626682	1.28773	3.53396	3.36973	0.717321	1.10654	1.07534	148.51	0	Inactive	-1	-1	-1
1493	CHEMBL1214756	2.03552	16	1	0	6.69386	0.0286133	-0.00495314	1.36434	3.78211	3.75364	0.928241	1.04712	1.16115	151.538	0.03125	Inactive	-1	-1	-1
1494	CHEMBL2408810	1.78163	0	1	0.025	0.222222	0.0293208	0.247347	1.29537	3.63668	3.25583	0.741893	1.05099	0.73899	159.568	0	Inactive	-1	-1	-1
1495	CHEMBL22129	2.0331	17	0	0.01667	0	0.0254992	-0.0203931	1.4998	3.77145	3.53321	0.557032	0.8244	0.99971	146.864	0	Inactive	-1	-1	-1
1496	CHEMBL144804	2.03297	12	2	0	0	0.0251109	0.0053926	1.31414	3.78572	3.52454	0.784368	1.06135	1.33848	153.423	0	Inactive	-1	-1	-1
1497	CHEMBL2316661	1.86803	13	1	0.05263	0	0.0191448	0.00258419	1.45149	3.4262	2.98687	0.703743	1.10185	1.0059	142.198	0	Inactive	-1	-1	-1
1498	CHEMBL503135	1.96087	22	0	0.02778	0	0.0253614	0.00848579	1.469	3.88468	3.7866	0.863991	1.07404	1.23906	145.768	0	Inactive	-1	-1	-1
1499	CHEMBL3262121	2.04715	12	0	0.03333	1.88176	0.0229071	-0.105165	1.7451	3.81473	3.64129	0.574267	0.688287	1.26855	156.553	0.018686	Inactive	-1	-1	-1
1500	CHEMBL1288747	1.92712	10	3	0.09259	0	0.0236649	-0.14133	1.3327	3.81183	3.23693	0.860081	0.844125	1.06895	155.85	0	Inactive	-1	-1	-1
1501	CHEMBL497840	1.92081	10	1	0.02	0	0.0270288	0.00614174	1.22693	3.6663	3.41119	0.913765	1.12601	1.01999	153.127	0	Inactive	-1	-1	-1
1502	CHEMBL1782666	2.09292	11	0	0	0	0.0226295	-0.0405039	1.40124	3.47129	3.07796	0.802498	0.95925	0.90853	147.452	0	Inactive	-1	-1	-1
1503	CHEMBL1215310	2.00901	16	2	0.04412	0	0.0198625	-0.0427662	1.26737	3.77663	3.55403	0.685277	0.968708	1.26437	145.298	0	Inactive	-1	-1	-1
1504	CHEMBL2022224	1.97622	7	0	0	0	0.0403514	-0.00382927	1.18462	3.69101	3.20404	1.05766	1.21549	0.64503	151.933	0	Inactive	-1	-1	-1
1505	CHEMBL1213257	2.02823	10	0	0.05263	0	0.0251652	-0.14365	1.4743	3.41817	3.16374	0.639191	0.91468	0.9363	145.058	0	Inactive	-1	-1	-1
1506	CHEMBL453816	1.96899	15	0	0	0	0.0222949	-0.0764816	1.32505	3.73936	3.49869	0.80053	1.01517	1.07136	148.996	0	Inactive	-1	-1	-1
1507	CHEMBL1812347	1.95785	7	1	0.03226	1.57938	0.028031	-0.141171	0.997304	3.67059	3.44898	0.820914	0.98032	0.8931	159.337	0.0642229	Inactive	-1	-1	-1
1508	CHEMBL118838	1.95838	6	3	0	0	0.0237507	-0.0325524	1.22043	3.51273	3.31132	0.803429	0.785913	0.8719	153.197	0	Inactive	-1	-1	-1
1509	CHEMBL594580	1.90983	7	2	0.04545	0	0.02475	-0.052596	1.3103	3.716	3.58145	0.837106	0.820637	0.94397	163.183	0	Inactive	-1	1	-1
1510	CHEMBL21690	1.62392	1	1	0.04762	0	0.0174301	-0.0589882	1.05083	3.44325	3.1475	0.847704	1.08554	0.91136	164.76	0	Inactive	-1	-1	-1
1511	CHEMBL279492	1.87833	7	1	0.01724	0	0.038736	-0.0340253	1.5282	3.78841	3.50506	0.623331	0.869107	0.87009	152.808	0.00981479	Inactive	-1	-1	-1
1512	CHEMBL271534	1.93582	16	0	0.04	0	0.0209911	-0.0121905	1.6576	3.82788	3.38697	0.777082	1.07914	1.09169	146.481	0	Inactive	-1	-1	-1
1513	CHEMBL551552	1.96497	7	0	0.04545	0	0.0306621	-0.159573	1.45785	3.50955	3.33342	0.648018	0.748344	0.81147	158.574	0	Inactive	-1	-1	-1
1514	CHEMBL1923934	1.97967	11	0	0.02083	1.38918	0.0215932	0.112428	1.87377	3.51948	3.33141	0.400637	0.783348	1.06724	150.097	0.0728931	Inactive	-1	-1	-1
1515	CHEMBL1928661	1.86779	13	4	0.05263	0	0.0280528	0.0877782	1.18238	3.75986	3.59424	0.981951	0.788906	0.97616	159.03	0	Inactive	-1	-1	-1
1516	CHEMBL3596396	2.13497	9	1	0.02632	0	0.0201462	0.01876	1.11219	3.55734	3.35354	0.575201	0.932654	0.93446	151.232	0	Inactive	-1	-1	-1
1517	CHEMBL2337381	2.10132	12	0	0	0	0.0250052	-0.238734	1.25418	3.71523	3.36699	0.823795	0.992364	1.06413	144.771	0	Inactive	-1	-1	-1
1518	CHEMBL239753	2.01701	11	0	0.03448	1.5362	0.0224573	0.0506174	1.23592	3.74351	3.41357	0.714382	1.03287	1.08329	147.381	0	Inactive	-1	-1	-1
1519	CHEMBL337309	2.14426	9	0	0	0	0.0220474	-0.0012944	1.00367	3.5255	2.95825	0.677744	0.92559	0.82959	148.76	0	Inactive	-1	-1	-1
1520	CHEMBL132031	1.89673	4	0	0.03571	0	0.0277137	-0.23728	1.21401	3.21955	3.02401	0.877138	0.934881	0.65388	159.02	0	Inactive	-1	-1	-1
1521	CHEMBL2391950	1.84149	9	0	0.05	0	0.0199203	0.204944	1.44291	3.83328	3.5689	0.680065	1.00762	1.1607	155.552	0.0555556	Inactive	-1	-1	-1
1522	CHEMBL470819	1.93824	13	3	0.04545	0	0.0193135	-0.0753507	1.38839	3.49911	3.1384	0.759485	0.81189	1.03993	150.884	0	Inactive	-1	-1	-1
1523	CHEMBL3754179	1.93374	13	1	0.04545	0	0.0265435	-0.161932	1.16634	3.53382	3.34709	0.913552	0.861752	0.93325	154.024	0	Inactive	-1	-1	-1
1524	CHEMBL397859	1.91433	0	3	0	6.79632	0.0380453	-0.0175959	1.04675	3.6471	3.375	0.820895	1.41808	0.50967	152.683	0.0291034	Inactive	-1	-1	-1
1525	CHEMBL2338363	1.72781	0	0	0	1.36094	0.0483686	0.0136383	1.00455	3.60795	3.38192	0.995665	1.30955	0.53307	159.416	0.0456435	Inactive	-1	-1	-1
1526	CHEMBL2431483	1.82965	6	1	0.04348	1.15627	0.0303356	-0.120182	1.58326	3.43782	3.3142	0.767222	0.956731	0.94268	159.216	0.00389675	Inactive	-1	-1	-1
1527	CHEMBL2374211	1.84977	5	0	0	0	0.0287234	0.0686708	1.13549	3.6683	3.45787	0.897551	1.02267	0.76768	156.933	0	Inactive	-1	1	-1
1528	CHEMBL1780200	1.92688	5	0	0.02174	0	0.0372001	-0.102707	1.11235	3.73881	3.43974	0.865216	0.902208	0.72965	160.97	0	Inactive	-1	-1	-1
1529	CHEMBL3120844	1.89022	11	0	0.02174	0	0.0248143	-0.0714085	1.26236	3.65853	3.29671	0.856617	1.08786	1.05174	150.705	0	Inactive	-1	-1	-1
1530	CHEMBL489291	1.8785	5	4	0.02778	3.20689	0.0334197	0.0323412	1.42431	3.33461	2.98154	0.530202	0.912665	0.51911	151.266	0	Inactive	-1	-1	-1
1531	CHEMBL2316652	1.96789	7	0	0.04762	0	0.0379969	-0.198884	1.25158	3.50845	3.29009	0.925597	1.03776	0.76282	153.971	0	Inactive	-1	-1	-1
1532	CHEMBL1257966	2.13701	5	2	0	11.2784	0.0304	-0.102999	1.025	3.77743	3.56383	0.718174	0.908355	0.76649	149.494	0.460902	Inactive	-1	-1	-1
1533	CHEMBL491889	2.00673	7	0	0.05263	0	0.0461544	-0.180943	1.24197	3.44668	3.18358	0.869766	0.896549	0.65953	155.325	0	Inactive	-1	-1	-1
1534	CHEMBL1214668	1.95843	15	2	0.07692	0	0.0230589	-0.13812	1.34475	3.60066	3.41687	0.834195	0.979092	1.09629	150.576	0	Inactive	-1	-1	-1
1535	CHEMBL562265	1.92108	9	0	0.06818	0	0.0357277	0.0597419	1.43374	3.69982	3.24279	0.527079	0.863753	0.81397	152.871	0	Inactive	-1	1	-1
1536	CHEMBL121345	1.85006	20	0	0	0	0.0225072	-0.0164346	1.39123	3.85425	3.84043	0.895213	1.15364	1.29011	150.85	0	Inactive	-1	-1	-1
1537	CHEMBL2022218	2.15175	20	4	0	0	0.0296696	-0.02995	1.35909	3.86845	3.83999	1.09059	1.07372	1.1183	148.103	0.0104102	Inactive	-1	-1	-1
1538	CHEMBL3260210	1.98345	11	2	0.10714	0	0.0245714	-0.270965	1.27315	3.74974	3.27809	0.60486	0.726134	1.0702	153.944	0	Inactive	-1	-1	-1
1539	CHEMBL463652	1.8961	17	2	0.07407	0	0.0230558	-0.191921	1.29883	3.80552	3.33816	0.821075	0.938002	1.07845	149.909	0	Inactive	-1	1	-1
1540	CHEMBL2041999	2.13085	4	1	0.01389	2.40203	0.0355219	0.13189	1.33734	3.89379	3.60346	0.829455	0.988927	0.92503	159.312	0.00449958	Inactive	-1	-1	-1
1541	CHEMBL396533	1.9162	13	0	0.04762	0	0.0242763	-0.0370312	1.29203	3.53324	3.369	0.79323	1.10578	1.02826	147.025	0	Inactive	-1	-1	-1
1542	CHEMBL1761045	2.01062	15	0	0.01351	0	0.0297846	0.0128012	1.32606	3.86208	3.79258	0.801217	1.04439	1.00798	152.202	0	Inactive	-1	-1	-1
1543	CHEMBL2169985	1.91577	13	2	0.06522	0	0.0245241	-0.236619	1.30906	3.48174	3.20619	1.04071	0.928291	0.95325	150.322	0	Inactive	-1	-1	-1
1544	CHEMBL1215309	1.93686	13	3	0.10417	0	0.0256347	-0.247083	1.27902	3.46366	3.19477	0.642398	0.568705	1.05267	152.651	0	Inactive	-1	-1	-1
1545	CHEMBL449174	1.83474	5	1	0	0	0.0247978	0.130963	1.13435	3.71654	3.50353	0.998261	1.27246	0.97173	159.084	0	Inactive	-1	-1	-1
1546	CHEMBL335978	1.9024	8	4	0	0	0.0216118	-0.0706169	1.28535	3.48877	3.26973	0.87516	0.982777	0.8407	152.352	0	Inactive	-1	-1	-1
1547	CHEMBL213934	1.78161	5	2	0	1.37568	0.0283226	-0.00057	1.10475	3.67189	3.41639	0.899762	1.05856	0.7809	157.348	0.0456435	Inactive	-1	-1	-1
1548	CHEMBL2408423	1.9935	7	0	0	0	0.0351796	0.0140683	1.37955	3.82688	3.51145	0.773695	0.982954	0.87926	152.34	0	Inactive	-1	-1	-1
1549	CHEMBL3357560	1.89162	11	0	0.09524	0	0.0244775	-0.0935135	1.71135	3.42739	3.17044	0.590088	0.867852	1.12389	146.766	0	Inactive	-1	-1	-1
1550	CHEMBL2316644	1.83721	5	0	0.02941	0	0.0418238	-0.0769502	1.05421	3.58623	3.1556	0.817634	0.843446	0.54026	160.504	0	Inactive	-1	-1	-1
1551	CHEMBL549425	1.97477	10	1	0.02381	0	0.0236295	-0.191003	1.26154	3.50345	3.26409	0.815341	0.808597	0.94931	152.842	0	Inactive	-1	-1	-1
1552	CHEMBL1169787	1.98471	10	0	0.02381	0	0.0196128	-0.16283	1.4084	3.51238	3.16232	0.644295	0.748197	1.03495	148.88	0	Inactive	-1	-1	-1
1553	CHEMBL217786	2.03753	13	0	0.07895	0	0.0236418	-0.0744437	1.5528	3.45289	3.06937	0.663986	0.952145	0.96685	145.734	0	Inactive	-1	-1	-1
1554	CHEMBL1835175	1.89049	5	2	0.02273	1.91688	0.035542	-0.00752974	1.33482	3.52568	3.30757	0.719337	0.866083	0.81216	164.887	0.0147109	Inactive	-1	-1	-1
1555	CHEMBL2087247	1.94456	15	2	0	0	0.02776	-0.076634	1.29893	3.84949	3.62851	0.938424	1.0265	1.09753	152.265	0	Inactive	-1	-1	-1
1556	CHEMBL1944820	2.09728	8	1	0.04762	0	0.0246475	-0.166547	1.46385	3.43742	3.25081	0.729851	0.719638	0.89404	152.194	0	Inactive	-1	1	-1
1557	CHEMBL1169976	2.09528	12	2	0.02381	0	0.0209963	-0.0542938	1.47021	3.58166	3.17256	0.765887	0.808184	0.95464	149.182	0	Inactive	-1	-1	-1
1558	CHEMBL2377295	1.97892	10	0	0	0	0.0241108	-0.104683	1.31172	3.50081	3.20659	0.826873	0.915302	0.91897	149.952	0	Inactive	-1	-1	-1
1559	CHEMBL1669712	1.87919	13	0	0.1	0	0.0215196	-0.149752	1.33066	3.4473	3.01117	0.680163	1.14421	1.07733	146.172	0	Inactive	-1	-1	-1
1560	CHEMBL2435696	2.06613	12	1	0.01351	0	0.0270995	-0.0999472	1.52901	3.86812	3.60037	0.722469	0.779794	1.21094	152.664	0	Inactive	-1	-1	-1
1561	CHEMBL230439	1.94214	8	0	0.01786	0	0.0258869	-0.0142807	1.34846	3.85897	3.69351	1.02118	1.09041	0.95426	152.548	0	Inactive	-1	1	-1
1562	CHEMBL430219	1.91697	3	0	0	0	0.0438008	-0.0418882	1.5104	3.47221	3.1003	0.752564	0.939268	0.61307	158.157	0	Inactive	-1	-1	-1
1563	CHEMBL134838	1.94473	8	4	0	0	0.0303286	0.00525105	1.42178	3.79303	3.46778	0.956833	1.10432	0.7573	151.682	0	Inactive	-1	-1	-1
1564	CHEMBL257263	1.92427	9	0	0.06522	0	0.0252212	-0.0145319	1.51711	3.80301	3.2615	0.580699	0.820381	1.00785	154.462	0	Inactive	-1	-1	-1
1565	CHEMBL533841	1.96263	10	0	0	0	0.0319094	-0.0221632	1.27646	3.57181	3.29197	0.970299	1.06839	0.79558	152.112	0	Inactive	-1	-1	-1
1566	CHEMBL402073	2.08093	13	0	0.05556	0	0.0225353	-0.0382426	1.59615	3.6838	3.49484	0.816209	1.08309	1.36498	150.238	0.00849986	Inactive	-1	-1	-1
1567	CHEMBL207335	1.87253	13	1	0.1087	0	0.0161987	-0.0363179	1.28209	3.45794	3.04686	0.528738	1.15621	1.1872	143.073	0	Inactive	-1	-1	-1
1568	CHEMBL3260213	1.87045	10	1	0.01786	0	0.0299254	-0.121759	1.22505	3.77794	3.51139	1.03776	1.02728	0.89803	157.717	0	Inactive	-1	-1	-1
1569	CHEMBL1916924	1.86401	13	2	0.025	0	0.0315036	-0.0134784	1.26891	3.93776	3.85756	1.03873	1.01759	0.98584	153.714	0	Inactive	-1	-1	-1
1570	CHEMBL488897	1.99966	12	0	0	0	0.0234358	-0.187496	1.26725	3.45922	3.12077	0.82197	0.986355	0.85112	146.025	0	Inactive	-1	-1	-1
1571	CHEMBL422005	1.88306	5	2	0.02273	0	0.0596396	0.126887	1.37644	3.5658	3.33459	0.736259	1.01383	0.78589	155.265	0	Inactive	-1	-1	-1
1572	CHEMBL467738	1.96079	9	1	0.04762	0	0.0228263	-0.201589	1.12372	3.4851	3.19573	0.68588	0.980988	0.94373	147.44	0	Inactive	-1	-1	-1
1573	CHEMBL1089910	2.00418	12	2	0.04167	0	0.0284013	-0.0670562	1.16652	3.80154	3.56681	0.789958	0.872194	0.97119	157.962	0	Inactive	-1	1	-1
1574	CHEMBL2087271	1.79969	4	2	0	0.2	0.0235302	0.20829	1.10799	3.65418	3.41531	0.695259	1.07553	0.80751	161.563	0	Inactive	-1	-1	-1
1575	CHEMBL3828424	1.9862	6	1	0.11905	0	0.0315947	-0.0595829	1.35829	3.40152	3.27782	0.546862	0.610824	0.8297	155.594	0	Inactive	-1	1	-1
1576	CHEMBL2442156	2.01973	14	0	0.04348	0	0.0365639	-0.141746	1.56204	3.65919	3.11543	0.627575	0.794231	0.8179	142.517	0	Inactive	-1	-1	-1
1577	CHEMBL53339	1.94876	12	2	0.04545	0	0.0261623	-0.253451	1.20765	3.50106	3.25382	0.89762	0.847082	0.94309	151.429	0	Inactive	-1	-1	-1
1578	CHEMBL496010	1.97082	8	0	0.01923	0	0.0212529	-0.164259	1.30627	3.62718	3.36577	0.722851	0.880644	1.0399	149.796	0	Inactive	-1	1	-1
1579	CHEMBL1214742	1.98595	11	2	0.06667	0	0.0200091	0.0796695	1.35357	3.64912	3.56722	0.647246	0.888462	1.04948	150.785	0	Inactive	-1	-1	-1
1580	CHEMBL3785802	1.95391	11	1	0.03448	0	0.0285024	-0.00637634	1.32579	3.71078	3.52028	0.745174	0.986692	0.86584	154.606	0	Inactive	-1	-1	-1
1581	CHEMBL335121	1.99589	10	0	0	0	0.0205046	-0.15571	1.41773	3.49752	3.15388	0.722248	0.745484	0.99001	147.342	0	Inactive	-1	-1	-1
1582	CHEMBL23327	2.00269	19	0	0.02381	0	0.0286432	0.0472019	1.2867	3.88546	3.75594	0.792964	1.06913	1.17419	150.283	0	Inactive	-1	-1	-1
1583	CHEMBL2413888	1.92752	10	0	0.02273	0	0.0322176	0.0272644	1.23845	3.66904	3.27882	0.763552	0.781729	0.78941	155.334	0	Inactive	-1	-1	-1
1584	CHEMBL271251	1.96975	12	0	0	0	0.0266683	-0.0102772	1.41176	3.79784	3.30598	0.979769	1.11574	0.95498	150.047	0	Inactive	-1	-1	-1
1585	CHEMBL325533	1.89498	5	0	0	2.03963	0.0501723	-0.115508	1.05762	3.66225	3.32933	0.91768	1.19735	0.83493	155.954	0.140287	Inactive	-1	-1	-1
1586	CHEMBL1822421	2.0625	19	4	0	0	0.037083	-0.0236435	1.38661	3.8684	3.83993	1.11752	1.03135	0.95914	148.205	0	Inactive	-1	-1	-1
1587	CHEMBL393220	1.93108	13	0	0.025	0	0.0276047	-0.15767	1.53051	3.50947	3.21169	0.663235	0.974497	1.04483	143.536	0	Inactive	-1	-1	-1
1588	CHEMBL372524	2.21654	20	0	0.01724	0	0.0211625	-0.0627375	1.56584	3.85227	3.48223	0.811361	0.971721	1.15452	141.73	0	Inactive	-1	-1	-1
1589	CHEMBL384238	2.04348	12	0	0.03704	0	0.0252529	-0.00410313	1.45719	3.79458	3.64947	0.846513	0.944122	1.02834	156.651	0.0169997	Inactive	-1	1	-1
1590	CHEMBL1614913	2.09541	15	1	0.03846	0	0.0360055	-0.0971005	1.57954	3.78429	3.42019	1.03481	0.918043	1.00569	144.505	0	Inactive	-1	-1	-1
1591	CHEMBL1812338	2.07163	13	1	0.04545	0	0.0263907	-0.120647	1.56102	3.52034	3.32731	0.650093	0.83739	0.9682	148.518	0	Inactive	-1	-1	-1
1592	CHEMBL1927484	1.90799	10	0	0.04348	0	0.0248646	-0.248228	1.08293	3.59945	3.36282	0.883783	1.02862	0.93094	155.163	0	Inactive	-1	1	-1
1593	CHEMBL1796434	1.89575	11	1	0.01852	0	0.0367013	0.0980654	1.23896	3.8134	3.58815	1.16261	1.04799	0.72143	156.148	0	Inactive	-1	-1	-1
1594	CHEMBL1651054	1.98316	11	1	0.025	0	0.0207558	-0.207935	1.31979	3.46439	3.13003	0.77398	0.678511	0.93812	151.253	0	Inactive	-1	-1	-1
1595	CHEMBL497965	1.92863	6	1	0.05556	0	0.0310987	0.021505	1.18683	3.63204	3.51445	0.842755	1.1316	0.71805	153.577	0	Inactive	-1	-1	-1
1596	CHEMBL376236	1.94106	17	0	0.03125	0	0.0284362	0.0160617	1.45038	3.80171	3.72192	0.76079	0.990059	1.14039	148.945	0	Inactive	-1	-1	-1
1597	CHEMBL1939606	1.85338	6	0	0	0	0.024213	-0.0406856	1.35825	3.35058	2.91677	0.696639	0.973159	0.89482	145.486	0	Inactive	-1	-1	-1
1598	CHEMBL203648	1.83452	5	0	0	0	0.0293059	-0.0612749	1.21359	3.43102	3.23565	0.780908	1.05522	0.91084	154.279	0	Inactive	-1	-1	-1
1599	CHEMBL1224668	1.94027	11	0	0.02778	0	0.024638	-0.11203	1.54479	3.42833	3.01455	0.645383	0.888352	0.92217	142.904	0	Inactive	-1	-1	-1
1600	CHEMBL1644937	1.91409	10	0	0.04	0	0.0289295	0.0185953	1.24242	3.65168	3.42089	0.796676	1.18939	0.96678	151.786	0	Inactive	-1	1	-1
1601	CHEMBL277535	2.17025	0	0	0	15.9275	0.0473359	-0.144866	0.972712	3.72941	3.49905	0.886581	1.0172	0.30846	149.851	0.655469	Inactive	-1	-1	-1
1602	CHEMBL1770932	1.90851	8	2	0.0625	0	0.0309639	-0.174412	1.10399	3.48635	3.24668	0.886933	0.934744	0.9229	155.633	0	Inactive	-1	-1	-1
1603	CHEMBL56073	2.02812	11	0	0.05172	0	0.0217599	0.0429207	1.34607	3.65888	3.56104	0.663407	0.864373	1.02993	151.333	0	Inactive	-1	1	-1
1604	CHEMBL1162121	1.90837	15	2	0.02632	0	0.0325878	0.0225253	1.28788	3.87285	3.74379	0.760464	0.851548	0.9958	154.601	0	Inactive	-1	-1	-1
1605	CHEMBL53439	1.96188	12	0	0	0	0.0312218	-0.0868035	1.41969	3.85385	3.74731	0.897273	0.909877	0.94849	153.196	0	Inactive	-1	-1	-1
1606	CHEMBL3753116	2.03923	14	1	0.02174	0	0.0242434	-0.216125	1.25503	3.54339	3.36897	0.897461	0.993194	0.99166	147.392	0	Inactive	-1	-1	-1
1607	CHEMBL1169788	1.97237	11	0	0.02632	0	0.0203183	-0.163087	1.33507	3.45511	3.12054	0.686812	0.78617	0.94981	149.568	0	Inactive	-1	-1	-1
1608	CHEMBL563755	1.99224	19	0	0.0625	0	0.0245456	-0.141617	1.49677	3.88084	3.63204	0.75139	0.995513	1.26071	148.687	0.00849986	Inactive	-1	-1	-1
1609	CHEMBL1079865	2.17502	9	0	0	0	0.0272674	0.114196	1.22675	3.63167	3.29019	0.946872	0.741369	0.79926	149.395	0	Inactive	-1	-1	-1
1610	CHEMBL606698	1.88362	5	0	0.03226	0	0.031317	0.112483	1.50898	3.80869	3.71408	0.607537	0.782205	0.90936	160.903	0	Inactive	-1	1	-1
1611	CHEMBL423910	2.05984	8	2	0.02174	0	0.0234086	0.0250826	1.34121	3.52576	3.39385	0.775458	0.945769	1.00928	156.136	0	Inactive	-1	-1	-1
1612	CHEMBL2314398	1.76625	5	1	0	0	0.0474559	-0.0585585	0.971456	3.62103	3.26339	1.20476	1.1387	0.54533	158.853	0	Inactive	-1	-1	-1
1613	CHEMBL1818699	1.95081	12	0	0.02381	0	0.0313696	-0.0607101	1.33466	3.58329	3.39141	0.931686	1.11638	0.85336	146.834	0	Inactive	-1	-1	-1
1614	CHEMBL376916	1.93196	16	1	0.03226	0	0.0273812	0.0153537	1.42716	3.80158	3.65663	0.81123	0.928898	1.11382	150.724	0	Inactive	-1	-1	-1
1615	CHEMBL3601504	1.9845	9	0	0.04348	0	0.0339337	-0.136253	1.22224	3.73008	3.17685	0.898195	0.81449	0.82781	160.488	0	Inactive	-1	-1	-1
1616	CHEMBL1289222	1.91347	11	3	0.05	0	0.0264314	-0.016168	1.36741	3.75816	3.42885	0.857366	0.826084	1.10703	155.416	0	Inactive	-1	-1	-1
1617	CHEMBL2408802	2.01754	18	0	0.03125	0	0.0324637	-0.126167	1.6908	3.837	3.53945	1.05217	1.09121	1.20589	141.384	0	Inactive	-1	-1	-1
1618	CHEMBL301244	2.15582	10	0	0	0	0.020906	-0.149039	1.22155	3.46496	3.32509	0.745525	0.754513	1.02036	147.901	0	Inactive	-1	-1	-1
1619	CHEMBL429648	2.03671	14	0	0.04545	0	0.0222203	-0.189559	1.36048	3.53861	3.32575	0.753104	1.03556	1.07562	146.158	0	Inactive	-1	1	-1
1620	CHEMBL2261393	1.97344	7	0	0.02083	0	0.0203143	0.0522582	1.32478	3.71484	3.35962	0.831445	1.01279	0.96131	154.472	0	Inactive	-1	-1	-1
1621	CHEMBL602103	1.91994	10	2	0.03704	0	0.0306925	-0.043382	1.34037	3.75716	3.36816	0.922965	0.912009	0.95858	154.099	0	Inactive	-1	-1	-1
1622	CHEMBL337821	2.13555	12	1	0.06522	0	0.0231608	-0.0269638	1.37767	3.57553	3.23023	0.674184	0.873572	1.14361	150.384	0	Inactive	-1	-1	-1
1623	CHEMBL215692	1.89451	6	0	0.02381	0	0.0339532	-0.072084	1.15773	3.6065	3.29423	0.565469	0.864429	0.70538	154.854	0	Inactive	-1	1	-1
1624	CHEMBL560015	2.03126	13	2	0.01852	0	0.0275599	-0.100872	1.3035	3.74748	3.47849	0.884959	0.826555	1.06283	153.766	0.0179877	Inactive	-1	-1	-1
1625	CHEMBL138158	1.88889	5	2	0.05556	0	0.0302372	0.082161	1.4538	3.45441	3.19706	0.689055	0.860218	0.72786	159.404	0	Inactive	-1	-1	-1
1626	CHEMBL1822438	2.06169	11	1	0.03226	0	0.0268311	-0.111378	1.32709	3.82147	3.73584	1.0293	1.04721	1.02717	152.404	0.0169997	Inactive	-1	-1	-1
1627	CHEMBL3785173	2.08782	16	0	0	0	0.0213556	0.0173039	1.35117	3.67582	3.38595	0.918544	1.0508	0.92884	148.338	0	Inactive	-1	-1	-1
1628	CHEMBL2408424	1.89968	9	0	0	0	0.0307844	0.217025	1.65554	3.75544	3.34763	0.825263	0.968077	0.83502	150.55	0	Inactive	-1	1	-1
1629	CHEMBL118916	2.13649	9	2	0	0	0.0229352	-0.117003	1.14645	3.44282	3.27398	0.843514	0.663089	0.9038	151.921	0	Inactive	-1	-1	-1
1630	CHEMBL1927479	1.90194	9	0	0.05	0	0.0262247	-0.110197	1.29835	3.47454	3.15305	0.654041	0.8967	0.95372	149.046	0	Inactive	-1	-1	-1
1631	CHEMBL45225	1.96794	12	1	0.04	0	0.0315753	0.0210755	1.2928	3.69284	3.39733	0.812438	0.952012	0.82336	151.846	0	Inactive	-1	-1	-1
1632	CHEMBL284059	1.86183	12	0	0.06818	0	0.026687	0.0775219	1.53075	3.74909	3.35242	0.766056	1.00399	0.9109	154.701	0	Inactive	-1	1	-1
1633	CHEMBL1236	1.96577	11	1	0.01852	0	0.0272176	-0.135681	1.39466	3.65094	3.40645	0.910428	0.999076	0.95127	150.478	0	Inactive	-1	-1	-1
1634	CHEMBL191640	2.01401	13	0	0.06	0	0.0268166	-0.175699	1.27337	3.65559	3.46575	0.768173	0.925707	1.05106	152.683	0.00849986	Inactive	-1	1	-1
1635	CHEMBL56556	1.99478	7	0	0	0	0.0283945	-0.0600809	1.15332	3.542	3.44107	0.930196	1.02378	0.80872	152.636	0	Inactive	-1	-1	-1
1636	CHEMBL446918	2.06957	12	0	0	0	0.0221713	-0.159201	1.38283	3.61454	3.1602	0.806378	0.904687	0.95914	145.403	0	Inactive	-1	-1	-1
1637	CHEMBL249645	1.97096	9	2	0	0	0.0232547	-0.112426	1.17581	3.52714	3.47415	0.722306	0.880025	0.83385	154.088	0	Inactive	-1	-1	-1
1638	CHEMBL484618	2.00331	12	1	0.04545	0	0.0284723	-0.138037	1.16895	3.80104	3.55876	0.784831	0.852813	0.99833	157.174	0	Inactive	-1	1	-1
1639	CHEMBL1774693	1.93556	17	1	0.06667	0	0.0221806	-0.00202197	1.56756	3.80674	3.61738	0.58587	0.801493	1.14366	151.524	0	Inactive	-1	-1	-1
1640	CHEMBL1774614	2.11421	17	0	0	0	0.0213925	-0.0623413	1.47587	3.79167	3.37039	0.838944	0.862986	1.07146	145.715	0	Inactive	-1	-1	-1
1641	CHEMBL7721	2.08202	12	0	0.08333	0	0.0270351	-0.0538031	1.52673	3.44005	2.92345	0.688774	0.887436	1.07288	142.481	0.015861	Inactive	-1	1	-1
1642	CHEMBL146192	1.9014	13	2	0.09091	0	0.0223784	-0.2752	1.21681	3.45975	3.193	0.766176	0.853079	1.06184	153.187	0	Inactive	-1	-1	-1
1643	CHEMBL15160	2.09074	15	3	0.05769	0	0.0241448	-0.219556	1.2078	3.54234	3.35643	0.879158	0.736325	1.09059	150.387	0	Inactive	-1	-1	-1
1644	CHEMBL126652	1.87585	7	0	0	0	0.0221971	-0.0615098	1.05618	3.3157	2.85805	0.679184	0.979618	0.84328	148.093	0	Inactive	-1	-1	-1
1645	CHEMBL3262097	1.98414	13	0	0	0	0.0246067	0.000704	1.32292	3.93449	3.8163	0.859029	0.972512	1.15208	154.172	0	Inactive	-1	-1	-1
1646	CHEMBL1269515	1.92328	5	0	0.02632	1.3076	0.024823	0.174021	1.65872	3.51155	3.2075	0.410255	0.742033	0.71522	155.687	0.0728931	Inactive	-1	-1	-1
1647	CHEMBL1097722	1.97162	11	2	0.01429	0	0.0320178	0.13375	1.22551	3.75698	3.69562	0.894538	1.01607	1.01001	155.582	0.0190063	Inactive	-1	-1	-1
1648	CHEMBL366607	1.97337	22	0	0.02381	0	0.0247645	0.0155857	1.49022	3.90004	3.79021	0.824646	1.04559	1.35927	145.077	0	Inactive	-1	-1	-1
1649	CHEMBL3601693	1.89792	19	2	0.05769	0	0.0213823	-0.0509581	1.5581	3.80099	3.42529	0.65008	1.02099	1.07519	142.177	0	Inactive	-1	-1	-1
1650	CHEMBL2381686	1.92989	5	0	0.03846	0	0.0226488	-0.14441	0.982424	3.31736	2.86567	0.801499	0.839021	0.83752	153.606	0	Inactive	-1	-1	-1
1651	CHEMBL219444	1.96301	13	0	0.04	0	0.0208933	0.00537413	1.74074	3.8212	3.34875	0.657576	0.956517	1.11099	147.521	0	Inactive	-1	-1	-1
1652	CHEMBL27759	1.94786	7	0	0.02174	0	0.0208458	0.108942	1.33246	3.64613	3.43033	0.911791	1.06694	0.96632	155.314	0	Inactive	-1	-1	-1
1653	CHEMBL549983	2.016	12	0	0.0303	0	0.0294157	-0.109467	1.16058	3.80197	3.56392	0.797633	0.794577	0.96826	158.992	0	Inactive	-1	-1	-1
1654	CHEMBL3758459	1.94912	9	0	0.02632	0	0.0366007	-0.0462369	1.17519	3.49749	3.19719	0.780124	0.779669	0.80239	154.452	0	Inactive	-1	-1	-1
1655	CHEMBL1835167	1.82058	5	2	0.02381	1.65096	0.0290304	0.143155	1.19442	3.53398	3.30757	0.730532	0.939929	0.82586	166.091	0.00449958	Inactive	-1	-1	-1
1656	CHEMBL425990	2.0303	10	0	0.03571	0	0.0256068	0.0737166	1.39268	3.81397	3.50241	0.732437	0.857547	0.94357	151.458	0	Inactive	-1	-1	-1
1657	CHEMBL2316617	1.8576	11	0	0.02273	0	0.026326	-0.0532966	1.23656	3.6337	3.36727	0.952014	1.12572	0.89692	154.07	0	Inactive	-1	-1	-1
1658	CHEMBL315647	2.10393	12	2	0.03571	0	0.0226569	-0.210268	1.30114	3.73033	3.37654	0.809558	0.806139	1.15533	150.238	0	Inactive	-1	1	-1
1659	CHEMBL3601830	1.92654	12	1	0.02	0	0.0273156	0.0754047	1.40732	3.77101	3.43634	0.898579	1.03628	0.89551	150.263	0	Inactive	-1	-1	-1
1660	CHEMBL1506653	1.97182	10	2	0.04348	0	0.0235051	-0.199658	1.233	3.50514	3.27851	0.806764	0.724247	0.98927	155.17	0	Inactive	-1	-1	-1
1661	CHEMBL519836	1.90517	19	0	0.08621	0	0.0241142	-0.113391	1.45607	3.86116	3.49195	0.676564	1.02833	1.16698	148.088	0	Inactive	-1	-1	-1
1662	CHEMBL474572	1.87198	11	0	0.06	0	0.0247635	0.0440414	1.37608	3.65444	3.37981	0.620525	0.897096	1.02262	152.557	0	Inactive	-1	1	-1
1663	CHEMBL303106	1.85008	5	2	0.02381	0	0.0283161	-0.0771131	1.25055	3.51928	3.17251	0.874566	0.985347	0.7701	152.571	0	Inactive	-1	1	-1
1664	CHEMBL368642	2.07763	8	0	0.02273	0	0.0332322	0.0378586	1.17656	3.65348	3.36976	0.787114	0.963724	0.82542	152.416	0.0073611	Inactive	-1	1	-1
1665	CHEMBL490533	2.09581	15	2	0.04167	0	0.0249165	-0.204849	1.20289	3.53031	3.33432	0.895479	0.813889	1.05996	147.784	0	Inactive	-1	-1	-1
1666	CHEMBL1214819	1.84372	6	1	0.03704	0	0.0243858	0.0188897	1.22309	3.764	3.58162	0.833215	1.02303	0.87307	157.003	0.0555556	Inactive	-1	-1	-1
1667	CHEMBL2262110	1.94844	10	1	0.0303	0	0.0353238	-0.0284679	1.31444	3.82356	3.67164	0.785413	0.977351	0.99989	153.976	0.00849986	Inactive	-1	-1	-1
1668	CHEMBL1834940	1.91934	12	0	0.22727	0	0.057136	-0.16607	2.69181	3.01119	2.92453	0.803127	0.656413	0.92918	137.645	0	Inactive	-1	-1	-1
1669	CHEMBL1928846	2.00728	11	1	0.07692	0	0.0196446	-0.0127295	1.22426	3.62596	3.26322	0.644974	0.789324	1.09278	152.516	0	Inactive	-1	-1	-1
1670	CHEMBL486382	1.8321	4	0	0	0	0.0304143	-0.240863	0.99298	3.41573	3.14444	0.886134	0.967676	0.76617	160.413	0	Inactive	-1	-1	-1
1671	CHEMBL3218338	2.03303	6	1	0.01852	1.18432	0.0226261	0.0478824	1.28091	3.65486	3.42557	0.770268	0.853694	0.91536	160.576	0.05	Inactive	-1	-1	-1
1672	CHEMBL1213983	1.97829	13	0	0	0	0.0238129	-0.0305322	1.37853	3.73786	3.29518	0.944347	1.1646	0.97512	148.779	0	Inactive	-1	-1	-1
1673	CHEMBL161757	1.96277	6	0	0.07895	0	0.0246964	-0.0829395	1.20156	3.50105	3.07452	0.663934	0.908228	0.90757	154.219	0	Inactive	-1	-1	-1
1674	CHEMBL1939734	1.97401	6	1	0	0	0.029513	-0.11826	1.07236	3.50835	3.37663	0.923913	0.859995	0.76739	155.56	0	Inactive	-1	-1	-1
1675	CHEMBL339049	1.70179	0	0	0	1.3008	0.0418065	0.0498952	1.04448	3.64862	3.37443	0.996656	1.31371	0.54196	158.884	0.0456435	Inactive	-1	-1	-1
1676	CHEMBL1774687	1.7802	0	0	0	0	0.0747066	-0.0221843	1.28857	3.67655	3.59407	0.813267	0.92695	0.53115	159.732	0	Inactive	-1	-1	-1
1677	CHEMBL418044	1.98233	1	3	0	8.38131	0.0457085	-0.142167	0.974112	3.69892	3.53818	0.883937	1.12274	0.45568	154.451	0.273125	Inactive	-1	-1	-1
1678	CHEMBL2437277	1.88615	5	2	0.02941	0	0.0485508	-0.0821677	1.54099	3.38837	3.00302	0.719243	0.960917	0.87624	156.047	0	Inactive	-1	-1	-1
1679	CHEMBL1796551	2.1464	13	0	0.04545	0	0.0236042	-0.0938213	1.42761	3.61782	3.28339	0.719326	0.883973	1.13235	143.091	0.015861	Inactive	-1	1	-1
1680	CHEMBL42527	1.87866	5	4	0.02778	3.08921	0.029911	0.0173656	1.3484	3.33096	2.98154	0.668813	1.09113	0.56945	151.672	0	Inactive	-1	-1	-1
1681	CHEMBL578973	2.01595	18	0	0.03571	0	0.0321826	-0.0511106	1.72242	3.82353	3.50885	0.814418	0.970119	1.13087	139.427	0	Inactive	-1	-1	-1
1682	CHEMBL1214033	1.9605	9	0	0.02174	0	0.0322425	0.0503011	1.09491	3.57394	3.39433	1.03043	0.737954	0.88383	159.851	0	Inactive	-1	-1	-1
1683	CHEMBL2374204	1.90651	5	1	0.02632	0	0.0347838	-0.188743	1.47247	3.29095	3.15998	0.910489	0.950804	0.79534	151.96	0	Inactive	-1	-1	-1
1684	CHEMBL53982	1.97171	7	1	0.05172	0	0.0407716	-0.201696	1.45667	3.77322	3.42054	0.939482	0.964344	0.88809	156.422	0	Inactive	-1	-1	-1
1685	CHEMBL56254	1.95111	11	2	0.03333	0	0.0259295	0.0136341	1.21593	3.67797	3.52268	0.909303	1.07541	0.86816	156.362	0	Inactive	-1	-1	-1
1686	CHEMBL489179	2.11158	14	0	0.02	0	0.0207654	-0.108894	1.40861	3.53715	3.42204	0.741843	0.915682	1.12909	142.193	0	Inactive	-1	-1	-1
1687	CHEMBL1951004	1.77104	5	4	0	2.91876	0.0224287	0.165945	1.32679	3.28549	2.81783	0.86322	1.26332	0.55364	151.673	0	Inactive	-1	-1	-1
1688	CHEMBL1171969	1.89297	5	0	0.02941	0	0.0343101	0.0191864	1.2957	3.55497	3.00447	0.929069	1.15843	0.83634	151.159	0	Inactive	-1	-1	-1
1689	CHEMBL224434	1.949	10	2	0	0	0.0222524	-0.17489	1.30813	3.5096	3.32228	0.80188	0.793112	0.93927	152.466	0	Inactive	-1	-1	-1
1690	CHEMBL41092	2.11047	11	0	0	0	0.0302279	-0.0451963	1.49617	3.46592	2.92744	0.789994	0.896284	0.94278	144.535	0.0169997	Inactive	-1	-1	-1
1691	CHEMBL3581840	1.96283	14	0	0.02632	0	0.021729	-0.0207079	1.43185	3.5024	3.12388	0.815455	1.0792	1.00672	143.125	0	Inactive	-1	-1	-1
1692	CHEMBL218530	1.99749	14	0	0.03226	0	0.0228876	-0.199454	1.29882	3.91081	3.46652	0.691561	0.884313	1.13043	153.53	0	Inactive	-1	-1	-1
1693	CHEMBL423698	1.95088	12	2	0.08696	0	0.0276199	-0.158286	1.31005	3.5326	3.20291	0.609965	0.6104	1.00708	150.752	0	Inactive	-1	-1	-1
1694	CHEMBL1807751	1.95181	9	0	0.04167	0	0.0194368	0.0457921	1.75586	3.81009	3.3271	0.661071	0.89075	1.10399	149.513	0	Inactive	-1	-1	-1
1695	CHEMBL3343683	2.0466	12	0	0.04167	0	0.0269431	0.0534785	1.54867	3.64005	3.37566	0.549075	0.767451	1.01581	145.655	0	Inactive	-1	-1	-1
1696	CHEMBL2437288	2.06058	13	0	0.03448	0	0.0232561	-0.102576	1.7452	3.81538	3.64322	0.589829	0.729727	1.29403	150.022	0.0141865	Inactive	-1	-1	-1
1697	CHEMBL445676	1.98222	12	1	0.06	0	0.0312487	-0.0368427	1.28777	3.64241	3.40209	0.707251	0.881395	0.84724	151.436	0	Inactive	-1	1	-1
1698	CHEMBL1951001	2.00148	9	0	0.02083	0	0.0259754	-0.0325197	1.12185	3.69167	3.52296	0.98162	1.0367	0.75368	158.074	0	Inactive	-1	1	-1
1699	CHEMBL60085	1.84947	8	1	0.02632	0	0.0306359	0.0445274	1.1378	3.5816	3.16517	1.13566	1.12366	0.78571	154.638	0	Inactive	-1	-1	-1
1700	CHEMBL1272228	1.89581	13	3	0.06	0	0.0257003	-0.14223	1.23859	3.60062	3.42477	0.949826	0.932702	0.93043	153.22	0	Inactive	-1	1	-1
1701	CHEMBL2316655	1.93967	11	0	0.02083	0	0.0344182	0.0184455	1.31565	3.76246	3.42841	0.982998	1.07003	0.87113	152.335	0	Inactive	-1	-1	-1
1702	CHEMBL557107	1.99832	17	0	0.04412	0	0.0350787	-0.0762958	1.46062	3.83266	3.59574	0.757674	0.91743	1.01035	148.184	0	Inactive	-1	1	-1
1703	CHEMBL1668540	1.9185	10	0	0	0	0.0373929	0.000697	1.44069	3.73726	3.57093	0.880513	0.87113	0.90523	153.62	0	Inactive	-1	-1	-1
1704	CHEMBL2261402	2.025	14	0	0.0303	0	0.0303392	-0.0386208	1.28752	3.69555	3.65265	0.966446	1.07202	0.85124	150.377	0	Inactive	-1	-1	-1
1705	CHEMBL429476	1.98211	10	0	0.04	0	0.0419018	-0.123602	1.31686	3.65123	3.45376	0.970714	1.04499	0.86599	149.492	0	Inactive	-1	-1	-1
1706	CHEMBL3298963	1.95316	21	0	0.02632	0	0.0259161	-0.0466607	1.43857	3.89967	3.78888	0.84919	1.04738	1.21868	146.934	0	Inactive	-1	-1	-1
1707	CHEMBL1760522	2.0798	11	0	0.07895	0	0.0247642	0.00537037	1.23186	3.4894	3.10856	0.696142	0.924035	1.09045	146.36	0.015861	Inactive	-1	-1	-1
1708	CHEMBL514620	1.94685	16	0	0.03125	0	0.0292146	0.0397362	1.44698	3.80172	3.69889	0.793025	0.87317	1.11617	153.256	0	Inactive	-1	-1	-1
1709	CHEMBL1927486	1.96875	9	0	0.04348	1.60544	0.0294672	0.0349095	1.22844	3.60362	3.32316	0.562837	0.74815	0.88174	150.175	0.0833333	Inactive	-1	-1	-1
1710	CHEMBL211066	2.12686	11	0	0	5.75154	0.0382222	-0.0301442	1.25843	3.81211	3.62615	1.03369	1.08485	0.72983	148.606	0.0395285	Inactive	-1	-1	-1
1711	CHEMBL1761008	2.04387	10	0	0.02273	0	0.0267944	-0.0336745	1.26485	3.66652	3.32933	1.08345	1.34894	1.05283	148.297	0.0212344	Inactive	-1	-1	-1
1712	CHEMBL1928842	2.02236	9	0	0.02174	0	0.0318802	0.00672918	1.52619	3.57666	3.41482	0.981246	1.10727	0.85639	148.996	0	Inactive	-1	-1	-1
1713	CHEMBL1796417	1.92752	14	4	0.06667	0	0.0266198	-0.0696862	1.61366	3.85581	3.47077	0.620895	0.78694	0.96066	149.464	0	Inactive	-1	-1	-1
1714	CHEMBL389398	1.89369	13	1	0.09524	0	0.0227669	-0.195336	1.24904	3.45328	3.13747	0.768289	1.00688	1.05806	147.072	0	Inactive	-1	-1	-1
1715	CHEMBL1214100	1.90146	13	1	0.075	0	0.023076	-0.257282	1.29299	3.4592	3.12339	0.770813	0.966569	1.01732	150.01	0	Inactive	-1	-1	-1
1716	CHEMBL1089374	2.04119	13	0	0.025	0	0.0214388	-0.11732	1.29626	3.59751	3.1573	0.811159	0.970539	1.00064	145.179	0	Inactive	-1	-1	-1
1717	CHEMBL1214553	2.00021	10	0	0	0	0.0216057	-0.0887388	1.34177	3.47837	3.12409	0.727576	0.731978	0.89325	149.207	0	Inactive	-1	-1	-1
1718	CHEMBL2408998	1.97675	6	0	0	0	0.0345675	-0.104162	1.08233	3.55369	3.28851	0.991255	1.00303	0.66579	152.167	0	Inactive	-1	-1	-1
1719	CHEMBL2059372	2.10944	15	1	0.01852	0	0.0246042	-0.130677	1.33601	3.74589	3.58393	0.989301	0.925369	0.97631	150.926	0	Inactive	-1	-1	-1
1720	CHEMBL1822424	1.98086	16	2	0.01163	0	0.0251195	-0.0356872	1.30311	3.91515	3.82642	0.886242	0.836248	1.12913	155.365	0	Inactive	-1	-1	-1
1721	CHEMBL252726	2.01599	11	1	0	0	0.0309481	-0.0351955	1.28947	3.79906	3.45592	1.04874	0.935137	0.80919	152.959	0	Inactive	-1	-1	-1
1722	CHEMBL1091436	1.94382	12	2	0.01724	0	0.0203994	-0.107587	1.32608	3.69361	3.51225	0.853356	0.976241	1.08419	152.887	0	Inactive	-1	-1	-1
1723	CHEMBL238442	1.94678	13	0	0.05172	0	0.0271454	0.0305144	1.39153	3.6581	3.58419	0.759032	1.00553	0.98559	148.727	0	Inactive	-1	1	-1
1724	CHEMBL1812342	1.974	12	0	0.06897	0	0.0403113	-0.141344	1.43801	3.70886	3.46466	0.777005	0.973997	0.93375	149.88	0	Inactive	-1	1	-1
1725	CHEMBL1224166	1.81683	5	1	0	0	0.0408923	-0.0653634	0.890388	3.45511	3.1556	1.17065	1.06416	0.56828	159.706	0	Inactive	-1	-1	-1
1726	CHEMBL505	1.94731	9	0	0.02381	0	0.0355002	0.0770399	1.21045	3.55192	3.35116	0.80456	0.764219	0.85399	155.311	0	Inactive	-1	-1	-1
1727	CHEMBL1214299	1.90742	18	0	0	0	0.019623	0.0290499	1.59061	3.8382	3.72398	0.870909	1.05442	1.09933	148.806	0	Inactive	-1	-1	-1
1728	CHEMBL335478	1.88264	14	2	0	0	0.0263963	0.0353081	1.23161	3.85807	3.72721	0.880958	1.0511	1.06373	155.497	0	Inactive	-1	-1	-1
1729	CHEMBL226715	1.90696	10	1	0.02778	0	0.0245613	-0.257225	1.29807	3.44061	3.1046	0.942618	0.910613	0.93345	149.696	0	Inactive	-1	-1	-1
1730	CHEMBL108661	1.9295	15	0	0	0	0.024403	-0.0163076	1.3034	3.62229	3.35345	0.761938	1.15479	1.1698	145.32	0	Inactive	-1	-1	-1
1731	CHEMBL134305	1.91497	13	4	0	0	0.0236559	-0.0290452	1.42361	3.85469	3.4821	0.938024	0.998593	0.932	149.785	0	Inactive	-1	-1	-1
1732	CHEMBL3104738	1.918	13	2	0.02083	0	0.0236592	-0.0712733	1.36728	3.75763	3.52169	0.95547	1.0299	0.91861	152.996	0	Inactive	-1	-1	-1
1733	CHEMBL301572	2.10682	14	0	0	0	0.0220078	-0.125084	1.40702	3.45745	3.08743	0.86274	1.03545	0.89745	143.957	0	Inactive	-1	-1	-1
1734	CHEMBL475144	1.87669	10	1	0	0	0.0272707	0.0484245	1.2589	3.87094	3.69341	0.996574	1.20909	1.08562	156.239	0	Inactive	-1	-1	-1
1735	CHEMBL2012826	1.95799	11	1	0.03846	0	0.0254885	-0.0628918	1.24862	3.59163	3.48997	0.733829	0.985798	0.8951	154.966	0	Inactive	-1	-1	-1
1736	CHEMBL521538	1.86841	5	0	0.02273	0	0.0474961	-0.155997	1.05118	3.64162	3.34549	0.882838	0.923299	0.55841	162.529	0	Inactive	-1	-1	-1
1737	CHEMBL473535	1.98912	8	0	0.02083	0	0.0277041	0.0808656	1.27631	3.75904	3.38587	0.728012	0.916461	0.86992	156.145	0	Inactive	-1	1	-1
1738	CHEMBL602226	1.97671	7	1	0.06522	0	0.0315209	0.0270669	1.27737	3.56776	3.40525	0.661017	0.795337	0.71434	157.263	0	Inactive	-1	-1	-1
1739	CHEMBL1289336	1.98622	12	3	0.07813	0	0.0317173	-0.19496	1.27048	3.71455	3.45805	0.925536	0.888071	1.0093	155.51	0	Inactive	-1	1	-1
1740	CHEMBL203118	1.97845	11	0	0.02632	0	0.0221551	-0.154295	1.43776	3.44475	3.12195	0.588778	0.677643	0.92141	147.744	0	Inactive	-1	-1	-1
1741	CHEMBL1761036	1.87486	11	0	0.06	0	0.0272554	0.0807358	1.32218	3.66109	3.40393	0.635505	0.779631	0.95285	155.941	0	Inactive	-1	1	-1
1742	CHEMBL1803102	1.81863	6	1	0.02273	0	0.0316665	-0.0591041	1.13816	3.61867	3.35875	1.02556	1.16614	0.72092	157.639	0	Inactive	-1	1	-1
1743	CHEMBL1812339	1.9009	7	0	0.05882	0	0.0325116	0.059299	1.31222	3.79903	3.63581	0.820123	1.03956	0.84361	158.415	0	Inactive	-1	1	-1
1744	CHEMBL2035991	1.82653	5	2	0.02083	1.83657	0.0356141	-0.00350857	1.20247	3.63449	3.36581	0.802519	1.03218	0.75212	163.591	0.00449958	Inactive	-1	-1	-1
1745	CHEMBL297453	1.98294	10	0	0.05	0	0.0307375	-0.0688494	1.38564	3.62461	3.15866	0.875023	1.06402	0.93799	144.997	0	Inactive	-1	-1	-1
1746	CHEMBL1289924	2.06444	8	4	0.07692	0	0.0284443	-0.254646	1.21556	3.54535	3.25531	0.910037	0.664993	0.88359	156.938	0	Inactive	-1	1	-1
1747	CHEMBL589733	1.84092	4	0	0	0	0.0390689	-0.177939	1.01633	3.36483	3.20882	1.00895	1.12093	0.61385	159.485	0	Inactive	-1	-1	-1
1748	CHEMBL218333	1.87754	11	1	0.05	0	0.0298575	-0.271345	1.28806	3.65553	3.18579	0.73613	0.892034	0.83937	147.07	0	Inactive	-1	-1	-1
1749	CHEMBL1172805	2.02053	8	1	0.02632	0	0.0293678	0.0651068	1.08959	3.4893	3.35889	1.01779	1.07863	0.7235	153.727	0	Inactive	-1	-1	-1
1750	CHEMBL484527	1.96476	7	1	0.05	0	0.0295614	-0.14626	1.01607	3.47851	3.30766	0.765537	0.865939	0.71108	157.905	0	Inactive	-1	-1	-1
1751	CHEMBL538577	1.97768	11	1	0.02381	1.5293	0.0211911	0.164437	2.10045	3.51364	3.1429	0.403496	0.790179	0.93046	147.877	0.0728931	Inactive	-1	-1	-1
1752	CHEMBL494606	2.09083	3	0	0	13.4182	0.0420297	-0.147378	1.00935	3.7378	3.54746	0.855169	1.00551	0.3944	150.903	0.575152	Inactive	-1	-1	-1
1753	CHEMBL2437279	1.97155	13	0	0.02381	0	0.0267042	-0.0751644	1.38679	3.7159	3.20238	0.738006	0.998615	0.91947	148.013	0	Inactive	-1	1	-1
1754	CHEMBL54714	2.06209	16	0	0.04839	0	0.0267217	-0.0530208	1.43605	3.77425	3.55633	0.667272	0.796214	1.03889	151.182	0	Inactive	-1	1	-1
1755	CHEMBL1951010	1.87292	12	0	0	0	0.0196296	-0.079629	1.51623	3.47786	3.20695	0.72216	0.996908	1.00289	144.116	0	Inactive	-1	-1	-1
1756	CHEMBL3221786	2.00532	16	2	0	6.21324	0.0244135	0.019242	1.38487	3.78211	3.75364	0.933509	1.06526	1.15594	150.826	0.0255155	Inactive	-1	-1	-1
1757	CHEMBL1929350	2.01263	18	0	0.03226	0	0.0310528	-0.0796791	1.73659	3.83989	3.53907	0.791066	0.970443	1.24587	140.66	0	Inactive	-1	-1	-1
1758	CHEMBL115433	1.98258	5	4	0	0	0.024652	-0.0657889	1.22877	3.55265	3.4448	0.799432	0.834514	0.86122	154.658	0	Inactive	-1	-1	-1
1759	CHEMBL232480	2.14604	14	1	0.02174	0	0.0219737	0.0064177	1.30106	3.58183	3.5233	0.792829	0.95622	0.96467	148.337	0	Inactive	-1	-1	-1
1760	CHEMBL343320	2.07748	13	0	0.01613	0	0.0225855	-0.032859	1.49807	3.83186	3.63488	0.702467	0.782725	1.10326	151	0	Inactive	-1	-1	-1
1761	CHEMBL3104735	1.916	14	4	0.03571	0	0.024925	-0.0752558	1.58582	3.83644	3.4681	0.600653	0.827444	0.93098	148.312	0	Inactive	-1	-1	-1
1762	CHEMBL3262098	1.93236	7	1	0.02083	0	0.0213123	-0.0657602	1.41082	3.73654	3.37399	0.877493	0.835356	1.02082	158.215	0	Inactive	-1	-1	-1
1763	CHEMBL234898	1.94805	6	0	0	0	0.0291213	-0.122406	1.06454	3.49049	3.31078	0.903585	1.06233	0.74607	151.451	0	Inactive	-1	-1	-1
1764	CHEMBL1939604	1.91489	12	0	0.01667	0	0.0345052	-0.0748631	1.28925	3.84722	3.53904	0.821685	0.919412	0.91649	152.925	0	Inactive	-1	-1	-1
1765	CHEMBL1761025	1.97923	10	0	0.02273	1.61148	0.0244278	0.05052	1.76581	3.52267	3.27863	0.432923	0.757458	0.90441	150.315	0.0728931	Inactive	-1	-1	-1
1766	CHEMBL1761021	2.02667	13	0	0.03333	0	0.0290337	-0.156566	1.27375	3.85801	3.58108	0.850867	0.971051	1.06398	154.577	0.0161274	Inactive	-1	-1	-1
1767	CHEMBL219419	2.21246	17	0	0.01724	0	0.0205425	-0.0720837	1.55914	3.84441	3.48186	0.793514	0.954502	1.16484	143.453	0	Inactive	-1	-1	-1
1768	CHEMBL1163715	1.98806	7	1	0.02174	0	0.0197706	0.110405	1.26117	3.64413	3.33638	0.868384	0.883301	0.98301	156.714	0	Inactive	-1	-1	-1
1769	CHEMBL611636	1.90385	13	2	0.025	0	0.0246208	-0.228808	1.48344	3.48739	3.16459	0.7145	0.818681	0.92801	146.077	0	Inactive	-1	-1	-1
1770	CHEMBL219395	2.05959	14	0	0	0	0.0221933	0.0719491	1.318	3.67515	3.38859	0.941621	1.07556	0.85838	149.716	0	Inactive	-1	-1	-1
1771	CHEMBL2089271	2.03627	16	0	0.01724	0	0.0256186	-0.0168008	1.49643	3.76802	3.49145	0.569364	0.836435	1.00497	146.01	0	Inactive	-1	-1	-1
1772	CHEMBL3769947	1.89916	10	0	0	0	0.0397544	0.066819	1.06202	3.69316	3.43825	1.13897	0.971945	0.75999	157.607	0	Inactive	-1	-1	-1
1773	CHEMBL216926	1.96714	13	1	0.03846	0	0.0301177	-0.143009	1.42585	3.787	3.33401	0.77065	0.85623	0.88199	152.377	0	Inactive	-1	1	-1
1774	CHEMBL29292	1.95659	8	4	0	1.57835	0.0233809	-0.0222253	1.10046	3.59358	3.44753	0.804261	0.934089	0.73816	152.145	0.0833333	Inactive	-1	-1	-1
1775	CHEMBL2437281	2.00995	10	0	0.02381	1.80255	0.0253649	-0.0260665	1.48179	3.59469	3.28886	0.731498	0.92493	1.06472	158.157	0.0129994	Inactive	-1	-1	-1
1776	CHEMBL3601697	1.99995	12	2	0.01563	0	0.0243622	-0.0963075	1.48806	3.74217	3.65006	0.773226	0.828752	1.02834	154.937	0	Inactive	-1	-1	-1
1777	CHEMBL3581812	1.97975	11	0	0.04545	1.41257	0.0235327	0.0431898	2.02747	3.51643	3.18791	0.425333	0.721825	0.94059	148.642	0.0728931	Inactive	-1	-1	-1
1778	CHEMBL556258	1.82532	5	1	0	0	0.0317258	0.00919949	1.1321	3.60136	3.33341	0.975109	1.21515	0.85793	158.073	0	Inactive	-1	-1	-1
1779	CHEMBL1796427	1.91809	13	4	0	0	0.0266242	-0.0865147	1.3022	3.86953	3.49735	0.975037	1.04132	0.87035	151.006	0	Inactive	-1	-1	-1
1780	CHEMBL148195	1.82424	5	0	0	1.48516	0.0392335	-0.0199925	1.0662	3.68099	3.42118	0.971808	1.18754	0.72622	155.971	0.0456435	Inactive	-1	1	-1
1781	CHEMBL1951763	2.06531	11	1	0.06	0	0.0266616	0.0190291	1.30931	3.70238	3.42699	0.760781	0.922548	0.81617	152.781	0	Inactive	-1	-1	-1
1782	CHEMBL3262117	1.98817	13	0	0.0303	0	0.0239997	-0.0939928	1.27505	3.9213	3.50591	0.678299	0.872487	1.09937	153.968	0	Inactive	-1	-1	-1
1783	CHEMBL2431510	1.96586	13	1	0.01429	0	0.0238511	-0.00375733	1.30293	3.83891	3.62734	0.889516	1.01575	1.12675	154.625	0.00849986	Inactive	-1	-1	-1
1784	CHEMBL434563	1.9762	11	1	0.03333	1.69101	0.022301	-0.171386	1.26672	3.72457	3.54675	0.709385	0.826439	1.13708	158.306	0.00389675	Inactive	-1	1	-1
1785	CHEMBL2408993	1.87859	5	0	0.02273	0	0.0392809	-0.11486	1.12907	3.70935	3.37073	0.825883	0.867134	0.74027	163.122	0	Inactive	-1	-1	-1
1786	CHEMBL1939611	1.99856	11	1	0	0	0.0283743	-0.0412269	1.29806	3.8084	3.46313	0.968768	0.937149	0.9005	152.239	0	Inactive	-1	-1	-1
1787	CHEMBL1214757	1.89155	13	0	0.01852	1.91857	0.0246588	0.0870866	1.435	3.82738	3.509	0.819932	0.976927	0.9867	153.338	0.0645497	Inactive	-1	-1	-1
1788	CHEMBL528437	1.95015	16	0	0.02	0	0.0208481	-0.118917	1.55056	3.81504	3.43563	0.802162	1.02418	1.12397	149.939	0	Inactive	-1	1	-1
1789	CHEMBL1761042	1.8485	7	0	0.05556	0	0.0200812	0.067021	1.41898	3.73487	3.47794	0.681889	0.90016	0.93441	159.4	0	Inactive	-1	1	-1
1790	CHEMBL218438	2.09479	12	0	0	0	0.0247734	-0.105935	1.19991	3.63187	3.3687	0.925198	1.07664	0.99425	146.477	0	Inactive	-1	-1	-1
1791	CHEMBL113708	1.96182	10	1	0.01852	0	0.0352284	-0.0277919	1.27431	3.77879	3.53434	0.857051	0.897338	0.86713	156.295	0	Inactive	-1	-1	-1
1792	CHEMBL496321	1.95708	10	0	0.02174	5.01919	0.03897	-0.0522447	1.14421	3.75349	3.35773	0.810257	0.895091	0.70082	151.755	0.0294628	Inactive	-1	-1	-1
1793	CHEMBL486080	1.94548	16	0	0.02778	0	0.0307672	0.0540465	1.38363	3.80206	3.72578	0.833082	0.837104	1.106	156.509	0	Inactive	-1	1	-1
1794	CHEMBL546607	1.9248	3	3	0	3.83484	0.0397329	-0.0861778	1.07284	3.53472	3.38584	0.946227	1.17415	0.46197	156.1	0	Inactive	-1	-1	-1
1795	CHEMBL199799	1.92211	13	0	0.025	0	0.0246774	-0.118311	1.43622	3.50482	3.23811	0.766592	1.13798	1.06397	144.03	0	Inactive	-1	-1	-1
1796	CHEMBL2315081	1.97368	16	2	0	0	0.0257482	-0.067207	1.33666	3.90528	3.82553	0.917285	0.939752	1.08789	152.801	0	Inactive	-1	-1	-1
1797	CHEMBL221235	2.07796	11	1	0.01724	0	0.0258033	-0.224923	1.29262	3.81778	3.6243	1.0336	1.00139	1.06517	152.044	0.0169997	Inactive	-1	-1	-1
1798	CHEMBL1214297	1.95632	6	0	0	0	0.0170965	-0.266525	1.07146	3.3447	3.00513	0.637693	1.05375	1.12104	154.663	0	Inactive	-1	-1	-1
1799	CHEMBL512905	2.05588	12	0	0.01923	0	0.0375775	-0.168841	1.28404	3.70266	3.61904	0.689204	0.972982	1.06259	148.342	0.0365576	Inactive	-1	1	-1
1800	CHEMBL1080433	1.92406	15	2	0.04545	0	0.0270056	-0.2068	1.16746	3.57811	3.14686	0.958604	0.889943	0.98675	149.721	0	Inactive	-1	-1	-1
1801	CHEMBL594270	1.98605	11	0	0	0	0.020429	-0.156198	1.33866	3.531	3.17895	0.65879	0.793143	1.04993	149.196	0	Inactive	-1	-1	-1
1802	CHEMBL2316618	1.8566	10	0	0.01786	0	0.0299709	0.051128	1.25756	3.77214	3.56626	1.00416	1.07109	0.85433	156.421	0	Inactive	-1	1	-1
1803	CHEMBL377818	1.91567	10	1	0.02273	0	0.0280796	-0.0321534	1.29992	3.64755	3.30924	0.941156	1.09343	0.96073	150.85	0	Inactive	-1	-1	-1
1804	CHEMBL480	1.88981	8	4	0	0	0.0210443	-0.109421	1.34432	3.4618	3.2481	0.795708	1.00996	0.89094	149.836	0	Inactive	-1	-1	-1
1805	CHEMBL1783991	1.97463	10	0	0.03846	0	0.0435208	-0.0546646	1.29394	3.66494	3.48057	0.9623	1.04835	0.8396	149.829	0	Inactive	-1	-1	-1
1806	CHEMBL1761033	1.91019	12	1	0.01923	0	0.0262743	0.0204226	1.43281	3.78547	3.43941	0.895989	0.881037	0.94577	154.812	0	Inactive	-1	-1	-1
1807	CHEMBL1835280	1.97727	16	1	0	0	0.0262377	0.113121	1.32791	3.8852	3.6953	0.87081	1.11009	1.1736	153.56	0.00981479	Inactive	-1	-1	-1
1808	CHEMBL3338913	2.11197	14	2	0.05357	0	0.0264217	-0.153661	1.31702	3.67697	3.47805	0.667044	0.74029	1.08416	149.344	0.013736	Inactive	-1	-1	-1
1809	CHEMBL419873	1.9904	11	0	0	0	0.0280938	-0.0731648	1.28996	3.80741	3.44202	0.942646	1.01331	0.90013	150.533	0	Inactive	-1	-1	-1
1810	CHEMBL257014	2.01773	16	1	0.03448	0	0.0283855	-0.0746612	1.31647	3.86485	3.57161	1.08148	1.06294	0.99516	150.662	0	Inactive	-1	-1	-1
1811	CHEMBL3771215	2.0009	7	0	0.02174	0	0.0316889	-0.166589	1.18771	3.62413	3.37342	0.821005	0.916633	0.84222	157.333	0.0161274	Inactive	-1	-1	-1
1812	CHEMBL118166	1.81901	13	3	0.07813	0	0.0168923	0.0454135	1.40068	3.78561	3.46411	0.746661	1.18808	1.22261	148.894	0	Inactive	-1	-1	-1
1813	CHEMBL340874	1.86367	6	0	0	0	0.0241332	-0.100595	0.862875	3.24297	2.80465	0.70421	1.03577	0.78854	148.768	0	Inactive	-1	-1	-1
1814	CHEMBL242739	1.993	14	1	0.03333	0	0.0214556	-0.0234537	1.26188	3.77665	3.52555	0.766009	0.998193	1.16408	144.465	0	Inactive	-1	-1	-1
1815	CHEMBL218335	1.85016	5	5	0.01786	4.29954	0.0347405	-0.138145	1.05842	3.70049	3.48621	0.916092	1.04941	0.53088	152.622	0.0793816	Inactive	-1	-1	-1
1816	CHEMBL541106	2.07265	11	0	0	1.67267	0.022794	0.136454	1.97627	3.50891	3.14168	0.395775	0.737471	0.91157	146.021	0.0728931	Inactive	-1	-1	-1
1817	CHEMBL2337379	1.9552	10	1	0.03846	0	0.0294675	-0.189718	1.33008	3.86375	3.3721	0.964089	1.02885	0.9411	152.671	0	Inactive	-1	-1	-1
1818	CHEMBL2338374	1.93115	9	0	0	0	0.030002	0.0577446	1.50916	3.62936	3.34621	0.817217	0.923313	0.86176	152.92	0	Inactive	-1	-1	-1
1819	CHEMBL388322	2.00071	10	1	0.02174	0	0.0269449	-0.066301	1.28618	3.63161	3.36064	1.07458	1.02696	0.89049	151.712	0	Inactive	-1	-1	-1
1820	CHEMBL1214883	1.91031	12	1	0.06061	0	0.023049	0.0285241	1.3106	3.84143	3.59276	0.744584	0.970368	1.12973	155.891	0.0680414	Inactive	-1	1	-1
1821	CHEMBL3221766	2.01361	6	5	0	3.1994	0.0240544	-0.136098	1.21293	3.5503	3.5004	0.810336	0.819127	0.89534	155.788	0.0429923	Inactive	-1	-1	-1
1822	CHEMBL3752486	1.90505	12	1	0.02174	2.03724	0.0245934	-0.203808	1.27053	3.5262	3.34124	0.710221	0.977597	1.00037	156.149	0.00449958	Inactive	-1	-1	-1
1823	CHEMBL2377296	1.91355	10	0	0	0	0.0312557	-0.0513997	1.14725	3.62117	3.25123	1.0583	0.988627	0.75498	153.426	0	Inactive	-1	-1	-1
1824	CHEMBL34598	1.91362	7	1	0.02941	4.15799	0.0360163	-0.0203438	1.12601	3.68622	3.61071	0.975559	1.11653	0.70312	156.058	0.0197642	Inactive	-1	-1	-1
1825	CHEMBL391105	2.09362	9	2	0.02174	0	0.0214176	-0.0287821	1.22072	3.42491	3.33515	0.767633	0.650819	1.06206	153.88	0	Inactive	-1	-1	-1
1826	CHEMBL1090717	2.09989	10	0	0	0	0.0301734	-0.0949411	1.31729	3.62369	3.34405	0.766924	0.87569	0.87188	148.806	0.0169997	Inactive	-1	-1	-1
1827	CHEMBL1173295	1.87638	10	2	0	0	0.0332067	-0.141263	1.22138	3.73262	3.65556	0.95782	0.983002	1.04936	157.22	0	Inactive	-1	-1	-1
1828	CHEMBL3344532	1.98133	11	0	0.04545	1.36267	0.0249874	-0.0198316	2.1749	3.51616	3.17649	0.507498	0.6668	0.90272	148.152	0.0728931	Inactive	-1	-1	-1
1829	CHEMBL1780014	1.96694	7	0	0.09259	0	0.0243829	-0.129595	1.28904	3.62172	3.46554	0.617235	0.805314	0.94218	162.258	0	Inactive	-1	1	-1
1830	CHEMBL91049	1.94604	9	0	0	0	0.0271639	-0.119178	1.19475	3.28711	3.01931	0.568254	0.813755	0.78328	148.912	0	Inactive	-1	-1	-1
1831	CHEMBL560829	2.0758	12	0	0.03571	0	0.0232089	-0.124346	1.76571	3.8107	3.61232	0.593915	0.713917	1.24818	148.542	0.0141865	Inactive	-1	-1	-1
1832	CHEMBL176519	1.90705	16	1	0	0	0.032666	-0.073143	1.22758	3.86929	3.72739	1.00524	1.16301	1.06935	150.882	0	Inactive	-1	-1	-1
1833	CHEMBL1278211	1.98084	7	1	0	0	0.0338118	0.0248353	1.27692	3.7916	3.53547	1.04095	1.09533	0.71194	152.933	0	Inactive	-1	-1	-1
1834	CHEMBL553649	1.95103	8	0	0.07143	0	0.0418719	0.0145182	1.99068	3.54037	3.32442	0.874384	0.81266	0.9777	147.05	0.0122858	Inactive	-1	-1	-1
1835	CHEMBL399607	2.12513	17	0	0.05556	0	0.021583	0.0240312	1.50183	3.75626	3.72711	1.03737	1.18849	1.14123	148.602	0	Inactive	-1	-1	-1
1836	CHEMBL525723	2.05075	11	0	0.03448	0	0.0245473	0.00589947	1.34289	3.75453	3.52464	0.744013	0.900584	0.88305	154.72	0	Inactive	-1	1	-1
1837	CHEMBL559733	2.0562	13	1	0.03704	0	0.0223734	-0.0899311	1.45029	3.84198	3.41198	0.629542	0.809162	1.09406	149.904	0	Inactive	-1	1	-1
1838	CHEMBL565089	2.00704	11	0	0	0	0.0210256	-0.155141	1.30744	3.68794	3.33282	0.738092	1.05777	1.07547	148.528	0	Inactive	-1	1	-1
1839	CHEMBL202599	1.98268	12	2	0.06452	0	0.0343312	-0.143917	1.23747	3.7183	3.48714	0.93627	0.962863	0.94439	153.931	0	Inactive	-1	1	-1
1840	CHEMBL1689605	2.03501	3	2	0	7.37897	0.0357838	-0.142154	1.02003	3.74926	3.50699	0.87031	1.05852	0.47798	150.049	0.193918	Inactive	-1	-1	-1
1841	CHEMBL1213047	1.96647	8	1	0.01316	0	0.032551	0.0351764	1.10476	3.74619	3.60165	0.956548	1.2009	0.86712	155.436	0	Inactive	-1	-1	-1
1842	CHEMBL279948	1.94735	12	0	0	0	0.0243274	-0.0977836	1.3218	3.57104	3.32041	0.656068	1.04061	1.1738	146.993	0	Inactive	-1	-1	-1
1843	CHEMBL521169	2.03876	10	4	0	0	0.024229	-0.0795152	1.34346	3.84312	3.50909	0.843323	0.854466	1.03778	151.164	0	Inactive	-1	-1	-1
1844	CHEMBL1760521	2.03446	7	0	0.02273	0	0.0198707	-0.122237	1.02878	3.54146	3.21733	0.570067	0.780558	0.9091	158.013	0	Inactive	-1	-1	-1
1845	CHEMBL2314392	1.98922	10	2	0	0	0.0296447	-0.146094	1.08917	3.74986	3.47874	0.786288	1.07377	0.90695	152.489	0	Inactive	-1	-1	-1
1846	CHEMBL2338377	2.0818	8	2	0	0	0.0261555	-0.040469	1.25136	3.61712	3.36178	0.910158	0.86006	0.74926	153.415	0	Inactive	-1	-1	-1
1847	CHEMBL261388	1.99384	12	1	0.01613	0	0.0241732	-0.0611696	1.52385	3.74318	3.64846	0.736303	0.883621	1.03665	154.262	0	Inactive	-1	-1	-1
1848	CHEMBL2380326	1.88718	13	1	0	0	0.0185271	-0.016371	1.43889	3.78515	3.54104	0.806181	0.947612	1.08441	153.424	0	Inactive	-1	-1	-1
1849	CHEMBL1818620	1.86135	8	4	0	0	0.02604	-0.0629189	1.17999	3.69639	3.5129	0.965052	1.15235	0.80634	153.567	0	Inactive	-1	-1	-1
1850	CHEMBL495832	1.84697	6	0	0.03846	0	0.0209889	-0.0123503	1.3576	3.69748	3.47983	0.894123	1.0168	0.90628	160.048	0	Inactive	-1	1	-1
1851	CHEMBL3581802	1.8486	11	0	0.04348	0	0.027246	-0.0765927	1.27889	3.6354	3.37272	0.735992	0.990294	0.91289	153.867	0	Inactive	-1	-1	-1
1852	CHEMBL1496	1.84407	6	0	0.05882	0	0.0276526	0.103488	1.10422	3.49407	3.09594	0.669178	1.0207	0.82007	159.701	0	Inactive	-1	-1	-1
1853	CHEMBL139086	1.90426	5	0	0.02857	0	0.0349589	0.0756993	1.33661	3.78091	3.67974	0.618738	0.838386	0.88062	160.242	0	Inactive	-1	1	-1
1854	CHEMBL269277	1.87073	9	0	0.01724	1.53626	0.0279682	0.107306	1.55902	3.82226	3.5292	0.767243	0.983721	0.99916	155.716	0.0645497	Inactive	-1	-1	-1
1855	CHEMBL1807750	2.01159	16	1	0	0	0.0285987	-0.051004	1.33203	3.85537	3.76885	0.996926	1.00487	0.98547	149.899	0	Inactive	-1	-1	-1
1856	CHEMBL1290655	1.94923	7	1	0.02941	1.89331	0.0284621	-0.0398812	1.08571	3.71657	3.58755	0.852636	1.01414	0.8569	158.68	0.0707107	Inactive	-1	-1	-1
1857	CHEMBL1950412	1.79465	5	1	0	0	0.0418595	0.0642143	1.10835	3.7167	3.39182	1.08617	1.06312	0.71911	158.88	0	Inactive	-1	-1	-1
1858	CHEMBL3338919	1.9653	12	1	0.04167	0	0.0209754	-0.0987058	1.50621	3.80426	3.33189	0.881333	0.911834	1.05611	151.587	0	Inactive	-1	-1	-1
1859	CHEMBL497841	1.87224	5	0	0.01923	0	0.0337394	-0.0959692	1.12631	3.71986	3.40971	0.75727	0.881178	0.82238	160.687	0	Inactive	-1	-1	-1
1860	CHEMBL415	1.98649	14	0	0.0625	0	0.0296755	-0.0293408	1.15703	3.73343	3.50424	0.719465	0.828034	0.94015	155.183	0	Inactive	-1	1	-1
1861	CHEMBL268559	1.92231	13	3	0.06	0	0.0233311	-0.224662	1.2115	3.51943	3.27314	0.796438	0.761307	1.13681	153.863	0	Inactive	-1	-1	-1
1862	CHEMBL91856	1.94915	13	0	0.05714	0	0.0335116	-0.0190972	1.25951	3.83338	3.60315	0.773298	1.05117	1.01286	151.922	0	Inactive	-1	1	-1
1863	CHEMBL245179	1.99785	11	1	0.05556	0	0.0255003	-0.113049	1.25035	3.74202	3.47386	0.69663	0.94243	1.05545	151.306	0	Inactive	-1	-1	-1
1864	CHEMBL219488	1.94504	16	0	0.0303	0	0.0280838	0.00495229	1.45066	3.80175	3.71152	0.799779	0.901633	1.16523	152.206	0	Inactive	-1	-1	-1
1865	CHEMBL1782669	1.98976	11	0	0.075	0	0.0234305	-0.149758	1.65525	3.48325	3.12919	0.559194	0.792307	0.96126	149.725	0	Inactive	-1	-1	-1
1866	CHEMBL1213805	1.91013	11	0	0.04348	0	0.0253957	-0.158404	1.44698	3.73508	3.34215	0.705195	0.93663	0.94568	153.118	0	Inactive	-1	-1	-1
1867	CHEMBL1796430	1.85432	5	0	0.02273	0	0.0349517	-0.0564827	1.5173	3.76487	3.25029	0.963678	1.11079	0.71788	151.872	0	Inactive	-1	-1	-1
1868	CHEMBL1761040	2.05653	20	0	0.01316	0	0.0249994	-0.0257364	1.41501	3.86761	3.8093	0.796178	0.978105	1.15967	150.801	0	Inactive	-1	-1	-1
1869	CHEMBL464300	1.98435	12	0	0	0	0.0239342	-0.0822217	1.51216	3.42973	3.0018	0.813629	0.980041	0.86287	144.612	0	Inactive	-1	-1	-1
1870	CHEMBL8102	1.91534	12	0	0.16667	0	0.0550983	-0.0883593	2.00752	2.9717	2.93414	0.685911	0.734185	0.84586	139.066	0	Inactive	-1	-1	-1
1871	CHEMBL1770927	1.9916	9	1	0	0	0.0212328	-0.211172	1.09122	3.51104	3.03907	0.598226	0.764128	0.7911	152.449	0	Inactive	-1	-1	-1
1872	CHEMBL1215461	2.00069	14	2	0.04688	0	0.0193757	-0.0274657	1.3035	3.77159	3.47713	0.65254	0.941164	1.26482	145.368	0	Inactive	-1	-1	-1
1873	CHEMBL1213852	2.07332	23	3	0.05	0	0.0225157	-0.165567	1.36424	3.88875	3.79157	0.760356	0.843567	1.22523	150.922	0	Inactive	-1	-1	-1
1874	CHEMBL398213	1.90845	6	0	0.02174	0	0.0235123	-0.0928754	1.12771	3.55297	3.35198	0.777979	0.919863	0.94241	159.287	0	Inactive	-1	1	-1
1875	CHEMBL1173515	2.13599	12	0	0.04762	0	0.023662	0.0565334	1.52556	3.54233	3.21189	0.664823	1.00907	1.11594	147.023	0	Inactive	-1	-1	-1
1876	CHEMBL172137	1.95288	7	0	0.03571	0	0.0349897	0.0635582	1.08539	3.79744	3.52187	0.949264	0.967308	0.82185	157.93	0	Inactive	-1	1	-1
1877	CHEMBL1836629	2.07785	13	0	0.01563	0	0.0222808	-0.0413228	1.47653	3.83411	3.63495	0.707766	0.778156	1.10524	151.718	0	Inactive	-1	-1	-1
1878	CHEMBL2377305	1.91664	13	1	0.02273	0	0.0254822	-0.202586	1.26764	3.52305	3.33937	0.816866	1.06963	1.02729	148.527	0	Inactive	-1	-1	-1
1879	CHEMBL389301	2.04402	12	0	0	0	0.0247084	-0.0010852	1.19875	3.57329	3.33376	0.828616	0.871637	0.85896	150.133	0	Inactive	-1	-1	-1
1880	CHEMBL1822435	1.95805	12	0	0.02381	0	0.0266597	-0.147648	1.44795	3.75477	3.21002	0.870923	1.00204	0.89817	151.86	0	Inactive	-1	-1	-1
1881	CHEMBL561003	1.93228	12	0	0	0	0.036654	0.0988807	1.38244	3.86668	3.6544	0.902916	0.938746	0.89538	152.007	0	Inactive	-1	-1	-1
1882	CHEMBL565053	1.94566	13	1	0.075	0	0.0281921	-0.243523	1.46265	3.45297	3.12005	0.635957	0.734399	0.96161	146.151	0	Inactive	-1	-1	-1
1883	CHEMBL524276	2.03579	20	1	0	0	0.0288144	-0.0566699	1.40606	3.87247	3.81853	0.93962	1.06784	1.20762	148.505	0.00981479	Inactive	-1	-1	-1
1884	CHEMBL3127944	1.97529	13	0	0.02174	0	0.0245666	-0.0777403	1.44972	3.74509	3.29622	0.736949	1.02741	0.99204	148.542	0	Inactive	-1	-1	-1
1885	CHEMBL488895	1.8796	12	2	0	0	0.0293727	0.0481374	1.19817	3.79595	3.7047	0.899745	1.16069	1.10786	154.91	0	Inactive	-1	-1	-1
1886	CHEMBL493203	1.9065	14	2	0.02564	0	0.0229294	0.056603	1.55351	3.86673	3.66661	0.730438	0.877268	1.26534	153.462	0	Inactive	-1	-1	-1
1887	CHEMBL2207695	1.92538	12	0	0	0	0.0352046	0.0359139	1.36292	3.76917	3.61661	0.888628	0.954999	0.89504	153.793	0	Inactive	-1	1	-1
1888	CHEMBL377582	1.85065	10	1	0.02	0	0.025517	-0.108178	1.20508	3.65517	3.43272	0.916603	1.06513	0.88543	154.2	0	Inactive	-1	-1	-1
1889	CHEMBL1818624	2.12964	17	0	0.0625	0	0.0224331	-0.0922763	1.61497	3.74194	3.28572	0.680926	0.85843	1.04687	147.916	0	Inactive	-1	1	-1
1890	CHEMBL3344529	1.92715	12	2	0.04348	0	0.0222291	-0.191122	1.26971	3.5121	3.25771	0.813295	0.810717	0.95818	151.712	0	Inactive	-1	-1	-1
1891	CHEMBL256064	1.91683	10	0	0.02083	0	0.0337019	0.0169318	1.48225	3.75567	3.32997	0.742663	0.953939	0.90136	150.001	0	Inactive	-1	-1	-1
1892	CHEMBL218385	2.08669	9	0	0	0	0.0255072	-0.0654857	1.19125	3.66323	3.3999	0.934238	1.06952	0.97188	149.26	0	Inactive	-1	1	-1
1893	CHEMBL3104869	1.97748	13	3	0.0625	0	0.0237504	-0.179806	1.2665	3.46525	3.40594	0.930053	0.838197	1.04998	151.292	0	Inactive	-1	-1	-1
1894	CHEMBL209787	2.02362	10	1	0.01613	0	0.0362258	-0.0215581	1.28348	3.85203	3.64812	0.595792	0.922954	0.72153	151.174	0	Inactive	-1	-1	-1
1895	CHEMBL2087252	1.93433	19	3	0.02381	0	0.022369	-0.0758944	1.31638	3.81553	3.67581	0.884723	0.93279	1.30922	154.861	0	Inactive	-1	-1	-1
1896	CHEMBL1089896	1.9593	16	0	0.03226	0	0.0307032	0.0816897	1.43586	3.80166	3.69233	0.790294	0.999693	1.07009	149.375	0	Inactive	-1	-1	-1
1897	CHEMBL1668544	1.96497	7	1	0.04762	0	0.0313204	-0.113663	1.07333	3.51465	3.36639	0.786113	0.90349	0.68983	157.615	0	Inactive	-1	-1	-1
1898	CHEMBL2262113	2.00247	6	1	0.01852	1.51762	0.0232973	0.170304	1.34623	3.76675	3.45783	0.803699	0.892837	0.89437	158.796	0.05	Inactive	-1	-1	-1
1899	CHEMBL2437280	2.03694	11	0	0.1	0	0.0321568	-0.184072	1.74504	3.54613	3.08298	0.643585	0.76239	1.00902	147.564	0.0073611	Inactive	-1	-1	-1
1900	CHEMBL1796411	1.92163	14	4	0.03571	0	0.0236596	-0.0960753	1.42855	3.85421	3.47083	0.895186	1.04293	0.93895	150.674	0	Inactive	-1	-1	-1
1901	CHEMBL593831	1.87988	8	0	0.04167	0	0.0230826	-0.00162604	1.35327	3.75408	3.3119	0.778256	0.856454	0.98266	161.638	0	Inactive	-1	-1	-1
1902	CHEMBL488663	1.88998	11	1	0.02273	0	0.0279343	0.0045768	1.47676	3.79322	3.23637	0.963886	1.20492	0.97016	150.102	0.00658396	Inactive	-1	-1	-1
1903	CHEMBL1641678	1.91251	12	0	0	0	0.0234278	-0.079897	1.33422	3.48636	3.23393	0.808314	1.13348	1.05456	146.8	0	Inactive	-1	-1	-1
1904	CHEMBL137846	2.01087	13	1	0.06522	0	0.040967	-0.110474	1.55768	3.78379	3.22465	0.8793	0.875471	0.94751	145.914	0	Inactive	-1	-1	-1
1905	CHEMBL2437289	2.04115	16	0	0	6.78619	0.0285392	0.00384069	1.33757	3.78211	3.75364	0.965801	1.06748	1.08348	150.216	0.03125	Inactive	-1	-1	-1
1906	CHEMBL1214233	2.03575	12	1	0	0	0.0308666	-0.0253272	1.30389	3.80005	3.53191	1.06831	1.00457	0.8349	152.185	0	Inactive	-1	-1	-1
1907	CHEMBL517042	2.04222	17	1	0	0	0.0279348	-0.0508475	1.36058	3.85853	3.79375	0.997771	1.00416	1.03513	149.44	0	Inactive	-1	-1	-1
1908	CHEMBL212783	1.99667	11	0	0.04688	0	0.0272968	-0.112047	1.29173	3.74845	3.48866	0.671848	0.817364	1.04645	155.548	0	Inactive	-1	1	-1
1909	CHEMBL472719	1.96372	11	0	0.025	0	0.0254001	-0.106824	1.45496	3.48942	3.31291	0.532186	0.765665	0.92936	144.435	0	Inactive	-1	-1	-1
1910	CHEMBL1780202	1.80689	6	1	0	0	0.0284209	-0.0533175	1.17643	3.57513	3.2648	0.898444	1.09498	0.86498	155.637	0	Inactive	-1	-1	-1
1911	CHEMBL551726	1.85518	6	0	0.04545	0	0.0207067	-0.0111308	1.31842	3.58846	3.34038	0.913902	0.876073	0.95201	162.282	0	Inactive	-1	-1	-1
1912	CHEMBL2262114	1.93818	9	2	0.05556	0	0.0317306	-0.0835597	1.30344	3.7609	3.32656	0.93739	0.946415	0.90159	154.381	0	Inactive	-1	-1	-1
1913	CHEMBL1821734	1.9717	13	0	0.02273	0	0.0253943	-0.152201	1.44207	3.72848	3.37672	0.717649	0.880088	1.02105	149.2	0	Inactive	-1	1	-1
1914	CHEMBL593589	1.87839	5	1	0.0303	0	0.0314889	0.0784063	1.49355	3.78096	3.70539	0.6098	0.778193	0.93356	160.887	0	Inactive	-1	1	-1
1915	CHEMBL2047185	1.95164	10	0	0.01724	0	0.030569	-0.13332	1.22886	3.78561	3.5396	0.840865	1.01286	0.89786	154.311	0	Inactive	-1	1	-1
1916	CHEMBL488293	1.95539	13	3	0.075	0	0.0245106	-0.0777967	1.30306	3.85137	3.62543	0.819495	0.83997	1.06965	160.463	0	Inactive	-1	1	-1
1917	CHEMBL256229	2.03443	14	0	0.04545	0	0.0262666	-0.117903	1.69729	3.57674	3.29317	0.606513	0.889031	1.02027	142.472	0	Inactive	-1	-1	-1
1918	CHEMBL230861	2.07577	11	1	0.05357	0	0.0265506	-0.0492923	1.25136	3.75432	3.52177	0.76719	0.858257	0.83929	156.542	0	Inactive	-1	1	-1
1919	CHEMBL3104734	1.94627	20	0	0.02778	0	0.0269867	-0.00730579	1.419	3.8826	3.78767	0.874948	1.08785	1.18815	146.738	0	Inactive	-1	-1	-1
1920	CHEMBL245416	1.77969	0	0	0	0	0.0561992	-0.0530706	1.30588	3.69004	3.57038	0.767712	0.922268	0.79636	160.119	0	Inactive	-1	-1	-1
1921	CHEMBL309339	1.97242	10	0	0	1.64622	0.0202125	-0.1588	1.37139	3.52964	3.20527	0.568396	0.719318	1.01888	157.159	0.00449958	Inactive	-1	-1	-1
1922	CHEMBL436921	2.09028	5	0	0	0	0.0289288	-0.0846114	1.25924	3.54422	3.30347	0.822584	0.817219	0.89288	156.798	0.0158951	Inactive	-1	-1	-1
1923	CHEMBL2316657	1.90642	12	0	0.02174	0	0.0308579	0.0512767	1.33726	3.76082	3.42477	0.988029	1.04056	0.87645	150.262	0	Inactive	-1	-1	-1
1924	CHEMBL198195	1.93865	12	3	0.04348	0	0.0212637	-0.234505	1.23191	3.45795	3.26095	0.784484	0.813755	0.97109	151.099	0	Inactive	-1	-1	-1
1925	CHEMBL3133767	1.95904	7	0	0.02	0	0.0268792	0.0716804	1.39715	3.79749	3.39239	0.891992	1.14403	0.91308	152.18	0	Inactive	-1	-1	-1
1926	CHEMBL66347	1.98061	14	0	0.06452	0	0.0290631	-0.053133	1.2059	3.69778	3.50424	0.725991	0.903984	0.92593	153.56	0	Inactive	-1	1	-1
1927	CHEMBL3581803	1.97579	11	0	0.01786	0	0.0239472	-0.0337857	1.42125	3.78909	3.41545	0.741323	0.717387	0.94081	156.391	0	Inactive	-1	-1	-1
1928	CHEMBL10835	1.96373	12	0	0.06667	0	0.0391405	-0.046467	1.4012	3.71526	3.51761	0.77518	0.981782	0.88985	150.151	0	Inactive	-1	1	-1
1929	CHEMBL3601696	2.14174	11	1	0.0625	0	0.0233885	-0.160598	1.36341	3.60898	3.2317	0.63136	0.820894	1.13449	151.254	0	Inactive	-1	-1	-1
1930	CHEMBL424711	1.87648	12	1	0	0	0.0335003	0.0260021	1.33651	3.74986	3.53278	0.862925	1.02596	1.031	153.115	0	Inactive	-1	-1	-1
1931	CHEMBL1796567	1.9257	14	4	0.03571	0	0.0246727	-0.106896	1.50296	3.84511	3.46891	0.753729	0.938832	0.92931	149.798	0	Inactive	-1	-1	-1
1932	CHEMBL92805	1.99886	11	0	0.05357	0	0.0277006	-0.155682	1.22935	3.74345	3.40169	0.736498	0.822312	1.02018	153.837	0	Inactive	-1	1	-1
1933	CHEMBL523652	2.01221	12	0	0.06522	0	0.0250636	-0.0688215	1.40017	3.53916	3.40739	0.709847	0.910881	0.95361	151.851	0	Inactive	-1	1	-1
1934	CHEMBL550592	2.00119	12	1	0.01667	0	0.0234505	-0.0801997	1.43052	3.74069	3.64431	0.901692	0.926672	1.03943	154.678	0	Inactive	-1	-1	-1
1935	CHEMBL1760398	1.93087	4	3	0	2.69663	0.0310436	-0.0624767	1.15525	3.34116	3.23063	0.925477	1.01722	0.52619	152.579	0.0240563	Inactive	-1	-1	-1
1936	CHEMBL1213730	1.90678	13	2	0.09091	0	0.0228827	-0.253161	1.19373	3.45392	3.19883	0.812983	0.87507	1.0534	150.376	0	Inactive	-1	-1	-1
1937	CHEMBL2377321	1.94845	11	2	0.02273	0	0.0300799	0.0544839	1.17361	3.68041	3.39441	1.10826	1.02106	0.78769	154.373	0	Inactive	-1	-1	-1
1938	CHEMBL518094	1.97829	16	1	0	0	0.0214736	0.00909173	1.5601	3.8374	3.65187	0.814345	0.865038	1.21581	151.231	0	Inactive	-1	-1	-1
1939	CHEMBL3392930	1.99449	12	0	0.02083	0	0.0200991	-0.0701043	1.52719	3.8009	3.38624	0.783494	0.940742	1.13871	148.96	0	Inactive	-1	-1	-1
1940	CHEMBL1171238	1.97469	13	0	0.01316	0	0.0260304	-0.00595013	1.33436	3.87661	3.78779	0.758445	0.920308	1.10947	152.765	0	Inactive	-1	-1	-1
1941	CHEMBL1761012	1.9844	16	1	0.05556	0	0.0238444	-0.08436	1.31071	3.8085	3.46155	0.905242	1.06657	1.02317	150.079	0	Inactive	-1	-1	-1
1942	CHEMBL488829	1.85352	5	0	0	0	0.0326178	-0.0242026	1.42717	3.24606	2.8988	0.976541	1.19082	0.82937	152.728	0.00658396	Inactive	-1	-1	-1
1943	CHEMBL141749	1.92673	13	0	0.05556	0	0.0273295	-0.0530593	1.50967	3.43805	2.97486	0.689216	0.980974	0.94888	141.958	0	Inactive	-1	-1	-1
1944	CHEMBL660	1.87544	11	2	0.12069	0	0.0293213	-0.114256	1.30942	3.81081	3.48131	0.621295	0.802455	0.99558	152.888	0	Inactive	-1	1	-1
1945	CHEMBL222016	1.98203	10	0	0.04	0	0.0339658	-0.165378	1.26136	3.6668	3.4542	0.952482	1.09614	0.89676	151.55	0	Inactive	-1	1	-1
1946	CHEMBL420687	1.96228	16	0	0	0	0.0296046	0.0171526	1.72036	3.86284	3.61171	0.869051	0.973763	1.09076	146.432	0	Inactive	-1	-1	-1
1947	CHEMBL3637891	1.99187	10	0	0.025	0	0.0298121	-0.150155	1.53291	3.62837	3.25068	0.834366	0.955256	0.95876	149.339	0.00981479	Inactive	-1	-1	-1
1948	CHEMBL531591	1.86364	12	1	0	0	0.0253883	-0.0381463	1.20327	3.7499	3.53479	0.881494	1.05333	1.07511	156.933	0	Inactive	-1	-1	-1
1949	CHEMBL201460	1.9811	10	2	0.04167	2.05901	0.0274608	-0.00188836	1.23442	3.70104	3.58687	0.832722	1.02467	0.92424	158.484	0.00449958	Inactive	-1	-1	-1
1950	CHEMBL1780201	1.92809	13	1	0	0	0.0253501	-0.0353228	1.31767	3.82875	3.49055	0.942387	1.06151	1.07113	150.621	0	Inactive	-1	-1	-1
1951	CHEMBL1927490	1.98071	9	0	0.02273	1.64988	0.0256817	0.0274253	1.21163	3.58455	3.36459	0.766287	0.953147	0.90791	150.741	0.0833333	Inactive	-1	-1	-1
1952	CHEMBL997	1.93818	10	1	0.02273	0	0.0316527	-0.0116298	1.20616	3.62981	3.40664	1.05992	1.12026	0.78873	153.071	0	Inactive	-1	-1	-1
1953	CHEMBL221234	1.86548	9	2	0.04	0	0.0337622	-0.0588178	1.24504	3.56591	3.40663	1.00005	1.06502	0.87031	154.998	0	Inactive	-1	-1	-1
1954	CHEMBL1214028	2.0958	3	2	0	6.64337	0.0426354	-0.22557	1.13114	3.79932	3.57676	0.862591	1.00963	0.68591	152.447	0.195602	Inactive	-1	-1	-1
1955	CHEMBL1923919	1.98875	2	0	0	5.50461	0.0463214	-0.119324	0.986255	3.47296	3.37852	0.844547	0.971611	0.38615	150.739	0.129966	Inactive	-1	-1	-1
1956	CHEMBL3580676	1.98787	17	1	0	0	0.0246115	0.0454474	1.49255	3.7936	3.40478	0.87577	1.05473	0.9975	141.936	0	Inactive	-1	-1	-1
1957	CHEMBL210692	1.95756	22	1	0.03947	0	0.0249036	-0.0479476	1.42858	3.89404	3.78804	0.854879	1.00196	1.25576	147.707	0	Inactive	-1	-1	-1
1958	CHEMBL19954	2.10858	14	1	0.03846	0	0.0249879	-0.150404	1.35007	3.68362	3.47746	0.728257	0.871348	1.07048	148.167	0.013736	Inactive	-1	-1	-1
1959	CHEMBL2316656	1.93336	10	0	0.02174	0	0.0356061	0.0336345	1.29982	3.7643	3.4086	0.989174	1.08943	0.84412	152.646	0	Inactive	-1	-1	-1
1960	CHEMBL139374	1.91919	13	0	0.02941	0	0.0266391	-0.0455425	1.36391	3.4319	2.9541	0.908734	1.13078	0.93226	142.267	0	Inactive	-1	-1	-1
1961	CHEMBL299137	1.9159	13	2	0.08696	0	0.0241086	-0.206572	1.45755	3.47826	3.20355	0.595555	0.608139	1.02492	150.203	0	Inactive	-1	-1	-1
1962	CHEMBL388948	2.12978	17	0	0.05556	0	0.0226079	0.00146919	1.56596	3.7421	3.72192	0.898172	1.11171	1.12552	147.541	0	Inactive	-1	-1	-1
1963	CHEMBL16300	1.93263	13	0	0.05556	0	0.0310782	-0.1898	1.61529	3.43748	2.97287	0.63409	0.866413	0.92275	141.385	0	Inactive	-1	-1	-1
1964	CHEMBL362378	1.92575	7	1	0.02703	0	0.0271709	-0.0288956	1.14149	3.76099	3.62435	0.782466	1.0193	0.95351	157.595	0	Inactive	-1	-1	-1
1965	CHEMBL2338376	2.01382	9	0	0.02083	0	0.0322172	0.00721699	1.50177	3.62146	3.41931	0.986237	1.11891	0.83756	149.379	0	Inactive	-1	-1	-1
1966	CHEMBL399528	2.08327	13	0	0.04	0	0.0215466	-0.112343	1.34277	3.75665	3.4049	0.646918	0.694924	1.06266	154.455	0	Inactive	-1	1	-1
1967	CHEMBL1796534	2.00886	18	0	0.03226	0	0.0251332	-0.0922885	1.49924	3.8707	3.6534	0.822145	1.02138	1.20557	148.656	0.00849986	Inactive	-1	1	-1
1968	CHEMBL1689607	1.89332	10	0	0.01667	0	0.0293514	0.0237293	1.27136	3.74669	3.57484	0.764207	1.02059	0.90979	152.1	0	Inactive	-1	1	-1
1969	CHEMBL2377303	1.97425	10	0	0.025	0	0.0255518	-0.151958	1.37856	3.50159	3.22	0.634604	0.793891	0.93477	149.707	0	Inactive	-1	-1	-1
1970	CHEMBL1822422	1.98426	12	0	0.03704	0	0.0367251	-0.105875	1.28466	3.66257	3.45032	0.870341	0.983552	0.86778	150.811	0	Inactive	-1	1	1
1971	CHEMBL563587	1.93402	12	2	0.04	0	0.0245649	-0.0720116	1.2784	3.58263	3.42359	0.865855	0.891546	0.91718	152.036	0	Inactive	-1	-1	-1
1972	CHEMBL491890	1.97447	7	1	0.05263	0	0.0263836	-0.225695	1.07135	3.45582	3.20156	0.743985	0.822945	0.73758	158.247	0	Inactive	-1	-1	-1
1973	CHEMBL551200	1.96756	10	0	0.03704	0	0.0366527	-0.0707782	1.25479	3.69163	3.51297	0.946398	1.11147	0.84474	151.893	0	Inactive	-1	1	-1
1974	CHEMBL224312	1.91016	12	1	0.03571	0	0.0241409	-0.0455662	1.32705	3.85337	3.50484	0.903129	1.02374	1.07779	152.258	0	Inactive	-1	-1	-1
1975	CHEMBL1796437	1.99963	12	0	0.01515	0	0.0245913	0.000614	1.37073	3.83713	3.66209	0.871822	0.99067	1.11833	153.339	0.00849986	Inactive	-1	-1	-1
1976	CHEMBL2316640	1.93795	13	1	0	0	0.0197394	-0.0132459	1.39566	3.43221	2.96708	0.762104	1.09087	0.96373	141.957	0	Inactive	-1	-1	-1
1977	CHEMBL375848	1.93481	12	1	0.03704	0	0.0317403	-0.0818061	1.31274	3.77782	3.45547	0.973436	0.842282	0.94557	156.717	0	Inactive	-1	-1	-1
1978	CHEMBL139679	1.90638	13	0	0.05556	0	0.0243588	-0.11927	1.40717	3.44626	2.99633	0.80325	1.13038	0.97217	144.139	0	Inactive	-1	-1	-1
1979	CHEMBL1214817	1.85318	6	1	0.03448	0	0.0256484	0.035911	1.25366	3.75754	3.58279	0.839722	0.999156	0.91169	156.743	0	Inactive	-1	-1	-1
1980	CHEMBL271883	1.95351	16	0	0	0	0.0210937	-0.121705	1.56138	3.81543	3.49334	0.777844	1.03171	1.20003	149.619	0	Inactive	-1	1	-1
1981	CHEMBL3753627	1.9128	13	2	0.04762	0	0.0257731	-0.256075	1.19824	3.48741	3.30578	0.930351	0.946276	0.92618	150.531	0	Inactive	-1	-1	-1
1982	CHEMBL1651052	1.84169	5	0	0	0	0.0288622	0.110181	1.17218	3.66825	3.45034	0.905925	1.11689	0.74073	155.383	0	Inactive	-1	1	-1
1983	CHEMBL451452	1.92167	14	4	0.01852	0	0.0224679	-0.0508277	1.52459	3.83161	3.46683	0.907999	1.02238	0.94724	148.814	0	Inactive	-1	-1	-1
1984	CHEMBL1761009	1.96132	7	1	0.04	0	0.0306116	-0.120546	1.1102	3.64162	3.4267	0.80507	0.882495	0.73365	160.691	0	Inactive	-1	1	-1
1985	CHEMBL253141	2.07098	23	2	0.05128	0	0.0222813	-0.127823	1.39788	3.89262	3.79154	0.73409	0.909953	1.23384	150.009	0	Inactive	-1	-1	-1
1986	CHEMBL597856	1.94161	19	0	0.08621	0	0.0273568	-0.107254	1.56447	3.85632	3.49015	0.622859	0.869852	1.12423	145.301	0	Inactive	-1	-1	-1
1987	CHEMBL255488	2.06442	13	0	0	0	0.0215123	-0.0794479	1.44202	3.5982	3.12895	0.872541	0.980338	0.97029	143.784	0	Inactive	-1	-1	-1
1988	CHEMBL526279	2.01351	19	0	0.01613	0	0.0232486	-0.0734568	1.51413	3.86487	3.73208	0.760478	1.00901	1.13017	148.054	0	Inactive	-1	-1	-1
1989	CHEMBL325269	1.87617	11	1	0	0	0.0341318	-0.0115216	1.31887	3.84969	3.66321	0.989746	1.16816	0.98215	152.43	0	Inactive	-1	-1	-1
1990	CHEMBL393474	1.99054	11	0	0.02632	0	0.0249739	-0.173428	1.57629	3.44227	3.12077	0.525005	0.606942	0.87673	147.272	0	Inactive	-1	-1	-1
1991	CHEMBL219397	2.01464	13	0	0.06	0	0.0313078	-0.192977	1.3587	3.64405	3.46459	0.615549	0.784749	0.99394	150.878	0.00849986	Inactive	-1	1	-1
1992	CHEMBL56146	1.93549	13	0	0.08	0	0.0246926	0.00515934	1.3278	3.6412	3.43423	0.709237	1.06649	1.04155	146.824	0	Inactive	-1	1	-1
1993	CHEMBL50	1.91252	14	0	0.07692	0	0.0217036	-0.0990194	1.35275	3.65415	3.34314	0.811129	1.10136	1.18615	148.552	0	Inactive	-1	-1	-1
1994	CHEMBL549931	1.92116	19	3	0.09091	0	0.0246005	-0.186158	1.32659	3.86182	3.50629	0.738995	0.780375	1.17809	152.717	0	Inactive	-1	-1	-1
1995	CHEMBL3338907	2.01771	18	0	0.0303	0	0.0256081	-0.156153	1.31057	3.87471	3.55702	0.721536	0.963673	1.11013	149.773	0	Inactive	-1	1	-1
1996	CHEMBL3426256	1.9555	22	0	0.02564	0	0.0247904	-0.00346165	1.47479	3.90005	3.78977	0.790916	1.07888	1.3222	146.471	0	Inactive	-1	-1	-1
1997	CHEMBL51483	1.95879	9	2	0	0	0.0324207	0.104877	1.19391	3.72686	3.49462	1.08365	0.933492	0.74778	155.107	0	Inactive	-1	-1	-1
1998	CHEMBL482469	1.99104	19	1	0.07143	0	0.024766	-0.147818	1.49245	3.79679	3.47918	0.633382	0.865706	1.03486	148.205	0	Inactive	-1	1	-1
1999	CHEMBL2042177	1.94668	4	3	0	2.54223	0.0311214	-0.00567299	1.11422	3.45047	3.2323	0.909578	0.997202	0.52436	152.754	0.0240563	Inactive	-1	-1	-1
[truncated: 2,751 more rows]
